# Supplementary material for: Adherence to stay-at-home orders: awareness, implementation and difficulties of officially ordered quarantine measures in the context of the COVID-19 pandemic in Cologne – a retrospective cohort study
Source: PubMed Central journal article supplement — BMJ Open. 2022 Nov 2;12(11):e063358. doi: 10.1136/bmjopen-2022-063358 (PMC9638749; doi:10.1136/bmjopen-2022-063358), 2022-11-02
Supplement: bmjopen-2022-063358.draft_revisions.pdf [file bmjopen-2022-063358.draft_revisions.pdf]

# BMJ Open

BMJ Open is committed to open peer review. As part of this commitment we make the peer review history of every article we publish publicly available.

When an article is published we post the peer reviewers' comments and the authors' responses online. We also post the versions of the paper that were used during peer review. These are the versions that the peer review comments apply to.

The versions of the paper that follow are the versions that were submitted during the peer review process. They are not the versions of record or the final published versions. They should not be cited or distributed as the published version of this manuscript.

BMJ Open is an open access journal and the full, final, typeset and author-corrected version of record of the manuscript is available on our site with no access controls, subscription charges or pay-per-view fees (<http://bmjopen.bmj.com>).

If you have any questions on BMJ Open's open peer review process please email [info.bmjopen@bmj.com](mailto:info.bmjopen@bmj.com)

# BMJ Open

## Adherence to stay-at-home orders: awareness, implementation and difficulties of the officially ordered quarantine measures in the context of the SARS-CoV2 pandemic in Cologne - a cross-sectional cohort study

|                               |                                                                                                                                                                                                                                                                                                                                                                                                                                                                                                                                                                                                                                                                                                                                                                                                                                                                                                                                                                                                                                                                                                                                                                         |
|-------------------------------|-------------------------------------------------------------------------------------------------------------------------------------------------------------------------------------------------------------------------------------------------------------------------------------------------------------------------------------------------------------------------------------------------------------------------------------------------------------------------------------------------------------------------------------------------------------------------------------------------------------------------------------------------------------------------------------------------------------------------------------------------------------------------------------------------------------------------------------------------------------------------------------------------------------------------------------------------------------------------------------------------------------------------------------------------------------------------------------------------------------------------------------------------------------------------|
| Journal:                      | <i>BMJ Open</i>                                                                                                                                                                                                                                                                                                                                                                                                                                                                                                                                                                                                                                                                                                                                                                                                                                                                                                                                                                                                                                                                                                                                                         |
| Manuscript ID                 | bmjopen-2022-063358                                                                                                                                                                                                                                                                                                                                                                                                                                                                                                                                                                                                                                                                                                                                                                                                                                                                                                                                                                                                                                                                                                                                                     |
| Article Type:                 | Original research                                                                                                                                                                                                                                                                                                                                                                                                                                                                                                                                                                                                                                                                                                                                                                                                                                                                                                                                                                                                                                                                                                                                                       |
| Date Submitted by the Author: | 29-Mar-2022                                                                                                                                                                                                                                                                                                                                                                                                                                                                                                                                                                                                                                                                                                                                                                                                                                                                                                                                                                                                                                                                                                                                                             |
| Complete List of Authors:     | Book, Julian; Cologne Health Authority, Department of Infection Control and Environmental Hygiene; RWTH Aachen University Medical Faculty, Institute for Occupational, Social and Environmental Medicine<br>Broichhaus, Lukas; Cologne Health Authority, Department of Infection Control and Environmental Hygiene; RWTH Aachen University Medical Faculty, Institute for Occupational, Social and Environmental Medicine<br>Grüne, Barbara; Cologne Health Authority, Department of Infection Control and Environmental Hygiene<br>Nießen, Johannes; Cologne Health Authority<br>Wiesmüller, Gerhard A.; Cologne Health Authority, Department of Infection Control and Environmental Hygiene; RWTH Aachen University Medical Faculty, Institute for Occupational, Social and Environmental Medicine<br>Joisten, Christine; Institute of Movement and Neurosciences, Department for physical activity in public health; Cologne Health Authority, Department of Infection Control and Environmental Hygiene<br>Kossow, Annelene; Cologne Health Authority, Department of Infection Control and Environmental Hygiene; University Hospital Munster, Institute of Hygiene |
| Keywords:                     | COVID-19, EPIDEMIOLOGY, Infection control < INFECTIOUS DISEASES, PUBLIC HEALTH                                                                                                                                                                                                                                                                                                                                                                                                                                                                                                                                                                                                                                                                                                                                                                                                                                                                                                                                                                                                                                                                                          |
|                               |                                                                                                                                                                                                                                                                                                                                                                                                                                                                                                                                                                                                                                                                                                                                                                                                                                                                                                                                                                                                                                                                                                                                                                         |

SCHOLARONE™  
Manuscripts

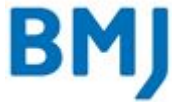

I, the Submitting Author has the right to grant and does grant on behalf of all authors of the Work (as defined in the below author licence), an exclusive licence and/or a non-exclusive licence for contributions from authors who are: i) UK Crown employees; ii) where BMJ has agreed a CC-BY licence shall apply, and/or iii) in accordance with the terms applicable for US Federal Government officers or employees acting as part of their official duties; on a worldwide, perpetual, irrevocable, royalty-free basis to BMJ Publishing Group Ltd ("BMJ") its licensees and where the relevant Journal is co-owned by BMJ to the co-owners of the Journal, to publish the Work in this journal and any other BMJ products and to exploit all rights, as set out in our [licence](#).

The Submitting Author accepts and understands that any supply made under these terms is made by BMJ to the Submitting Author unless you are acting as an employee on behalf of your employer or a postgraduate student of an affiliated institution which is paying any applicable article publishing charge ("APC") for Open Access articles. Where the Submitting Author wishes to make the Work available on an Open Access basis (and intends to pay the relevant APC), the terms of reuse of such Open Access shall be governed by a Creative Commons licence – details of these licences and which [Creative Commons](#) licence will apply to this Work are set out in our licence referred to above.

Other than as permitted in any relevant BMJ Author's Self Archiving Policies, I confirm this Work has not been accepted for publication elsewhere, is not being considered for publication elsewhere and does not duplicate material already published. I confirm all authors consent to publication of this Work and authorise the granting of this licence.

1  
2  
3  
4 **Adherence to stay-at-home orders: awareness, implementation and difficulties of the**  
5 **officially ordered quarantine measures in the context of the SARS-CoV2 pandemic in**  
6 **Cologne - a cross-sectional cohort study**  
7  
8

9 **Authors:** Julian Book<sup>1,2</sup>, Lukas Broichhaus<sup>1,2</sup>, Barbara Grüne MD<sup>1</sup>, Johannes Nießen MD<sup>3</sup>, Prof.  
10 Gerhard A Wiesmüller MD<sup>1,2</sup>, Prof. Christine Joisten MD, PhD<sup>1,4,\*</sup>, Annelene Kossow MD,  
11 PhD<sup>1,5,\*</sup>  
12

13 **Author affiliations:**

14 1 Department of Infection Control and Environmental Hygiene, Cologne Health  
15 Authority, Cologne, Germany

16 2 Institute for Occupational, Social and Environmental Medicine, Uniclinic RWTH Aachen,  
17 Aachen, Germany

18 3 Cologne Health Authority, Cologne, Germany

19 4 Department for Physical Activity in Public Health, German Sport University Institute  
20 of Movement and Neurosciences, Cologne, Germany

21 5 Institute of Hygiene, University Hospital Muenster, Muenster, Germany

22 \* contributed equally  
23  
24  
25  
26

27 **Corresponding Author:**

28 Julian Book

29 Gleueler Str. 163, 50931 Cologne, Germany

30 E-Mail: julian.book@gmx.de  
31  
32

33 **Word count:** 4718 words  
34  
35

36 **Keywords (MeSH-Terms):**

37 Public Health, Infectious Disease Medicine, COVID-19, Quarantine, Guideline Adherence,  
38 Patient Isolation  
39  
40  
41  
42  
43  
44  
45  
46  
47  
48  
49  
50  
51  
52  
53  
54  
55  
56  
57  
58  
59  
60

## ABSTRACT

### Objectives:

To estimate the awareness, implementation and difficulty of behavioural recommendations and their influencing factors in officially ordered domestic isolation and quarantine during the Covid-19 pandemic.

### Design:

Online cross-sectional cohort survey conducted from 12.12.2020 to 6.1.2021 as part of the CoCo-Fakt study (Cologne-Corona Counselling and Support for Index- and Contact Persons during the Quarantine Period).

### Setting:

Administrative area of the City of Cologne, Germany

### Participants:

3011 infected persons and 5822 contacts over 16 years of age who were in officially ordered domestic isolation or quarantine between 28.02.2020 and 09.12.2020. Of these, 60.4% were females.

### Outcome measures:

Based on the responses on awareness and implementation of 19 behavioural recommendations, scores were calculated to determine community- and household-based adherence. Linear regression analyses were conducted to determine factors influencing adherence.

### Results

The average adherence to all recommendations, including among others, staying in a single room, keeping distance and wearing a mask was 92.8% and 68.8% for community-based recommendations (CBRs) and household-based recommendations (HBRs), respectively. Infected persons were significantly more adherent to CBRs (95.3% vs. 91.2%;  $p < .001$ ) and HBRs (72.9% vs. 66.0%;  $p < .001$ ) than contact persons. Among other factors, both status as an infected person and being informed about the measures in a comprehensible way had positive influences on participants' adherence. The linear regression analysis explained 6,6% and 14,4% (corr.  $R^2$ ) of the adherence to HBRs and CBRs.

### Conclusion

Not all persons under official quarantine were aware of the relevant behavioural recommendations. This was especially true in cases where instructions were given for measures to be taken in one's own household. Due to the high transmission rates within a household, HBRs should therefore be communicated with particular emphasis. In counselling citizens, care should also be taken to ensure that those affected understand how they should behave during quarantine and why these measures are meaningful.

### STRENGTHS AND LIMITATIONS OF THIS STUDY

- A large, homogenous cohort of participants in officially ordered isolation and quarantine, a subgroup among which studies on adherence are lacking.

- Detailed consideration of the various recommendations in domestic isolation and quarantine, taking motivation into account
- This survey was limited to the catchment area of the Cologne Health Department, Germany.
- Selection bias due to the online format of the survey.
- Non-compliance with the officially ordered isolation and quarantine measures is a punishable offence in Germany. Even though the anonymity of participation was explicitly mentioned in our survey, it cannot be ruled out that this led to desired and less honest answers.

## INTRODUCTION

Alongside vaccination, non-pharmaceutical interventions such as restrictions in public life, social distancing and, in particular, the isolation of people infected with Covid-19 (infected persons = IPs) and the quarantine of their close contacts (contact persons = CPs) continue to constitute a central pillar in the control of Covid-19 in many countries.[1] It is undisputed that the effectiveness of the quarantine measures is largely dependent on the adherence of the persons concerned.[2, 3] In studies of previous pandemics, this effectiveness varied considerably (between 0 and 92.8%) and depended not only on financial security and sufficient food supply, but also on an understanding of the required measures and the perception of social pressure.[2] Previous studies on adherence to social distancing measures in the Covid-19 pandemic yielded findings ranging from 87% adherence[4] to 92.8% non-adherence[5], but they are hardly comparable with each other due to very different questionnaire items and assessment criteria. In summary, it was found that women consistently achieved higher adherence scores than men, and that older people and people with higher levels of education or socioeconomic status (SES) were more likely to implement the interventions than younger people or those with lower levels of education or SES.[4–9]

The aforementioned studies mainly addressed general social distancing measures and self-isolation; adherence to officially ordered isolation and quarantine was hardly investigated. IPs and CPs have a particularly high potential for infection. Before the start of vaccinations, the household secondary attack rate was 16.6%, and during the course of vaccinations, at least one infection occurred in 31.7% of multi-person households.[10] In a Norwegian cohort study, almost 1900 people with positive Covid-19 tests were identified from August to October 2020. Among them, 79% of the men and 91% of the women reported isolation.[11] In a UK cohort study that included a total of 1213 people with Covid-19 suspected symptoms, only 42.5% reported not leaving the house in the 10 days after symptom onset. In this context, women, the elderly and subjects with lower education levels, higher SES and no dependent children in the household were more adherent[12]. Verberk et al. also examined households' levels of implementation of recommendations in a small study of 34 households, each with an index case. While in a majority of the households, staying in the same room with the IP was avoided and ventilation was more frequent, wearing masks in the household was more often not considered useful and not implemented.[13]

Although Covid-19 vaccination significantly reduces infection rates and infectivity of those affected, isolation and quarantine measures continue to be highly valued responses to the pandemic in the context of emerging variants of concern and reduced vaccine efficacy against these variants.[14, 15] Knowledge about the general level of awareness and implementation

of various measures, and of possible factors influencing awareness and implementation, is therefore essential. Within the CoCo-Fakt cohort study (Cologne-Corona Counselling and Support for Index- and Contact Persons during the Quarantine Period), IPs and CPs in the area of responsibility of the Cologne Health Department, the largest health department in Germany, were surveyed regarding their adherence to quarantine measures following an officially ordered domestic quarantine. In addition to awareness and implementation of the respective behavioural recommendations, the study investigated the difficulties experienced during implementation and the individual factors associated with adherent or non-adherent behaviour.[14, 16]

## METHODS

### Study design

The CoCo-Fakt study examined a cohort of IPs and their relevant CPs, who had been quarantined by Cologne's local health authorities since the beginning of the SARS-CoV-2 pandemic in February 2020. The questionnaire was developed and modified based on the COVID-19 Snapshot Monitoring questionnaire from the University of Erfurt (COSMO) and carried out with the online survey software Unipark.[17] Ethics approval was obtained from the Rheinisch-Westfälische Technische Hochschule Aachen Human Ethics Research Committee (351/20); see Joisten et al.[16] Responding to the questionnaire took approximately 30 minutes, and qualitative data were evaluated using MAXQDA software. The survey was conducted from 12.12.2020 to 6.1.2021.

### Sampling and study population

Approximately 1,083,000 citizens fall under the jurisdiction of the Cologne Health Department. Starting in February 2020, IPs and CPs were contacted on the telephone by trained staff from the Cologne Health Authority and questioned in a standardised interview regarding their symptoms, possible routes of infection, chronic diseases, risk factors and residential and family situations.[14] These individuals were quarantined based on the legal regulations for combating infectious diseases according to the Infectious Diseases Protection Act (German 'Infektionsschutzgesetz', or, IfSG), with the usual length of quarantine for IPs being 14 days after symptom onset or a positive test result. The quarantine period for CPs was 10–14 days at the time of this survey, depending on the time of last contact. Until October 2020, this period could be extended, lasting for several weeks in families that could not be physically separated. All data were recorded using the Cologne Health Authority's specially programmed software, the digital contact management system (DiKoMa).[18]

From February 28 (first case in Cologne) to December 9, 2020, all persons who were at least 16 years old, registered in DiKoMa with a positive SARS-CoV-2 test (quantitative real-time polymerase chain reaction) and whose informed consent was obtained were integrated into this analysis along with their relevant CPs. Contacts who tested positive for SARS-CoV-19 during quarantine were included in the infected group.

### Sampling and study population

36498 persons whose email addresses were known could be identified in DiKoMa during the period under consideration. Of these, 33699 persons were sent the questionnaire and 13057 clicked on the questionnaire. Pregnant women who were monitored and advised particularly intensively by the Cologne Health Department during the study period, persons under 16 years

of age, subjects with missing or invalid essential information (sex, age, awareness of quarantine recommendations 1–3) as well as subjects who could not be assigned to the IP and CP groups (e.g. travel returnees) were excluded (N=3462). Thus, 9595 subjects (3773 IPs and 5822 CPs) were included in the analyses of adherence to community-based recommendations (CBRs). Household-based recommendations (HBRs) were relevant only for those individuals who needed to isolate themselves from others within a household. Therefore, individuals for whom this did not apply, such as those living alone or in cohort isolation, were not included in the analysis of household-based adherence (N=5584). A total of 3011 subjects (1197 IPs, 1814 CPs) were included in the analysis of household-based adherence (Fig. 1).

### Survey items

Demographic parameters and personal living situations

In addition to age, gender, migration background (yes/no) and relationship status (single/partnered), respondents were asked whether they had chronic illnesses (yes/no), had children (yes/no), lived alone (yes/no) or had access to a garden or balcony (yes/no). Socioeconomic status (SES) was determined based on the classifications of the German Health Update 2009.[19]

Quarantine recommendations: awareness, implementation and difficulties

A total of 19 recommendations for action relevant to isolation and quarantine for Covid-19 IPs and CPs were identified from the recommendations provided by the WHO, the European Centre for Disease Prevention and Control, the Robert Koch Institute (RKI) and the German Society for General and Family Medicine (Table 1).[20–23]

*Table 1: Behavioural recommendations in domestic quarantine and isolation. The evaluations of recommendations 1–4, 7, 8, 14 and 16 (bold), which the authors consider particularly relevant, are dealt with in the paper and included in the calculation. CBR: Community based recommendation HBR: Household based recommendation*

| No.       | Recommendation                                                                                                              |          |
|-----------|-----------------------------------------------------------------------------------------------------------------------------|----------|
| <b>1</b>  | <b>Do not leave your home.</b>                                                                                              | <b>C</b> |
| <b>2</b>  | <b>Do not receive visitors.</b>                                                                                             | <b>B</b> |
| <b>3</b>  | <b>Avoid personal contact with postal and delivery workers and have deliveries left outside the house or flat entrance.</b> | <b>R</b> |
| <b>4</b>  | <b>Stay apart from other household members in a single room.</b>                                                            | <b>H</b> |
| 5         | Sleep separately from other household members in a single room.                                                             | <b>B</b> |
| 6         | Have contact with other household members only when you need their help.                                                    | <b>R</b> |
| <b>7</b>  | <b>Keep at least a 1.5m distance when in contact with other household members.</b>                                          |          |
| <b>8</b>  | <b>Wear a mouth-nose mask when in contact with other household members.</b>                                                 |          |
| 9         | Take your meals in a different room from other household members.                                                           |          |
| 10        | Use the bathroom, hallway, kitchen and other common areas only when absolutely necessary.                                   |          |
| 11        | Use only one toilet. The rest of the household members should not use this toilet.                                          |          |
| 12        | The bathroom you use should be cleaned at least once a day.                                                                 |          |
| 13        | Surfaces you frequently touch (bedside table, door handles, smartphone, work surfaces, etc.) should be cleaned once a day.  |          |
| <b>14</b> | <b>Air all rooms regularly.</b>                                                                                             |          |
| 15        | Sneeze into the crook of your elbow or a disposable handkerchief.                                                           |          |
| <b>16</b> | <b>Wash your hands regularly for at least 20 seconds, especially after blowing your nose or sneezing.</b>                   |          |



|    |                                                                                                          |
|----|----------------------------------------------------------------------------------------------------------|
| 17 | Collect tissues, gloves and other rubbish in a lidded bin in your room.                                  |
| 18 | After washing your hands, use paper towels or a towel that only you use, and change it daily.            |
| 19 | Wash your clothes at a minimum of 60 degrees and separately from the laundry of other household members. |

Of these, three recommendations (do not receive visitors, stay at home and have no contact with delivery or postal workers) relate to seclusion from the public and are relevant for all persons in quarantine (community-based recommendations, or, CBRs). The other 16 recommendations relate to seclusion within a household and are only relevant to people who need to isolate themselves from other household members, but not to people living alone, or to index people in cohort isolation (household-based recommendations, or, HBRs). To identify subjects for whom HBRs are relevant, the item, 'Did you have to isolate yourself from other household members during your quarantine? (yes/no)' was included in the questionnaire.

CBRs 1–3 were presented to all participants. The HBRs were presented only to subjects who indicated that they had to isolate themselves from other household members. Recommendation 11 (use of a separate toilet) was also presented only to subjects who had previously reported living in a household with more than one toilet. For each recommendation presented, the respondents were first asked whether the respective recommendation was known (yes/no). If the recommendation was known, they were also asked to what extent it had been implemented and how difficult it was to implement. The survey was carried out using a 6-part interval scale with endpoints 1  $\triangleq$  I have not implemented at all 6  $\triangleq$  I have fully implemented, and 1  $\triangleq$  I have found this very difficult 6  $\triangleq$  I have not found this difficult at all.

Whereas at the beginning of the Covid-19 pandemic, droplet and smear infection were considered the main transmission routes, respiratory ingestion of virus-containing particles in the form of aerosols has been identified as the most important transmission route in the further course of the pandemic.[24] In the present paper, the CBRs on staying in a single room, regular ventilation, wearing a mouth-nose covering, keeping a distance of 1.5 m from other persons and hand hygiene, which are considered particularly relevant for the prevention of aerosol transmission and are promoted in an extensive public campaign by the German Federal Ministry of Health, are considered in more detail.[25] Evaluations of other recommendations can be found in the supplement (Tables S1-3).

### Adherence scores

#### Baseline adherence score

A baseline adherence score was calculated to map individual adherence and examine influencing factors. The basis for this baseline adherence score was the awareness and implementation of the particularly important CBRs 1–3.

According to the answers on the 6-part scale for the implementation of the recommendations, each respondent received points from 0 (not implemented at all) to 5 (fully implemented) for each of the three recommendations. If the recommendation was not known, or if the respondent did not provide information on implementation, 0 points were awarded. With three recommendations scored, the maximum possible score is 15, corresponding to a baseline adherence score of 100%.

#### Household adherence score

1  
2  
3 Following the same procedure, a household adherence score was calculated including HBRs  
4 4, 7, 8, 14 and 16 for all subjects who had to isolate themselves from other household  
5 members. Missing answers, including the answer 'I did not implement at all', were weighted  
6 with 0 points. With five recommendations scored, the maximum possible score is 25,  
7 corresponding to a household adherence score of 100%.

### 10 **Views on Covid-19 in relation to quarantine**

11 Based on the mechanisms for motivation and implementation of preventive health measures  
12 described by Rosenstock in the Health Belief Model[26], 11 statements or questions adapted  
13 to the Covid-19 pandemic were formulated:  
14

- 15 - 'I have been given clear information about the reason for the isolation/quarantine.'
- 16 - 'It was explained to me in an understandable way how to behave in  
17 isolation/quarantine.'
- 18 - 'People in my professional and social environment have expected me to implement  
19 the quarantine measures.'
- 20 - 'I think the coronavirus is dangerous.'
- 21 - 'When I isolate/quarantine myself, I am protecting myself.'
- 22 - 'When I isolate/ quarantine myself, I am protecting other members of my household.'
- 23 - 'When I isolate/ quarantine myself, I am protecting our society from a further spread  
24 of the coronavirus.'
- 25 - 'I experienced difficulties in obtaining everyday necessities during  
26 isolation/quarantine.'
- 27 - 'I suffered financial losses due to the isolation/quarantine.'
- 28 - 'I think the isolation/ quarantine measures are too strict.'
- 29 - 'I think the quarantine measures are too lax.'

30 Respondents' agreement with each statement was determined using a 6-item endpoint-  
31 named interval scale (strongly disagree–strongly agree). For the question regarding financial  
32 losses due to quarantine, the answer was binary (yes/no). The allocation of these statements  
33 to the relevant factors of the health-believe model is presented in the supplement (Table S4).

### 36 **Data analysis**

37 Descriptive and inductive data analyses were conducted using the programme SPSS 28.0 (IBM,  
38 Armonk, NY, USA). Chi-square tests and t-tests were conducted to assess the differences  
39 between IPs and CPs.

40 Linear backward regression analyses were conducted to determine the influence of age (in  
41 years), quarantine as an IP (1) or CP (2), gender (female = 1, male = 2), being in a partnership  
42 (no=1, yes = 2), living situation with balcony or garden (yes = 0, no = 1), migration background  
43 (no=1, yes=2), Socioeconomic status (high=1, middle and low=2), Comorbidity (yes=1, no=2),  
44 presence of children in the household (yes=1, no=2) well as the hypothetical influencing  
45 factors on baseline and household adherence scores listed above (Table S1) (agree=1;  
46 disagree=2). Non-significant factors were excluded during stepwise regression. A p-value  
47 below 0.05 was considered significant.

### 48 **Patient and Public Involvement**

49 The research questions and methods were developed based on the literature. In order to  
50 optimize the survey and align it according to the research questions, affected persons from  
51

the personal environment were first approached and asked to answer and assess the draft. From this collective, 20 additional affected persons were then recruited by snowball sampling and the feasibility and duration were tested. Since the online survey is anonymized, no individual results are given to the patients (see Joisten et al. 2021[16]). But future quarantined persons should benefit from our study.

## RESULTS

### Demographic parameters and personal life situation

The participants in the study were on average 40.9 years old (SD=14.2), and 63% were women. The data for the total group and data subdivided according to IP and CP are shown in Table 2.

Table 2: General characteristics of participants, total and by status as infected person or contact person; \* chi-2-test; \*\*unpaired t-test

| Variable                                 | Total<br>N (%) | Infected<br>persons<br>N (%) | Contact<br>persons<br>N (%) | p-Value |
|------------------------------------------|----------------|------------------------------|-----------------------------|---------|
| <b>Sample</b>                            | 9595 (100)     | 3773 (39.3)                  | 5822 (60.7)                 |         |
| <b>Sex</b>                               | 9595 (100)     |                              |                             |         |
| <b>Male</b>                              | 3797 (39.6)    | 1643 (43.5)                  | 2154 (37.0)                 | <.001*  |
| <b>Female</b>                            | 5798 (60.4)    | 2130 (56.5)                  | 3668 (63.0)                 |         |
| <b>Mean age years (SD)</b>               | 40.9 (14.2)    | 41.9 (14.3)                  | 40.3 (14.1)                 | <.001** |
| <b>Age Groups (years)</b>                | 9595 (100)     |                              |                             |         |
| <b>16-29</b>                             | 2580 (26.9)    | 925 (24.5)                   | 1655 (28.4)                 | <.001*  |
| <b>30-39</b>                             | 2260 (23.6)    | 853 (22.6)                   | 1407 (24.2)                 |         |
| <b>40-49</b>                             | 1771 (18.5)    | 731 (19.4)                   | 1040 (17.9)                 |         |
| <b>50-59</b>                             | 1953 (20.4)    | 812 (21.5)                   | 1141 (19.6)                 |         |
| <b>60-69</b>                             | 789 (8.2)      | 339 (9.0)                    | 450 (7.7)                   |         |
| <b>70+</b>                               | 242 (2.5)      | 113 (3.0)                    | 129 (2.2)                   |         |
| <b>Migration background</b>              | 9427 (100)     |                              |                             |         |
| <b>No</b>                                | 8919 (94.6)    | 3421 (92.8)                  | 5498 (95.8)                 | <.001*  |
| <b>Yes</b>                               | 508 (5.4)      | 265 (7.2)                    | 243 (4.2)                   |         |
| <b>Socioeconomic Status (SES)</b>        | 9522 (100)     |                              |                             |         |
| <b>High</b>                              | 7644 (80.3)    | 2964 (79.2)                  | 4680 (61.2)                 | .007*   |
| <b>Middle</b>                            | 1790 (18.8)    | 731 (19.5)                   | 1059 (59.2)                 |         |
| <b>Low</b>                               | 88 (0.9)       | 47 (1.3)                     | 41 (0.9)                    |         |
| <b>Married/ living in a Relationship</b> | 9383 (100)     |                              |                             |         |
| <b>No</b>                                | 2650 (28.2)    | 1012 (27.5)                  | 1638 (28.7)                 | .186*   |
| <b>yes</b>                               | 6733 (71.8)    | 2671 (72.5)                  | 4062 (71.3)                 |         |
| <b>Having children</b>                   | 9553 (100)     |                              |                             |         |
| <b>No</b>                                | 5419 (56.7)    | 2070 (55.2)                  | 3349 (57.7)                 | .013*   |
| <b>Yes</b>                               | 4134 (43.3)    | 1683 (44.8)                  | 2451 (42.3)                 |         |
| <b>Living alone</b>                      | 9545 (100)     |                              |                             |         |
| <b>No</b>                                | 6767 (70.9)    | 2656 (70.8)                  | 4111 (70.9)                 | .905*   |
| <b>Yes</b>                               | 2778 (29.1)    | 1094 (29.2)                  | 1684 (29.1)                 |         |
| <b>Access to balcony or garden</b>       | 9557 (100)     |                              |                             |         |
| <b>No</b>                                | 1443 (15.1)    | 530 (14.1)                   | 913 (15.7)                  | .030*   |
| <b>Yes</b>                               | 8114 (84.9)    | 3226 (85.9)                  | 4888 (84.3)                 |         |
| <b>Comorbidity</b>                       | 9264 (100)     |                              |                             |         |
| <b>No</b>                                | 7212 (77.8)    | 2768 (76.2)                  | 4444 (78.9)                 | .003*   |
| <b>Yes</b>                               | 2052 (22.2)    | 863 (23.8)                   | 1189 (21.1)                 |         |

### Baseline adherence score

The mean baseline adherence score was 92.8% (SD=15.7%). Only 0.7% (N=68) of respondents did not observe any of the CBRs, obtaining a score of 0%. Of the respondents, 70.8% fully implemented the included recommendations, corresponding to a baseline adherence score of 100%. IPs achieved a significantly higher adherence score than CPs (95.3% +/-13% vs 91.2% +/-17%;  $p < .001$ ). In total, 64.9% of contacts and 80.0% of index subjects achieved a baseline adherence score of 100%. The detailed distribution of the baseline adherence score is shown in the supplement (Table S5).

### Household adherence score

The mean household adherence score was 68.8% (SD=27.0%). Of the respondents, 2.2% (N=67) did not observe any of the HBRs, obtaining a score of 0%, whereas 18.2% fully implemented all included recommendations, corresponding to a household adherence score of 100%. IPs achieved a significantly higher adherence score than did CPs (72.9% +/-26.6% vs 66.0% +/-27%;  $p < .001$ ). In total, 22.8% of IPs and 15.1% of CPs achieved a household adherence score of 100%. The detailed distribution of the household adherence score is shown in the supplement (Table S6).

### Awareness of the recommendations

Results showed that 88.8% of all respondents, 92.2% of IPs and 86.6% of CPs, were aware of all three CBRs (stay at home, do not receive visitors and have no contact with delivery or postal workers). On average, 2.9 of the CBRs were known to the IPs and 2.8 were known to the CPs ( $p < .001$ ). While 98.7% of respondents were aware of the recommendation not to receive visitors, and 98.3% were aware of the recommendation not to leave home, only 90.1% were aware of the recommendation not to have contact with delivery or postal workers.

The awareness of the 16 HBRs varied more markedly. On average, 71.6% of the HBRs were known to all subjects, 75.7% to the IPs and 68.9% to the CPs. For example, only 33.2% of respondents were aware of the recommendation to wash laundry separately and at 60°, and only 41.1% knew about the recommendation to dispose of waste in a separate waste bin. On the other hand, 97.7% and 95.1% of the respondents stated that they were aware of the recommendations on coughing and sneezing etiquette and hand hygiene, respectively. While the recommendations on regular hand hygiene (IP: 94.6%; CP: 95.4%), staying in a single room (IP: 93.8%; CP: 88.8%), regular ventilation (IP: 91.9%; CP: 90.3%) and keeping a distance of 1.5m (IP: 88.6%; CP: 83.6%) were widely known, the recommendation to wear a mouth-nose covering inside their house or flat was less well known, especially among CPs (IP: 74.0%; CP: 63.1%) (Table S1).

### Implementation of the recommendations

On the 6-item endpoint-named interval scale for implementation of interventions, all CBRs achieved very high mean scores that ranged between 5.9 and 6.0 among IPs. CPs implemented the HBRs to a somewhat lesser degree, obtaining mean scores between 5.8 and 5.9. The HBRs on regular ventilation (IP: 5.7 CP: 5.6) and hand washing (IP: 5.7 CP: 5.7) were quite well implemented, with no appreciable differences between IPs and CPs here. Comparatively worse, with mean values of 4.9–5.2 (IPs) and 4.4–4.7 (CPs), were the HBRs on staying in a single room, keeping a distance of 1.5m and wearing a mouth-nose mask. These recommendations, which involve distancing oneself from other household members, were implemented significantly better by the IPs than by the CPs (see Figure 2 and Table S2).

### Difficulties of implementation

The greatest implementation difficulties were found in the recommendations requiring distancing from familiar people. The most problematic was the implementation of seclusion in a single room, with mean scores of 2.9 among IPs and 2.6 among CPs. The recommendations to wear a mouth-nose covering (IP: 4.4; CP: 3.9), keep a distance of 1.5m (IP: 3.8; CP: 3.4), avoid visitors (IP: 4.7; CP: 4.2) and stay at home (IP: 4.2; CP: 3.6) were also comparatively difficult to implement. In contrast, the recommendations on regular hand washing (IP: 5.6; CP: 5.6), airing (IP: 5.6; CP: 5.5) and avoiding contact with delivery and postal workers (IP: 5.6; CP: 5.5) were easy to implement (see Figure 2 and Table S3).

### Views on isolation and quarantine for Covid-19

The majority of subjects (74.9%) agreed or strongly agreed with the statement that they had been given clear information about the reason for their isolation/quarantine. Moreover, 70.1% stated that they had also been given clear information about how to behave during isolation/quarantine. Both statements attained significantly higher agreement values among IPs than among CPs (with mean values of 5.3 and 5.1, respectively, versus 4.8 and 4.7, respectively;  $p < .001$ ). Of all respondents, 86.2% considered the coronavirus to be dangerous, and 95.3% agreed or fully agreed with the statement that quarantine measures would protect society from further spread of the coronavirus; however, only 61.4% agreed with the statement that isolation measures would protect other household members. A high percentage of respondents (84.9%) assumed that people around them expected them to comply with the quarantine measures. A lower percentage (18.8%) stated that they had suffered financial losses due to the isolation/quarantine (79.3% no losses, 1.8% prefer not to say). A low percentage of respondents (15.4%) also stated that they experienced difficulties in obtaining everyday necessities during isolation/quarantine (see Table S4).

### Factors influencing adherence during isolation and quarantine

Regression analysis was used to determine factors influencing baseline adherence scores. The Baseline models are shown in the supplement (Table S7). The final models are shown in Table 3. A total number of 7173 subjects were included in the regression analysis of the baseline adherence score. Factors correlating with higher baseline scores include status as an IP ( $\beta = -0.102$ ;  $p < .001$ ), older age ( $\beta = 0.055$ ;  $p < .001$ ), presence of children in the household ( $\beta = -0.037$ ;  $p = .008$ ) and agreement with the following statements: 'It was explained to me in an understandable way how to behave in quarantine' ( $\beta = 0.136$ ;  $p < .001$ ), 'When I isolate/quarantine myself, I am protecting other members of my household' ( $\beta = 0.046$ ;  $p < .001$ ), 'When I isolate/quarantine myself, I am protecting our society from a further spread of the coronavirus' ( $\beta = 0.049$ ;  $p < .001$ ) and 'People in my professional and social environment have expected me to implement the quarantine measures' ( $\beta = 0.069$ ;  $p < .001$ ). Agreement with the statements that the isolation/quarantine measures were too strict ( $\beta = -0.049$ ;  $p < .001$ ), too lax ( $\beta = -0.033$ ;  $p = 0.004$ ) or that there were supply difficulties during isolation/quarantine ( $\beta = -0.042$ ;  $p < .001$ ) was associated with a lower baseline adherence score. The model explained 6.6% (corr.  $R^2$ ) of the variance.

Factors influencing household adherence scores were analysed analogously (see supplement Table S7 and Table 3). A total number of 2227 subjects were included in the regression analysis of the household adherence score. Here, factors correlating with higher household adherence scores included IP status ( $\beta = -0.103$ ;  $p < .001$ ), older age ( $\beta = 0.108$ ;  $p < .001$ ), male gender



( $\beta=0.043$ ;  $p=0.030$ ), migration background ( $\beta=0.058$ ;  $p=.004$ ), lower SES ( $\beta=-0.045$ ;  $p=0.025$ ), living in a relationship ( $\beta=0.099$ ;  $p<.001$ ), having children in the household ( $\beta=-0.058$ ;  $p=0.028$ ), considering coronavirus dangerous ( $\beta=0.052$ ;  $p=0.011$ ) and agreement with the following statements: 'I have been given clear information about the reason for the isolation/quarantine.' ( $\beta=0.060$ ;  $p=0.014$ ), 'It was explained in an understandable way how to behave in isolation/quarantine' ( $\beta=0.047$ ;  $p=0.051$ ), 'When I isolate/ quarantine myself, I am protecting other members of my household.' ( $\beta=0.240$ ;  $p<.001$ ) and 'When I isolate/ quarantine myself, I am protecting our society from a further spread of the coronavirus' ( $\beta=0.037$ ;  $p=0.072$ ). In addition, there was a positive association between financial losses due to quarantine and household adherence ( $\beta=-0.034$ ;  $p=0.090$ ). The model explained 14,4% (corr.  $R^2$ ) of the variance.

Table 3 Factors influencing the baseline and household adherence score. Final models of linear backward regression analyses \*(disagree=1; agree=2)

| Final models                                                                                               | Non-Standardised Coefficients |            | Standardised Coefficients | Sig.  | 95% Confidence Interval |             |
|------------------------------------------------------------------------------------------------------------|-------------------------------|------------|---------------------------|-------|-------------------------|-------------|
|                                                                                                            | Regression Coefficient (B)    | Std. Error | Beta                      |       | Lower Limit             | Upper Limit |
| <b>Baseline adherence score</b>                                                                            |                               |            |                           |       |                         |             |
| Infected persons (1) vs. Contact persons (2)                                                               | -0.030                        | 0.003      | -0.102                    | <.001 | -0.037                  | -0.024      |
| Age (years)                                                                                                | 0.001                         | <0.001     | 0.055                     | <.001 | <0.001                  | 0.001       |
| Having Children (yes=1; no=2)                                                                              | -0.011                        | 0.004      | -0.037                    | .008  | -0.019                  | -0.003      |
| It was explained to me in an understandable way how to behave in quarantine. *                             | 0.051                         | 0.004      | 0.136                     | <.001 | 0.043                   | 0.060       |
| I think the isolation/ quarantine measures are too strict. *                                               | -0.016                        | 0.004      | -0.049                    | <.001 | -0.024                  | -0.009      |
| I think the isolation/ quarantine measures are too lax. *                                                  | -0.011                        | 0.004      | -0.033                    | .004  | -0.019                  | -0.004      |
| When I isolate/ quarantine myself, I am protecting other members of my household. *                        | 0.015                         | 0.004      | 0.046                     | <.001 | 0.007                   | 0.022       |
| When I isolate/ quarantine myself, I am protecting our society from a further spread of the coronavirus. * | 0.049                         | 0.013      | 0.045                     | <.001 | 0.024                   | 0.073       |
| People in my professional and social environment have expected me to implement the quarantine measures. *  | 0.037                         | 0.006      | 0.069                     | <.001 | 0.025                   | 0.049       |
| I experienced difficulties in obtaining everyday necessities during isolation/quarantine *                 | -0.014                        | 0.004      | -0.042                    | <.001 | -0.022                  | -0.006      |
| <b>Household adherence score</b>                                                                           |                               |            |                           |       |                         |             |
| Infected persons (1) vs. Contact persons (2)                                                               | -0.052                        | 0.010      | -0.103                    | <.001 | -0.072                  | -0.032      |
| Age (years)                                                                                                | 0.002                         | <0.001     | 0.108                     | <.001 | 0.001                   | 0.003       |
| Sex (female=1; male=2)                                                                                     | 0.022                         | 0.010      | 0.043                     | .030  | 0.002                   | 0.042       |
| Migration background (no= 1; yes=2)                                                                        | 0.064                         | 0.022      | 0.058                     | .004  | 0.021                   | 0.107       |
| Socioeconomic status (SES) (high=1; middle and low=2)                                                      | -0.028                        | 0.012      | -0.045                    | .025  | -0.052                  | -0.004      |
| Married/ living in a Relationship (no=1; yes=2)                                                            | 0.062                         | 0.014      | 0.099                     | <.001 | 0.035                   | 0.090       |

|                                                                                                                   |        |       |        |       |        |        |
|-------------------------------------------------------------------------------------------------------------------|--------|-------|--------|-------|--------|--------|
| <b>Having Children (yes=1; no=2)</b>                                                                              | -0.029 | 0.013 | -0.058 | .028  | -0.054 | -0.003 |
| <b>I think the coronavirus is dangerous. *</b>                                                                    | 0.059  | 0.023 | 0.052  | .011  | 0.014  | 0.104  |
| <b>I have been given clear information about the reason for the isolation/quarantine. *</b>                       | 0.042  | 0.017 | 0.060  | .014  | 0.009  | 0.076  |
| <b>It was explained to me in an understandable way how to behave in quarantine. *</b>                             | 0.031  | 0.016 | 0.047  | .051  | <0.001 | 0.063  |
| <b>When I isolate/ quarantine myself, I am protecting other members of my household. *</b>                        | 0.145  | 0.012 | 0.240  | <.001 | 0.121  | 0.169  |
| <b>When I isolate/ quarantine myself, I am protecting our society from a further spread of the coronavirus. *</b> | 0.074  | 0.041 | 0.037  | .072  | -0.007 | 0.154  |
| <b>I suffered financial losses due to the isolation/quarantine (yes=1; no=2)</b>                                  | -0.021 | 0.012 | -0.034 | .090  | -0.045 | 0.003  |

## DISCUSSION

To our knowledge, this study is one of the first studies in Germany of adherence to recommendations while in official domestic isolation or quarantine during the Covid-19 pandemic. The study showed that the measures for seclusion from the public were especially well implemented with a mean adherence of 92.8%. Adherence to measures requiring distancing from other household members was lower, at 68.8%. The measures calling for seclusion in a single room and keeping a distance of 1.5 m from other household members were both particularly difficult to implement. By contrast, regular airing and washing of hands, as well as avoiding contact with delivery and postal workers, were easier.

Non-influenceable factors, including demographic factors such as gender, age, education level and status as an IP, affected levels of adherence. In the present study, men were more adherent than women, older people more adherent than younger people and IPs more adherent than CPs. Al-Hanawi et al., Al-Zabadi et al. and Park et al. also showed higher adherence among older people in survey studies on the implementation of social distancing measures in the general population, as did Smith et al. in a study on self-isolation at the onset of Covid-19 symptoms in a British cohort. [4, 12, 27, 28] However, in all four studies, women were more likely to implement the relevant measures. Why men performed better on HBRs in our study can only be speculated here. As the Mannheim-Corona study by Blom et al. suggests, women (still) feel more obliged to take on household tasks even during quarantine.[29] Smith et al. showed lower adherence in their study among subjects with younger children in the household. However, the only criterion for adherent behaviour in their study was whether the subjects left their home.[12] Our study found a positive correlation between the presence of children in the household and greater adherence, accounting for all relevant isolation/quarantine recommendations. Subjects with children in the household implemented the HBRs significantly better than did subjects without children at home. The reason for this could be the high motivation of many parents to protect their children from infection.

In addition, it was shown that individual and, above all, influenceable perceptions affected adherence. According to Rosenstock's Health Belief Model for predicting health-related behaviour, in addition to the perceived risks associated with a given disease, the assumed costs and benefits of different behaviours also have an influence on the extent of behavioural

1  
2  
3 change.[26] Subjects who stated that they had been clearly informed about both the reason  
4 for their isolation or quarantine and the scope of the measures mandated, showed greater  
5 adherence to the measures. Adherence was also positively influenced by the assessment of  
6 the measures as appropriate, as well as the perception of social pressure in relation to their  
7 implementation. The perception that Covid-19 is dangerous had a further positive influence  
8 on household adherence. In cross-sectional studies of perceptions of the coronavirus and  
9 social distancing measures, Hills et al. and Al Sabbagh et al. found that the perceived  
10 dangerousness of infection and identifying oneself as belonging to a risk group were both  
11 associated with higher adherence.[5, 30] While Al Sabbagh et al. also found that a perceived  
12 financial disadvantage related to social distancing measures correlated with lower adherence,  
13 the present study associated higher expenditures or financial losses due to isolation or  
14 quarantine with higher household adherence.[30] This fact could be explained by a certain  
15 retrospective aspect of our study: Those who adhered more strictly to the measures may – as  
16 a result – have had higher costs, e.g. for hygiene items or delivery services.  
17  
18  
19  
20

### 21 **Strengths and limitations**

22 A particular strength of this survey was the large, homogeneous cohort and the detailed  
23 consideration of the various recommendations, taking motivation into account. Even though  
24 this survey was limited to the catchment area of the largest health department in Germany,  
25 the measures were largely uniform across Germany, and the approaches taken by the various  
26 health departments were comparable. This makes it quite likely that the findings can reliably  
27 be transferred to other urban regions. One limitation, however, was the online format, which  
28 could have prevented older participants, particularly those who are less computer-savvy, from  
29 participating. However, the average age of the study participants, at 40.9 years, is 13 months  
30 below the average age of the Cologne population.[31] Furthermore, when interpreting the  
31 results, it must be taken into account that citizens placed under isolation/quarantine orders  
32 were informed that non-compliance with certain measures, especially leaving one's own  
33 home, could be punished. Even though the anonymity of participation was explicitly  
34 mentioned in our survey, it cannot be ruled out that the threat of punishment led to desired  
35 and less honest answers. Moreover, it is plausible that more of those who complied with the  
36 prescribed measures took part in the survey.  
37  
38  
39  
40  
41

### 42 **CONCLUSIONS**

43 In summary, adherence was quite high overall, especially with regard to the general  
44 isolation/quarantine rules. However, with high infection rates in households with an index  
45 case in the past and the comparatively lower adherence to isolation and quarantine within  
46 one household found in this study, it still seems sensible to develop more strategies for  
47 increasing adherence, particularly within households.[10] The pandemic has been ongoing for  
48 more than two years, and with the emergence of new viral variants such as Omicron, an  
49 associated weakened vaccine effectiveness and a still-significant number of unvaccinated  
50 people, the importance of non-drug measures is clear. As Telenti et al. have indicated,  
51 responsible management of Covid-19 will continue to be relevant in the future.[32] Thus, to  
52 support staff in health offices in their care of citizens, adequate education on the benefits of  
53 quarantine measures should be implemented in the public sphere. This might also lead to an  
54 increase in adherence, especially within a household. The approach to successful risk  
55 communication outlined by Loss et al, which include credible messages, acknowledgement of  
56 uncertainties and a balance of reassurance and alarm, combined with continuous monitoring  
57  
58  
59  
60



1  
2  
3 and evaluation, could be used as a guide in order to prevent fatigue in future pandemics and  
4 in the ongoing development of Covid-19.[33]  
5  
6

### 7 **Author Contributions**

8 CJ, AK, JN and GAW conducted the study on behalf of the CoCo-Fakt study group, JB conducted  
9 the questions regarding the quarantine recommendations, CJ and JB conducted the statistical  
10 analyses, AK, CJ and JB contributed to interpreting the results, JB wrote the original draft of  
11 the manuscript, AK, CJ, GAW, BG, LB, and JN provided comments and inputs to revise the  
12 manuscript.  
13  
14

### 15 **Competing interests**

16 None declared.  
17  
18

### 19 **Funding**

20 The authors have not declared a specific grant for this research from any funding agency in  
21 the public, commercial or not-for-profit sectors.  
22  
23

### 24 **Data sharing statement**

25 Data are available on reasonable request.  
26  
27

### 28 **Acknowledgements**

29 The authors would like to thank Nikola Schmidt for her support with the programming of the  
30 online survey. Additionally, they would also like to thank everyone who helped with the  
31 pretest and who participated in the survey.  
32  
33

### 34 **Ethics approval**

35 This study involves human participants. Ethics approval was obtained from the Rheinisch-  
36 Westfälische Technische Hochschule Aachen Human Ethics Research Committee (351/20).  
37  
38

### 39 **Patient consent for publication**

40 Not required.  
41  
42

## 43 **REFERENCES**

- 44 1 Nussbaumer-Streit B, Mayr V, Dobrescu AI, et al. Quarantine alone or in combination  
45 with other public health measures to control COVID-19: a rapid review. *Cochrane*  
46 *Database Syst Rev* 2020;4:CD013574.
- 47 2 Webster RK, Brooks SK, Smith LE, et al. How to improve adherence with quarantine:  
48 rapid review of the evidence. *Public Health* 2020;182:163–69.
- 49 3 Jarvis CI, van Zandvoort K, Gimma A, et al. Quantifying the impact of physical distance  
50 measures on the transmission of COVID-19 in the UK. *BMC Med* 2020;18(1):124.  
51 doi:10.1186/s12916-020-01597-8 [published Online First: 7 May 2020].
- 52 4 Al-Hanawi MK, Angawi K, Alshareef N, et al. Knowledge, Attitude and Practice Toward  
53 COVID-19 Among the Public in the Kingdom of Saudi Arabia: A Cross-Sectional Study.  
54 *Front Public Health* 2020;8:217. doi:10.3389/fpubh.2020.00217 [published Online First:  
55 27 May 2020].
- 56 5 Hills S, Eraso Y. Factors associated with non-adherence to social distancing rules during  
57 the COVID-19 pandemic: a logistic regression analysis. *BMC Public Health*  
58  
59  
60

- 2021;21(1):352. doi:10.1186/s12889-021-10379-7 [published Online First: 13 February 2021].
- 6 Clark C, Davila A, Regis M, et al. Predictors of COVID-19 voluntary compliance behaviors: An international investigation. *Glob Transit* 2020;76–82. doi:10.1016/j.glt.2020.06.003 [published Online First: 26 June 2020].
- 7 Crane MA, Shermock KM, Omer SB, et al. Change in Reported Adherence to Nonpharmaceutical Interventions During the COVID-19 Pandemic, April–November 2020. *JAMA* 2021;325(9):883–85.
- 8 Lüdecke D, Knesebeck O von dem. Protective Behavior in Course of the COVID-19 Outbreak—Survey Results From Germany. *Front Public Health* 2020;8:572561. doi:10.3389/fpubh.2020.572561 [published Online First: 24 September 2020].
- 9 Szwarcwald CL, Souza Júnior PRB de, Malta DC, et al. Adesão às medidas de restrição de contato físico e disseminação da COVID-19 no Brasil. *Epidemiol Serv Saude* 2020;29(5):e2020432.
- 10 Madewell ZJ, Yang Y, Longini IM, et al. Household Transmission of SARS-CoV-2: A Systematic Review and Meta-analysis. *JAMA Netw Open* 2020;3(12):e2031756. doi:10.1001/jamanetworkopen.2020.31756 [published Online First: 1 December 2020].
- 11 Carlsen EØ, Caspersen IH, Trogstad L, et al. Public adherence to governmental recommendations regarding quarantine and testing for COVID-19 in two Norwegian cohorts. medRxiv 20248405. [Preprint]. December 20, 2020 [cited 2022 March 23] <https://doi.org/10.1101/2020.12.18.20248405>
- 12 Smith LE, Potts HWW, Amlôt R, et al. Adherence to the test, trace, and isolate system in the UK: results from 37 nationally representative surveys. *BMJ* 2021;372:n608. doi:10.1136/bmj.n608 [published Online First: 31 March 2021].
- 13 Verberk JDM, Anthierens SA, Tonkin-Crine S, et al. Experiences and needs of persons living with a household member infected with SARS-CoV-2: A mixed method study. *PLoS ONE* 2021;16(3):e0249391. doi:10.1371/journal.pone.0249391 [published Online First: 31 March 2021].
- 14 Hsu L, Grüne B, Buess M, et al. COVID-19 Breakthrough Infections and Transmission Risk: Real-World Data Analyses from Germany's Largest Public Health Department (Cologne). *Vaccines (Basel)* 2021;9(11). doi:10.3390/vaccines9111267 [published Online First: 2 November 2021].
- 15 Andrews N, Stowe J, Kirsebom F, et al. Covid-19 Vaccine Effectiveness against the Omicron (B.1.1.529) Variant. *N Engl J Med* 2022. doi:10.1056/NEJMoa2119451 [published Online First: 2 March 2022].
- 16 Joisten C, Kossow A, Book J, et al. How to manage quarantine-adherence, psychosocial consequences, coping strategies and lifestyle of patients with COVID-19 and their confirmed contacts: study protocol of the CoCo-Fakt surveillance study, Cologne, Germany. *BMJ Open* 2021;11(4):e048001. doi:10.1136/bmjopen-2020-048001 [published Online First: 13 April 2021].
- 17 Betsch C, Wieler L, Bosnjak M, et al. Germany COVID-19 Snapshot MOnitoring (COSMO Germany): Monitoring knowledge risk perceptions preventive behaviours and public trust in the current coronavirus outbreak in Germany 2020. Available at: <https://psycharchives.org/en/item/e5acdc65-77e9-4fd4-9cd2-bf6aa2dd5eba> Accessed March 15, 2022.

- 1  
2  
3 18 Neuhann F, Buess M, Wolff A, et al. Entwicklung einer Software zur Unterstützung der  
4 Prozesse im Gesundheitsamt der Stadt Köln in der SARS-CoV-2-Pandemie, Digitales  
5 Kontaktmanagement (DiKoMa). *Epidemiologisches Bulletin* 2020;2020(23):3–11.  
6  
7 19 Lange C, Jentsch F, Allen J, et al. Data Resource Profile: German Health Update (GEDA)--  
8 the health interview survey for adults in Germany. *Int J Epidemiol* 2015;44(2):442–50.  
9 doi:10.1093/ije/dyv067 [published Online First: 15 May 2015].  
10  
11 20 World Health Organization. Home care for patients with suspected or confirmed  
12 COVID-19 and management of their contacts 2020. Available at:  
13 [https://www.who.int/publications/i/item/home-care-for-patients-with-suspected-](https://www.who.int/publications/i/item/home-care-for-patients-with-suspected-novel-coronavirus-(ncov)-infection-presenting-with-mild-symptoms-and-management-of-contacts)  
14 [novel-coronavirus-\(ncov\)-infection-presenting-with-mild-symptoms-and-management-](https://www.who.int/publications/i/item/home-care-for-patients-with-suspected-novel-coronavirus-(ncov)-infection-presenting-with-mild-symptoms-and-management-of-contacts)  
15 [of-contacts](https://www.who.int/publications/i/item/home-care-for-patients-with-suspected-novel-coronavirus-(ncov)-infection-presenting-with-mild-symptoms-and-management-of-contacts) Accessed March 15, 2022.  
16  
17 21 European Centre for Disease Prevention and Control. Infection prevention and control  
18 in the household management of people with suspected or confirmed coronavirus  
19 disease (COVID-19) 2020. Available at:  
20 [https://www.ecdc.europa.eu/sites/default/files/documents/Home-care-of-COVID-19-](https://www.ecdc.europa.eu/sites/default/files/documents/Home-care-of-COVID-19-patients-2020-03-31.pdf)  
21 [patients-2020-03-31.pdf](https://www.ecdc.europa.eu/sites/default/files/documents/Home-care-of-COVID-19-patients-2020-03-31.pdf) Accessed March 15, 2022.  
22  
23 22 Robert Koch-Institut. Häusliche Isolierung bei bestätigter COVID-19-Erkrankung 2021.  
24 Available at:  
25 [https://www.rki.de/DE/Content/InfAZ/N/Neuartiges\\_Coronavirus/Flyer\\_Patienten.pdf?](https://www.rki.de/DE/Content/InfAZ/N/Neuartiges_Coronavirus/Flyer_Patienten.pdf?__blob=publicationFile)  
26 [\\_\\_blob=publicationFile](https://www.rki.de/DE/Content/InfAZ/N/Neuartiges_Coronavirus/Flyer_Patienten.pdf?__blob=publicationFile) Accessed March 15, 2022.  
27  
28 23 Kaduszkiewicz H, Kochen M, Pömsl J. Handlungsempfehlung Häusliche Isolierung von  
29 CoViD-19-Fällen mit leichtem Krankheitsbild und Verdachtsfällen 2020. Available at:  
30 [https://www.degam.de/files/Inhalte/Leitlinien-Inhalte/Dokumente/DEGAM-S1-](https://www.degam.de/files/Inhalte/Leitlinien-Inhalte/Dokumente/DEGAM-S1-Handlungsempfehlung/053-054%20SARS-CoV-2%20und%20Covid-19/Publikationsdokumente%20Archiv/053-054_Empfehlungen%20Haeusliche_Isolierung.pdf)  
31 [Handlungsempfehlung/053-054%20SARS-CoV-2%20und%20Covid-](https://www.degam.de/files/Inhalte/Leitlinien-Inhalte/Dokumente/DEGAM-S1-Handlungsempfehlung/053-054%20SARS-CoV-2%20und%20Covid-19/Publikationsdokumente%20Archiv/053-054_Empfehlungen%20Haeusliche_Isolierung.pdf)  
32 [19/Publikationsdokumente%20Archiv/053-](https://www.degam.de/files/Inhalte/Leitlinien-Inhalte/Dokumente/DEGAM-S1-Handlungsempfehlung/053-054%20SARS-CoV-2%20und%20Covid-19/Publikationsdokumente%20Archiv/053-054_Empfehlungen%20Haeusliche_Isolierung.pdf)  
33 [054\\_Empfehlungen%20Haeusliche\\_Isolierung.pdf](https://www.degam.de/files/Inhalte/Leitlinien-Inhalte/Dokumente/DEGAM-S1-Handlungsempfehlung/053-054%20SARS-CoV-2%20und%20Covid-19/Publikationsdokumente%20Archiv/053-054_Empfehlungen%20Haeusliche_Isolierung.pdf) Accessed March 15, 2022.  
34  
35 24 Wang CC, Prather KA, Sznitman J, et al. Airborne transmission of respiratory viruses.  
36 *Science* 2021;373(6558).  
37  
38 25 German Federal Ministry of Health, Public Relations Division. Together against corona:  
39 How to protect ourselves against the coronavirus 2021. Available at:  
40 [https://assets.zusammengegencorona.de/eaae45wp4t29/59kagmqA8AWs87Jo2VgpTf/](https://assets.zusammengegencorona.de/eaae45wp4t29/59kagmqA8AWs87Jo2VgpTf/f826234fc4d8d58a891c9d159d2627aa/BMG_Infoflyer_kurz_Corona_English.pdf)  
41 [f826234fc4d8d58a891c9d159d2627aa/BMG\\_Infoflyer\\_kurz\\_Corona\\_English.pdf](https://assets.zusammengegencorona.de/eaae45wp4t29/59kagmqA8AWs87Jo2VgpTf/f826234fc4d8d58a891c9d159d2627aa/BMG_Infoflyer_kurz_Corona_English.pdf)  
42 Accessed March 15, 2022.  
43  
44 26 Rosenstock IM. The Health Belief Model and Preventive Health Behavior. *Health*  
45 *Education Monographs* 1974;2(4):354–86.  
46  
47 27 Al Zabadi H, Yaseen N, Alhroub T, et al. Assessment of Quarantine Understanding and  
48 Adherence to Lockdown Measures During the COVID-19 Pandemic in Palestine:  
49 Community Experience and Evidence for Action. *Front Public Health* 2021;9:570242.  
50 doi:10.3389/fpubh.2021.570242 [published Online First: 2 March 2021].  
51  
52 28 Park CL, Russell BS, Fendrich M, et al. Americans' COVID-19 Stress, Coping, and  
53 Adherence to CDC Guidelines. *J Gen Intern Med* 2020.  
54  
55 29 Blom AG, Cornesse C, Friedel S, et al. Mannheimer Corona-Studie: GESIS Data Archive  
56 2021.  
57  
58 30 Al-Sabbagh MQ, Al-Ani A, Mafrachi B, et al. Predictors of adherence with home  
59 quarantine during COVID-19 crisis: the case of health belief model. *Psychol Health Med*  
60 2021;1–13. doi:10.1080/13548506.2021.1871770 [published Online First: 11 January 2021].

- 1  
2  
3 31 Stadt Köln - Amt für Stadtentwicklung und Statistik. Kölner Zahlenspiegel 2020 2020.  
4 Available at: [https://www.stadt-koeln.de/mediaasset/content/pdf15/statistik-  
6 standardinformationen/k%C3%B6lner\\_zahlenspiegel\\_2020\\_deutsch.pdf](https://www.stadt-koeln.de/mediaasset/content/pdf15/statistik-<br/>5 standardinformationen/k%C3%B6lner_zahlenspiegel_2020_deutsch.pdf) Accessed  
7 March 15, 2022.
- 8 32 Telenti A, Arvin A, Corey L, et al. After the pandemic: perspectives on the future  
9 trajectory of COVID-19. *Nature* 2021;596(7873):495–504. doi:10.1038/s41586-021-  
10 03792-w [published Online First: 8 July 2021].
- 11 33 Loss J, Boklage E, Jordan S, et al. Risikokommunikation bei der Eindämmung der COVID-  
12 19-Pandemie: Herausforderungen und Erfolg versprechende Ansätze.  
13 *Bundesgesundheitsblatt Gesundheitsforschung Gesundheitsschutz* 2021;64(3):294–303.  
14 doi:10.1007/s00103-021-03283-3 [published Online First: 9 February 2021].  
15  
16  
17  
18  
19  
20  
21  
22  
23  
24  
25  
26  
27  
28  
29  
30  
31  
32  
33  
34  
35  
36  
37  
38  
39  
40  
41  
42  
43  
44  
45  
46  
47  
48  
49  
50  
51  
52  
53  
54  
55  
56  
57  
58  
59  
60

**FOOTNOTES**

I, the Submitting Author has the right to grant and does grant on behalf of all authors of the Work (as defined in the below author licence), an exclusive licence and/or a non-exclusive licence for contributions from authors who are: i) UK Crown employees; ii) where BMJ has agreed a CC-BY licence shall apply, and/or iii) in accordance with the terms applicable for US Federal Government officers or employees acting as part of their official duties; on a worldwide, perpetual, irrevocable, royalty-free basis to BMJ Publishing Group Ltd ("BMJ") its licensees and where the relevant Journal is co-owned by BMJ to the co-owners of the Journal, to publish the Work in BMJ Global Health and any other BMJ products and to exploit all rights, as set out in our [licence](#).

The Submitting Author accepts and understands that any supply made under these terms is made by BMJ to the Submitting Author unless you are acting as an employee on behalf of your employer or a postgraduate student of an affiliated institution which is paying any applicable article publishing charge ("APC") for Open Access articles. Where the Submitting Author wishes to make the Work available on an Open Access basis (and intends to pay the relevant APC), the terms of reuse of such Open Access shall be governed by a Creative Commons licence – details of these licences and which [Creative Commons](#) licence will apply to this Work are set out in our licence referred to above.

Legends:

Figure 1: Participants-Flow Chart

Figure 2: Relative distribution of implementation (left) and difficulty (right) of selected recommendations in domestic isolation and quarantine; separated for infected persons (IP) and their contacts (CP)

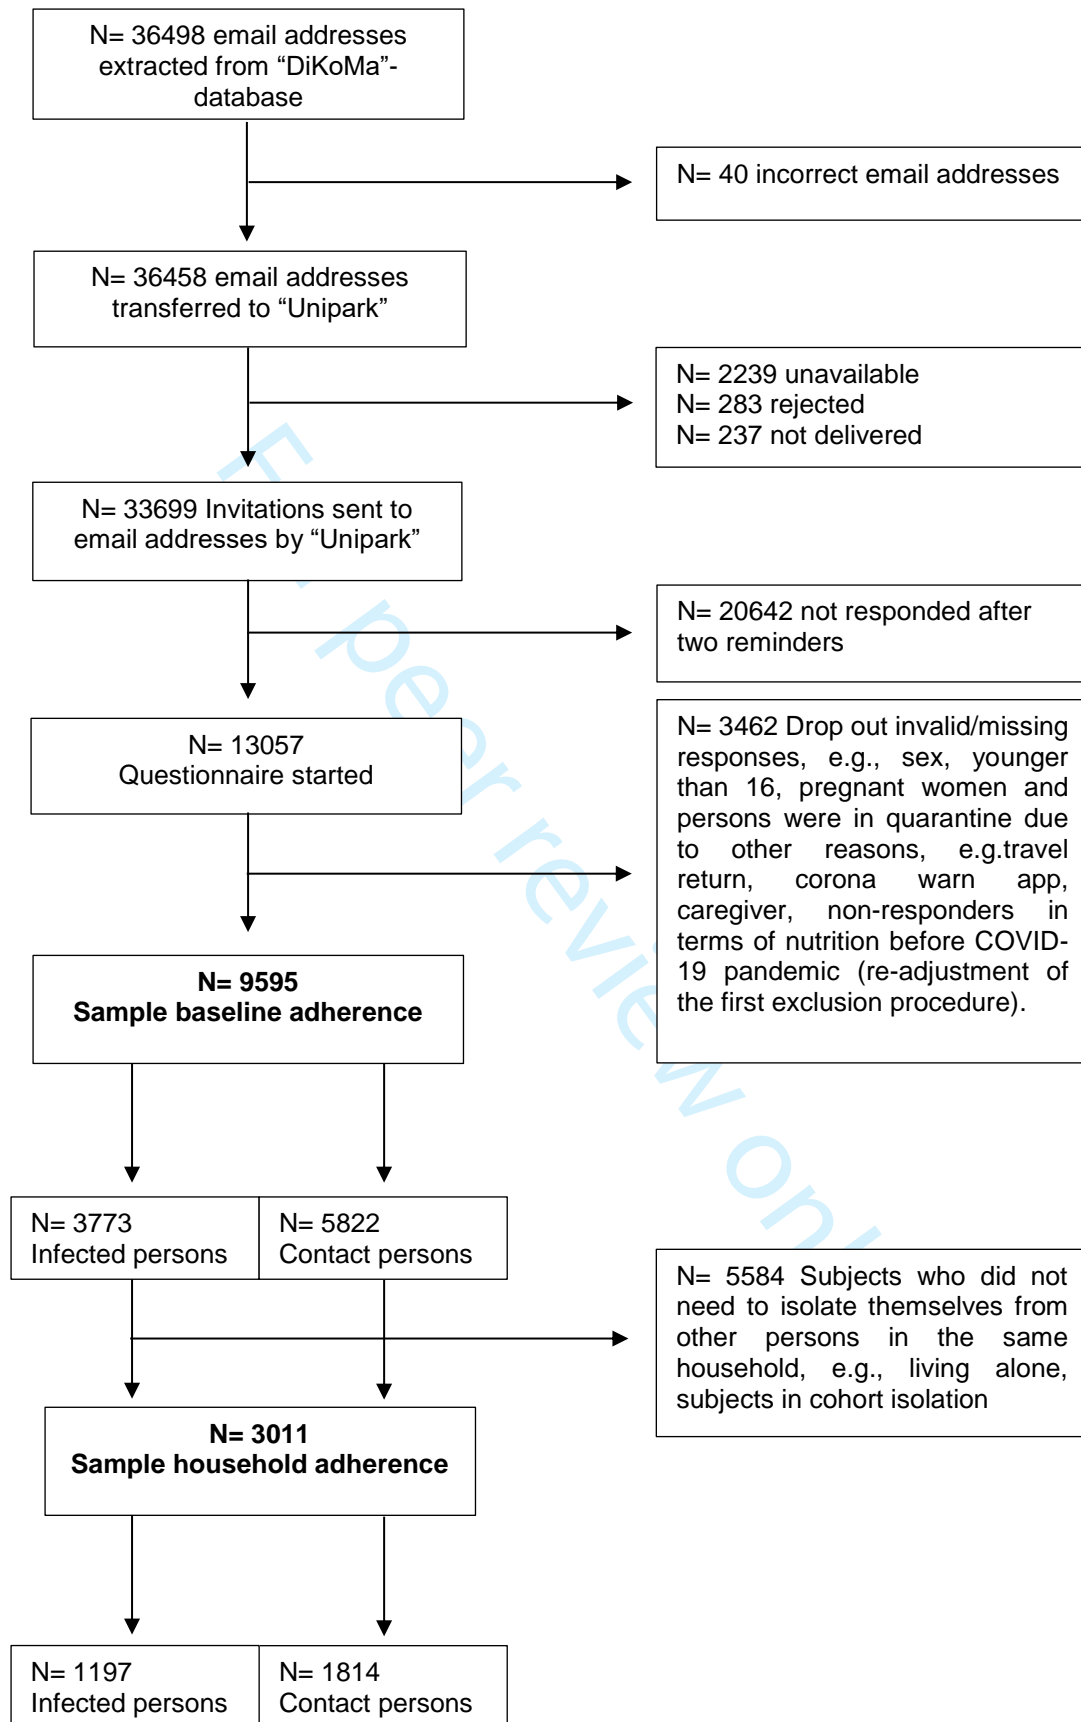

Staying at home

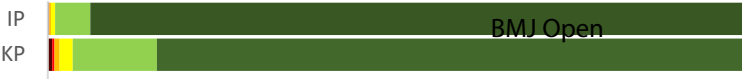

BMJ Open

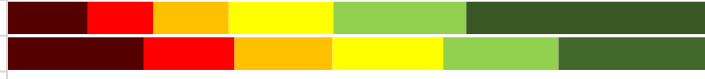

1

Not receiving visitors

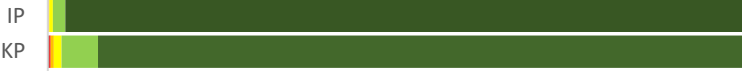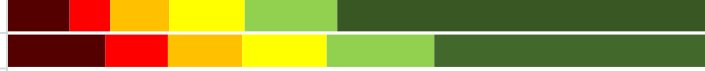

2

3

4

No contact with delivery services

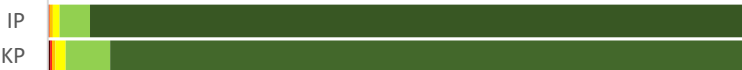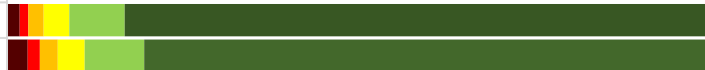

5

6

7

Staying in a single room

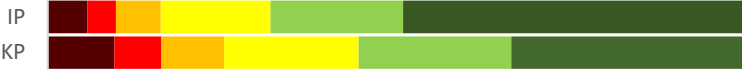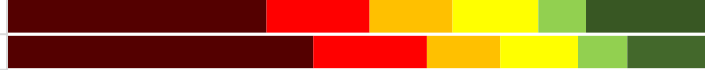

8

9

10

Keeping a distance of 1.5 m

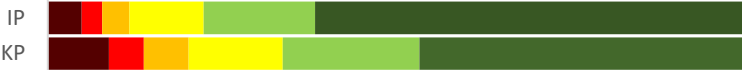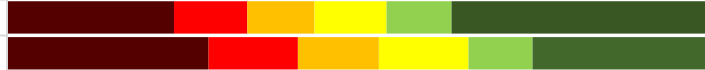

11

12

13

14

Wearing a mask

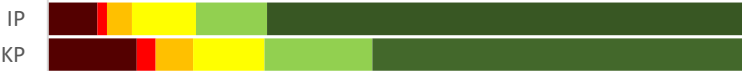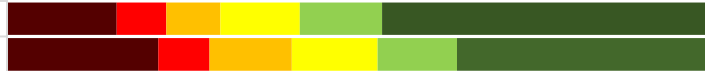

15

16

17

Regular ventilation

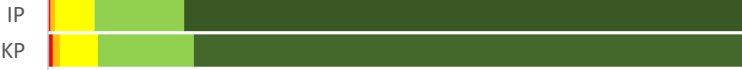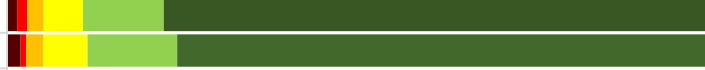

18

19

20

Hand hygiene

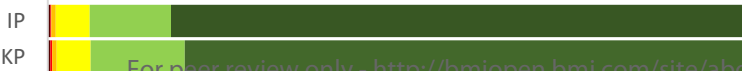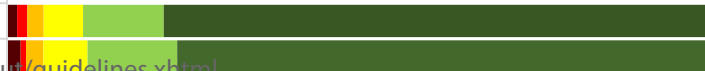

21

22

23

For peer review only - <http://bmjopen.bmj.com/site/about/guidelines.xhtml>

24

25

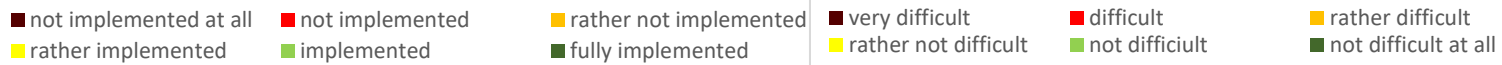

**SUPPLEMENTARY MATERIAL****Adherence to stay-at-home orders: awareness, implementation and difficulties of the officially ordered quarantine measures in the context of the SARS-CoV2 pandemic in Cologne - a cross-sectional cohort study**

---

| <b>Table of contents</b> |                                                                                                                        |        |
|--------------------------|------------------------------------------------------------------------------------------------------------------------|--------|
| <b>Table S1</b>          | Awareness of isolation/quarantine recommendations                                                                      | Page 2 |
| <b>Table S2</b>          | Implementation of isolation/quarantine recommendations                                                                 | Page 3 |
| <b>Table S3</b>          | Difficulty of isolation/quarantine recommendations                                                                     | Page 4 |
| <b>Table S4</b>          | Views on Covid-19 in relation to quarantine                                                                            | Page 5 |
| <b>Table S5</b>          | Distribution of the baseline adherence score                                                                           | Page 6 |
| <b>Table S6</b>          | Distribution of the household adherence score                                                                          | Page 6 |
| <b>Table S7</b>          | Factors influencing the baseline and household adherence score; Baseline models of linear backward regression analyses | Page 7 |



Table S1: Awareness of isolation/quarantine recommendations. \*(yes=1; no=2); CBR=Community based recommendation; HBR= Household based recommendation

| Recommendation |                                                                                                                            | Infected persons |              |      | Contact persons |              |      | p-value |       |
|----------------|----------------------------------------------------------------------------------------------------------------------------|------------------|--------------|------|-----------------|--------------|------|---------|-------|
|                |                                                                                                                            | N                | Mean value * | SD   | N               | Mean value * | SD   |         |       |
| 1              | Do not leave your home.                                                                                                    | CBR              | 3773         | 1.01 | 0.11            | 5822         | 1.02 | 0.14    | .003  |
| 2              | Do not receive visitors.                                                                                                   | CBR              | 3773         | 1.01 | 0.10            | 5822         | 1.02 | 0.12    | .009  |
| 3              | Avoid personal contact with postal and delivery workers and have deliveries left outside the house or flat entrance.       | CBR              | 3773         | 1.07 | 0.25            | 5822         | 1.12 | 0.32    | <.001 |
| 4              | Stay apart from other household members in a single room.                                                                  | HBR              | 1184         | 1.06 | 0.24            | 1801         | 1.11 | 0.32    | <.001 |
| 5              | Sleep separately from other household members in a single room.                                                            | HBR              | 1182         | 1.12 | 0.33            | 1792         | 1.20 | 0.40    | <.001 |
| 6              | Have contact with other household members only when you need their help.                                                   | HBR              | 1173         | 1.19 | 0.39            | 1783         | 1.29 | 0.45    | <.001 |
| 7              | Keep at least a 1.5m distance when in contact with other household members.                                                | HBR              | 1154         | 1.11 | 0.32            | 1772         | 1.16 | 0.37    | <.001 |
| 8              | Wear a mouth-nose mask when in contact with other household members.                                                       | HBR              | 1152         | 1.26 | 0.44            | 1767         | 1.37 | 0.48    | <.001 |
| 9              | Take your meals in a different room from other household members.                                                          | HBR              | 1145         | 1.20 | 0.40            | 1750         | 1.29 | 0.46    | <.001 |
| 10             | Use the bathroom, hallway, kitchen and other common areas only when absolutely necessary.                                  | HBR              | 1144         | 1.19 | 0.39            | 1741         | 1.28 | 0.45    | <.001 |
| 11             | Use only one toilet. The rest of the household members should not use this toilet.                                         | HBR              | 604          | 1.20 | 0.40            | 940          | 1.32 | 0.47    | <.001 |
| 12             | The bathroom you use should be cleaned at least once a day.                                                                | HBR              | 1142         | 1.47 | 0.50            | 1742         | 1.57 | 0.50    | <.001 |
| 13             | Surfaces you frequently touch (bedside table, door handles, smartphone, work surfaces, etc.) should be cleaned once a day. | HBR              | 1133         | 1.38 | 0.49            | 1729         | 1.48 | 0.50    | <.001 |
| 14             | Air all rooms regularly.                                                                                                   | HBR              | 1130         | 1.08 | 0.27            | 1729         | 1.10 | 0.30    | .160  |
| 15             | Sneeze into the crook of your elbow or a disposable handkerchief.                                                          | HBR              | 1124         | 1.03 | 0.16            | 1723         | 1.02 | 0.14    | .327  |
| 16             | Wash your hands regularly for at least 20 seconds, especially after blowing your nose or sneezing.                         | HBR              | 1117         | 1.05 | 0.23            | 1715         | 1.05 | 0.21    | .357  |
| 17             | Collect tissues, gloves and other rubbish in a lidded bin in your room.                                                    | HBR              | 1112         | 1.56 | 0.50            | 1707         | 1.61 | 0.49    | .018  |
| 18             | After washing your hands, use paper towels or a towel that only you use, and change it daily.                              | HBR              | 1107         | 1.35 | 0.48            | 1685         | 1.44 | 0.50    | <.001 |
| 19             | Wash your clothes at a minimum of 60 degrees and separately from the laundry of other household members.                   | HBR              | 1107         | 1.63 | 0.48            | 1693         | 1.69 | 0.46    | <.001 |

Table S2: Implementation of isolation/quarantine recommendations. **\*\***(not implemented at all=1; fully implemented=2); CBR=Community based recommendation; HBR= Household based recommendation

| Recommendation                                                                                                                | Infected persons |                  |      | Contact persons |                  |      | P-value |       |
|-------------------------------------------------------------------------------------------------------------------------------|------------------|------------------|------|-----------------|------------------|------|---------|-------|
|                                                                                                                               | N                | Mean value<br>** | SD   | N               | Mean value<br>** | SD   |         |       |
| 1 Do not leave your home.                                                                                                     | CBR              | 3710             | 5.92 | 0.37            | 5656             | 5.78 | 0.65    | <.001 |
| 2 Do not receive visitors.                                                                                                    | CBR              | 3724             | 5.96 | 0.26            | 5703             | 5.89 | 0.46    | <.001 |
| 3 Avoid personal contact with postal and delivery workers and have deliveries left outside the house or flat entrance.        | CBR              | 3497             | 5.91 | 0.42            | 5090             | 5.86 | 0.52    | <.001 |
| 4 Stay apart from other household members in a single room.                                                                   | HBR              | 1105             | 4.85 | 1.47            | 1590             | 4.38 | 1.62    | <.001 |
| 5 Sleep separately from other household members in a single room.                                                             | HBR              | 1031             | 5.49 | 1.33            | 1418             | 5.00 | 1.82    | <.001 |
| 6 Have contact with other household members only when you need their help.                                                    | HBR              | 936              | 5.29 | 1.33            | 1261             | 4.95 | 1.55    | <.001 |
| 7 Keep at least a 1.5m distance when in contact with other household members.                                                 | HBR              | 1010             | 5.15 | 1.38            | 1474             | 4.70 | 1.62    | <.001 |
| 8 Wear a mouth-nose mask when in contact with other household members.                                                        | HBR              | 846              | 5.20 | 1.47            | 1104             | 4.73 | 1.75    | <.001 |
| 9 Take your meals in a different room from other household members.                                                           | HBR              | 908              | 5.12 | 1.53            | 1230             | 4.56 | 1.86    | <.001 |
| 10 Use the bathroom, hallway, kitchen and other common areas only when absolutely necessary.                                  | HBR              | 922              | 5.06 | 1.47            | 1239             | 4.55 | 1.77    | <.001 |
| 11 Use only one toilet. The rest of the household members should not use this toilet.                                         | HBR              | 482              | 5.52 | 1.20            | 633              | 5.37 | 1.37    | .057  |
| 12 The bathroom you use should be cleaned at least once a day.                                                                | HBR              | 601              | 5.30 | 1.22            | 741              | 5.18 | 1.34    | .065  |
| 13 Surfaces you frequently touch (bedside table, door handles, smartphone, work surfaces, etc.) should be cleaned once a day. | HBR              | 686              | 5.13 | 1.30            | 902              | 5.00 | 1.37    | .071  |
| 14 Air all rooms regularly.                                                                                                   | HBR              | 1028             | 5.72 | 0.65            | 1556             | 5.69 | 0.70    | .275  |
| 15 Sneeze into the crook of your elbow or a disposable handkerchief.                                                          | HBR              | 1080             | 5.91 | 0.40            | 1681             | 5.88 | 0.47    | .13   |
| 16 Wash your hands regularly for at least 20 seconds, especially after blowing your nose or sneezing.                         | HBR              | 1048             | 5.74 | 0.65            | 1630             | 5.72 | 0.67    | .363  |
| 17 Collect tissues, gloves and other rubbish in a lidded bin in your room.                                                    | HBR              | 485              | 5.64 | 0.95            | 667              | 5.59 | 1.02    | .455  |
| 18 After washing your hands, use paper towels or a towel that only you use, and change it daily.                              | HBR              | 715              | 5.66 | 0.83            | 942              | 5.61 | 0.86    | .230  |
| 19 Wash your clothes at a minimum of 60 degrees and separately from the laundry of other household members.                   | HBR              | 408              | 5.26 | 1.39            | 515              | 5.11 | 1.49    | .118  |

Table S3: Difficulty of isolation/quarantine recommendations. \*\*\*(not difficult at all=1; very difficult=2); CBR=Community based recommendation; HBR=Household based recommendation

| Recommendation |                                                                                                                            | Infected persons |                   |      | Contact persons |                   |      | p-value |       |
|----------------|----------------------------------------------------------------------------------------------------------------------------|------------------|-------------------|------|-----------------|-------------------|------|---------|-------|
|                |                                                                                                                            | N                | Mean value<br>*** | SD   | N               | Mean value<br>*** | SD   |         |       |
| 1              | Do not leave your home.                                                                                                    | CBR              | 3722              | 4.24 | 1.74            | 5686              | 3.60 | 1.81    | <.001 |
| 2              | Do not receive visitors.                                                                                                   | CBR              | 3729              | 4.72 | 1.69            | 5713              | 4.23 | 1.84    | <.001 |
| 3              | Avoid personal contact with postal and delivery workers and have deliveries left outside the house or flat entrance.       | CBR              | 3499              | 5.64 | 0.97            | 5089              | 5.54 | 1.13    | <.001 |
| 4              | Stay apart from other household members in a single room.                                                                  | HBR              | 1102              | 2.89 | 1.89            | 1583              | 2.55 | 1.77    | <.001 |
| 5              | Sleep separately from other household members in a single room.                                                            | HBR              | 1026              | 4.24 | 2.09            | 1409              | 3.91 | 2.17    | <.001 |
| 6              | Have contact with other household members only when you need their help.                                                   | HBR              | 938               | 4.02 | 2.00            | 1256              | 3.70 | 2.02    | <.001 |
| 7              | Keep at least a 1.5m distance when in contact with other household members.                                                | HBR              | 1010              | 3.80 | 2.04            | 1467              | 3.35 | 1.97    | <.001 |
| 8              | Wear a mouth-nose mask when in contact with other household members.                                                       | HBR              | 843               | 4.36 | 1.90            | 1091              | 3.91 | 1.97    | <.001 |
| 9              | Take your meals in a different room from other household members.                                                          | HBR              | 904               | 3.90 | 1.99            | 1224              | 3.47 | 2.00    | <.001 |
| 10             | Use the bathroom, hallway, kitchen and other common areas only when absolutely necessary.                                  | HBR              | 919               | 3.93 | 1.96            | 1233              | 3.49 | 1.99    | <.001 |
| 11             | Use only one toilet. The rest of the household members should not use this toilet.                                         | HBR              | 481               | 5.31 | 1.46            | 627               | 5.20 | 1.50    | .259  |
| 12             | The bathroom you use should be cleaned at least once a day.                                                                | HBR              | 596               | 4.85 | 1.61            | 738               | 4.86 | 1.59    | .905  |
| 13             | Surfaces you frequently touch (bedside table, door handles, smartphone, work surfaces, etc.) should be cleaned once a day. | HBR              | 682               | 4.71 | 1.63            | 899               | 4.64 | 1.61    | .353  |
| 14             | Air all rooms regularly.                                                                                                   | HBR              | 1030              | 5.57 | 0.98            | 1553              | 5.54 | 1.00    | .483  |
| 15             | Sneeze into the crook of your elbow or a disposable handkerchief.                                                          | HBR              | 1079              | 5.81 | 0.73            | 1679              | 5.80 | 0.75    | .824  |
| 16             | Wash your hands regularly for at least 20 seconds, especially after blowing your nose or sneezing.                         | HBR              | 1047              | 5.59 | 0.94            | 1631              | 5.64 | 0.86    | .219  |
| 17             | Collect tissues, gloves and other rubbish in a lidded bin in your room.                                                    | HBR              | 480               | 5.56 | 1.01            | 664               | 5.54 | 1.07    | .675  |
| 18             | After washing your hands, use paper towels or a towel that only you use, and change it daily.                              | HBR              | 716               | 5.56 | 1.00            | 940               | 5.54 | 0.97    | .676  |
| 19             | Wash your clothes at a minimum of 60 degrees and separately from the laundry of other household members.                   | HBR              | 401               | 5.12 | 1.52            | 512               | 4.99 | 1.55    | .177  |

Table S4: Views on Covid-19 in relation to quarantine. Hypothetical factors influencing the use of preventive health measures according to the Health Belief Model with statements adapted to the Covid-19 pandemic and isolation/quarantine. Sample size, mean value of agreement and standard deviation (SD) are shown separately for index persons and contact persons. P-value is given for the t-test for independent samples. \* (1  $\triangleq$  I do not agree at all; 6  $\triangleq$  I fully agree); \*\* (1  $\triangleq$  yes; 2  $\triangleq$  no)

| Influencing factor according to the Health Belief Model | Statement or question adapted to the Covid-19 pandemic and isolation/quarantine                          | Infected persons |            |     | Contact persons |            |     | P-Value |
|---------------------------------------------------------|----------------------------------------------------------------------------------------------------------|------------------|------------|-----|-----------------|------------|-----|---------|
|                                                         |                                                                                                          | N                | Mean value | SD  | N               | Mean value | SD  |         |
| <b>Health Knowledge</b>                                 | I have been given clear information about the reason for the isolation/quarantine.                       | 3742             | 5.3*       | 1.3 | 5786            | 4.8*       | 1.7 | <.001   |
|                                                         | It was explained to me in an understandable way how to behave in isolation/quarantine.                   | 3746             | 5.1*       | 1.4 | 5774            | 4.7*       | 1.7 | <.001   |
| <b>Peer group pressure</b>                              | People in my professional and social environment have expected me to implement the quarantine measures.  | 3706             | 5.5*       | 1.2 | 5732            | 5.3*       | 1.3 | <.001   |
| <b>Threat Perceptions</b>                               | I think the coronavirus is dangerous.                                                                    | 3750             | 5.4*       | 1.1 | 5784            | 5.5*       | 0.9 | <.001   |
| <b>Perceived Benefits</b>                               | When I isolate/quarantine myself, I am protecting myself.                                                | 3685             | 3.7*       | 2.1 | 5730            | 3.9*       | 2.0 | .008    |
|                                                         | When I isolate/ quarantine myself, I am protecting other members of my household.                        | 3712             | 4.6*       | 1.8 | 5725            | 4.4*       | 1.9 | <.001   |
|                                                         | When I isolate/ quarantine myself, I am protecting our society from a further spread of the coronavirus. | 3748             | 5.8*       | 0.7 | 5790            | 5.8*       | 0.7 | <.001   |
| <b>Perceived Barriers</b>                               | I experienced difficulties in obtaining everyday necessities during isolation/quarantine                 | 3748             | 2.4*       | 1.7 | 5781            | 2.3*       | 1.7 | .061    |
|                                                         | I suffered financial losses due to the isolation/quarantine (yes/no)                                     | 3239             | 1.8**      | 0.4 | 4956            | 1.8**      | 0.4 | .271    |
| <b>Expected Result</b>                                  | I think the isolation/ quarantine measures are too strict.                                               | 3724             | 2.2*       | 1.7 | 5757            | 2.5*       | 1.7 | <.001   |
|                                                         | I think the quarantine measures are too lax.                                                             | 3696             | 2.4*       | 1.7 | 5697            | 2.4*       | 1.6 | .200    |

Table S5: Distribution of the baseline adherence score

| Baseline adherence score (%) | Infected persons |      | Contact persons |      | Total |      |
|------------------------------|------------------|------|-----------------|------|-------|------|
|                              | N                | %    | N               | %    | N     | %    |
| <b>0</b>                     | 17               | 0.5  | 51              | 0.9  | 68    | 0.7  |
| <b>&gt;0-20</b>              | 3                | 0.1  | 10              | 0.2  | 13    | 0.1  |
| <b>&gt;20-40</b>             | 24               | 0.6  | 89              | 1.5  | 113   | 1.2  |
| <b>&gt;40-60</b>             | 45               | 1.2  | 214             | 3.7  | 259   | 2.7  |
| <b>&gt;60-80</b>             | 295              | 7.8  | 688             | 11.8 | 983   | 10.2 |
| <b>&gt;80-&lt;100</b>        | 371              | 9.8  | 993             | 17.1 | 1364  | 14.2 |
| <b>100</b>                   | 3018             | 80.0 | 3777            | 64.9 | 6795  | 70.8 |

Table S6: Distribution of the household adherence score

| Household adherence score (%) | Infected persons |      | Contact persons |      | Total |      |
|-------------------------------|------------------|------|-----------------|------|-------|------|
|                               | N                | %    | N               | %    | N     | %    |
| <b>0</b>                      | 25               | 2.1  | 42              | 2.3  | 67    | 2.2  |
| <b>&gt;0-20</b>               | 52               | 4.3  | 105             | 5.8  | 157   | 5.2  |
| <b>&gt;20-40</b>              | 119              | 9.9  | 253             | 13.9 | 372   | 12.4 |
| <b>&gt;40-60</b>              | 191              | 16.0 | 373             | 20.6 | 564   | 18.7 |
| <b>&gt;60-80</b>              | 259              | 21.6 | 419             | 23.1 | 678   | 22.5 |
| <b>&gt;80-&lt;100</b>         | 278              | 23.2 | 348             | 19.2 | 626   | 20.8 |
| <b>100</b>                    | 273              | 22.8 | 274             | 15.1 | 547   | 18.2 |

Table S7: Factors influencing the baseline and household adherence score. Baseline models of linear backward regression analyses \*(disagree=1; agree=2)

| Baseline models                                                                                           | Non-Standardised Coefficients |            | Standardised Coefficients |       | 95% Confidence Interval |             |
|-----------------------------------------------------------------------------------------------------------|-------------------------------|------------|---------------------------|-------|-------------------------|-------------|
|                                                                                                           | Regression Coefficient (B)    | Std. Error | Beta                      | Sig.  | Lower Limit             | Upper Limit |
| <b>Baseline adherence score</b>                                                                           |                               |            |                           |       |                         |             |
| Infected persons (1) vs. Contact persons (2)                                                              | -0.030                        | 0.003      | -0.102                    | <.001 | -0.037                  | -0.024      |
| Age (years)                                                                                               | 0.001                         | 0.000      | 0.055                     | <.001 | <0.001                  | 0.001       |
| Gender (female=1; male=2)                                                                                 | -0.001                        | 0.003      | -0.002                    | .860  | -0.007                  | 0.006       |
| Migration background (no= 1; yes=2)                                                                       | 0.012                         | 0.008      | 0.017                     | .133  | -0.004                  | 0.027       |
| Socioeconomic status (SES) (high=1; middle and low=2)                                                     | -0.007                        | 0.004      | -0.018                    | .116  | -0.016                  | 0.002       |
| Comorbidity (yes=1; no=2)                                                                                 | 0.002                         | 0.004      | 0.004                     | .708  | -0.007                  | 0.010       |
| Married/ living in a Relationship (no=1; yes=2)                                                           | -0.001                        | 0.004      | -0.003                    | .791  | -0.009                  | 0.007       |
| Having Children (yes=1; no=2)                                                                             | -0.010                        | 0.004      | -0.033                    | .023  | -0.018                  | -0.001      |
| Access to balcony or garden (yes=0; no=1)                                                                 | -0.002                        | 0.005      | -0.006                    | .640  | -0.012                  | 0.007       |
| I think the coronavirus is dangerous. *                                                                   | 0.011                         | 0.008      | 0.017                     | .175  | -0.005                  | 0.027       |
| I have been given clear information about the reason for the isolation/quarantine. *                      | 0.007                         | 0.006      | 0.017                     | .244  | -0.005                  | 0.018       |
| It was explained to me in an understandable way how to behave in quarantine. *                            | 0.047                         | 0.006      | 0.125                     | <.001 | 0.036                   | 0.058       |
| I think the isolation/ quarantine measures are too strict. *                                              | -0.016                        | 0.004      | -0.048                    | <.001 | -0.024                  | -0.008      |
| I think the isolation/ quarantine measures are too lax. *                                                 | -0.012                        | 0.004      | -0.037                    | .002  | -0.020                  | -0.005      |
| When I isolate/quarantine myself, I am protecting myself. *                                               | 0.004                         | 0.004      | 0.013                     | .268  | -0.003                  | 0.011       |
| When I isolate/ quarantine myself, I am protecting other members of my household. *                       | 0.012                         | 0.004      | 0.038                     | .002  | 0.005                   | 0.020       |
| When I isolate/ quarantine myself, I am protecting our society from a further spread of the coronavirus.* | 0.044                         | 0.013      | 0.041                     | .001  | 0.019                   | 0.070       |
| People in my professional and social environment have expected me to implement the quarantine measures. * | 0.037                         | 0.006      | 0.070                     | <.001 | 0.025                   | 0.049       |
| I experienced difficulties in obtaining everyday necessities during isolation/quarantine *                | -0.015                        | 0.004      | -0.044                    | <.001 | -0.023                  | -0.007      |
| I suffered financial losses due to the isolation/quarantine (yes=1; no=2)                                 | -0.005                        | 0.004      | -0.012                    | .294  | -0.013                  | 0.004       |
| <b>Household adherence score</b>                                                                          |                               |            |                           |       |                         |             |
| Infected persons (1) vs. Contact persons (2)                                                              | -0.052                        | 0.010      | -0.102                    | <.001 | -0.072                  | -0.032      |
| Age (years)                                                                                               | 0.002                         | 0.001      | 0.104                     | <.001 | 0.001                   | 0.003       |
| Sex (female=1; male=2)                                                                                    | 0.023                         | 0.010      | 0.046                     | .023  | 0.003                   | 0.043       |
| Migration background (no= 1; yes=2)                                                                       | 0.067                         | 0.022      | 0.060                     | .003  | 0.023                   | 0.110       |

1  
2  
3  
4  
5  
6  
7  
8  
9  
10  
11  
12  
13  
14  
15  
16  
17  
18  
19  
20  
21  
22  
23  
24  
25  
26  
27  
28  
29  
30  
31  
32  
33  
34  
35  
36  
37  
38  
39  
40  
41  
42  
43  
44  
45  
46

|                                                                                                           |        |       |        |       |        |        |
|-----------------------------------------------------------------------------------------------------------|--------|-------|--------|-------|--------|--------|
| Socioeconomic status (SES) (high=1; middle and low=2)                                                     | -0.028 | 0.012 | -0.045 | .024  | -0.053 | -0.004 |
| Comorbidity (yes=1; no=2)                                                                                 | -0.006 | 0.012 | -0.010 | .608  | -0.030 | 0.018  |
| Married/ living in a Relationship (no=1; yes=2)                                                           | 0.064  | 0.014 | 0.101  | <.001 | 0.036  | 0.091  |
| Having Children (yes=1; no=2)                                                                             | -0.029 | 0.013 | -0.058 | .029  | -0.054 | -0.003 |
| Access to balcony or garden (yes=0; no=1)                                                                 | -0.015 | 0.017 | -0.017 | .391  | -0.048 | 0.019  |
| I think the coronavirus is dangerous. *                                                                   | 0.055  | 0.023 | 0.049  | .019  | 0.009  | 0.101  |
| I have been given clear information about the reason for the isolation/quarantine. *                      | 0.040  | 0.017 | 0.057  | .019  | 0.007  | 0.074  |
| It was explained to me in an understandable way how to behave in quarantine. *                            | 0.032  | 0.016 | 0.048  | .047  | 0.000  | 0.064  |
| I think the isolation/ quarantine measures are too strict. *                                              | -0.015 | 0.012 | -0.026 | .201  | -0.038 | 0.008  |
| I think the isolation/ quarantine measures are too lax. *                                                 | -0.012 | 0.011 | -0.022 | .276  | -0.035 | 0.010  |
| When I isolate/quarantine myself, I am protecting myself. *                                               | 0.008  | 0.010 | 0.015  | .455  | -0.012 | 0.028  |
| When I isolate/ quarantine myself, I am protecting other members of my household. *                       | 0.142  | 0.013 | 0.236  | <.001 | 0.117  | 0.167  |
| When I isolate/ quarantine myself, I am protecting our society from a further spread of the coronavirus.* | 0.069  | 0.042 | 0.034  | .099  | -0.013 | 0.150  |
| People in my professional and social environment have expected me to implement the quarantine measures. * | 0.007  | 0.019 | 0.007  | .729  | -0.031 | 0.045  |
| I experienced difficulties in obtaining everyday necessities during isolation/quarantine *                | -0.004 | 0.012 | -0.006 | .766  | -0.028 | 0.021  |
| I suffered financial losses due to the isolation/quarantine (yes=1; no=2)                                 | -0.025 | 0.013 | -0.040 | .049  | -0.049 | <0.001 |

STROBE Statement—Checklist of items that should be included in reports of *cross-sectional studies*

|                              | Item No | Recommendation                                                                                                                                                                                    | Page No           |
|------------------------------|---------|---------------------------------------------------------------------------------------------------------------------------------------------------------------------------------------------------|-------------------|
| <b>Title and abstract</b>    | 1       | (a) Indicate the study's design with a commonly used term in the title or the abstract                                                                                                            | 2                 |
|                              |         | (b) Provide in the abstract an informative and balanced summary of what was done and what was found                                                                                               | 2                 |
| <b>Introduction</b>          |         |                                                                                                                                                                                                   |                   |
| Background/rationale         | 2       | Explain the scientific background and rationale for the investigation being reported                                                                                                              | 3-4               |
| Objectives                   | 3       | State specific objectives, including any prespecified hypotheses                                                                                                                                  | 3-4               |
| <b>Methods</b>               |         |                                                                                                                                                                                                   |                   |
| Study design                 | 4       | Present key elements of study design early in the paper                                                                                                                                           | 4-5               |
| Setting                      | 5       | Describe the setting, locations, and relevant dates, including periods of recruitment, exposure, follow-up, and data collection                                                                   | 4-5               |
| Participants                 | 6       | (a) Give the eligibility criteria, and the sources and methods of selection of participants                                                                                                       | 4-5               |
| Variables                    | 7       | Clearly define all outcomes, exposures, predictors, potential confounders, and effect modifiers. Give diagnostic criteria, if applicable                                                          | 4-7               |
| Data sources/<br>measurement | 8*      | For each variable of interest, give sources of data and details of methods of assessment (measurement). Describe comparability of assessment methods if there is more than one group              | 4-7               |
| Bias                         | 9       | Describe any efforts to address potential sources of bias                                                                                                                                         | 4-7               |
| Study size                   | 10      | Explain how the study size was arrived at                                                                                                                                                         | 5 (Fig. 1)        |
| Quantitative variables       | 11      | Explain how quantitative variables were handled in the analyses. If applicable, describe which groupings were chosen and why                                                                      | 4-7               |
| Statistical methods          | 12      | (a) Describe all statistical methods, including those used to control for confounding                                                                                                             | 7                 |
|                              |         | (b) Describe any methods used to examine subgroups and interactions                                                                                                                               | 7                 |
|                              |         | (c) Explain how missing data were addressed                                                                                                                                                       | 7                 |
|                              |         | (d) If applicable, describe analytical methods taking account of sampling strategy                                                                                                                | 7                 |
|                              |         | (e) Describe any sensitivity analyses                                                                                                                                                             | 7                 |
| <b>Results</b>               |         |                                                                                                                                                                                                   |                   |
| Participants                 | 13*     | (a) Report numbers of individuals at each stage of study—eg numbers potentially eligible, examined for eligibility, confirmed eligible, included in the study, completing follow-up, and analysed | 5 (Fig. 1)        |
|                              |         | (b) Give reasons for non-participation at each stage                                                                                                                                              | 5 (Fig. 1)        |
|                              |         | (c) Consider use of a flow diagram                                                                                                                                                                | Fig. 1            |
| Descriptive data             | 14*     | (a) Give characteristics of study participants (eg demographic, clinical, social) and information on exposures and potential confounders                                                          | 8 (Tab. 2)        |
|                              |         | (b) Indicate number of participants with missing data for each variable of interest                                                                                                               | 8, Fig. 1, Tab. 2 |
| Outcome data                 | 15*     | Report numbers of outcome events or summary measures                                                                                                                                              | 8-12              |



|    |                          |    |                                                                                                                                                                                                              |
|----|--------------------------|----|--------------------------------------------------------------------------------------------------------------------------------------------------------------------------------------------------------------|
| 1  |                          |    |                                                                                                                                                                                                              |
| 2  | Main results             | 16 | (a) Give unadjusted estimates and, if applicable, confounder-adjusted estimates and their precision (eg, 95% confidence interval). Make clear which confounders were adjusted for and why they were included |
| 3  |                          |    |                                                                                                                                                                                                              |
| 4  |                          |    |                                                                                                                                                                                                              |
| 5  |                          |    |                                                                                                                                                                                                              |
| 6  |                          |    |                                                                                                                                                                                                              |
| 7  |                          |    | (b) Report category boundaries when continuous variables were categorized                                                                                                                                    |
| 8  |                          |    |                                                                                                                                                                                                              |
| 9  |                          |    |                                                                                                                                                                                                              |
| 10 |                          |    | (c) If relevant, consider translating estimates of relative risk into absolute risk for a meaningful time period                                                                                             |
| 11 |                          |    |                                                                                                                                                                                                              |
| 12 | Other analyses           | 17 | Report other analyses done—eg analyses of subgroups and interactions, and sensitivity analyses                                                                                                               |
| 13 |                          |    |                                                                                                                                                                                                              |
| 14 |                          |    |                                                                                                                                                                                                              |
| 15 | <b>Discussion</b>        |    |                                                                                                                                                                                                              |
| 16 | Key results              | 18 | Summarise key results with reference to study objectives                                                                                                                                                     |
| 17 | Limitations              | 19 | Discuss limitations of the study, taking into account sources of potential bias or imprecision. Discuss both direction and magnitude of any potential bias                                                   |
| 18 |                          |    |                                                                                                                                                                                                              |
| 19 |                          |    |                                                                                                                                                                                                              |
| 20 |                          |    |                                                                                                                                                                                                              |
| 21 | Interpretation           | 20 | Give a cautious overall interpretation of results considering objectives, limitations, multiplicity of analyses, results from similar studies, and other relevant evidence                                   |
| 22 |                          |    |                                                                                                                                                                                                              |
| 23 |                          |    |                                                                                                                                                                                                              |
| 24 |                          |    |                                                                                                                                                                                                              |
| 25 | Generalisability         | 21 | Discuss the generalisability (external validity) of the study results                                                                                                                                        |
| 26 |                          |    |                                                                                                                                                                                                              |
| 27 | <b>Other information</b> |    |                                                                                                                                                                                                              |
| 28 | Funding                  | 22 | Give the source of funding and the role of the funders for the present study and, if applicable, for the original study on which the present article is based                                                |
| 29 |                          |    |                                                                                                                                                                                                              |
| 30 |                          |    |                                                                                                                                                                                                              |
| 31 |                          |    |                                                                                                                                                                                                              |
| 32 |                          |    |                                                                                                                                                                                                              |

\*Give information separately for exposed and unexposed groups.

**Note:** An Explanation and Elaboration article discusses each checklist item and gives methodological background and published examples of transparent reporting. The STROBE checklist is best used in conjunction with this article (freely available on the Web sites of PLoS Medicine at <http://www.plosmedicine.org/>, Annals of Internal Medicine at <http://www.annals.org/>, and Epidemiology at <http://www.epidem.com/>). Information on the STROBE Initiative is available at [www.strobe-statement.org](http://www.strobe-statement.org).

# BMJ Open

## Adherence to stay-at-home orders: Awareness, implementation and difficulties of officially ordered quarantine measures in the context of the COVID-19 pandemic in Cologne – A retrospective cohort study

|                                 |                                                                                                                                                                                                                                                                                                                                                                                                                                                                                                                                                                                                                                                                                                                                                                                                                                                                                                                                                                                                                                                                                                                                                                         |
|---------------------------------|-------------------------------------------------------------------------------------------------------------------------------------------------------------------------------------------------------------------------------------------------------------------------------------------------------------------------------------------------------------------------------------------------------------------------------------------------------------------------------------------------------------------------------------------------------------------------------------------------------------------------------------------------------------------------------------------------------------------------------------------------------------------------------------------------------------------------------------------------------------------------------------------------------------------------------------------------------------------------------------------------------------------------------------------------------------------------------------------------------------------------------------------------------------------------|
| Journal:                        | <i>BMJ Open</i>                                                                                                                                                                                                                                                                                                                                                                                                                                                                                                                                                                                                                                                                                                                                                                                                                                                                                                                                                                                                                                                                                                                                                         |
| Manuscript ID                   | bmjopen-2022-063358.R1                                                                                                                                                                                                                                                                                                                                                                                                                                                                                                                                                                                                                                                                                                                                                                                                                                                                                                                                                                                                                                                                                                                                                  |
| Article Type:                   | Original research                                                                                                                                                                                                                                                                                                                                                                                                                                                                                                                                                                                                                                                                                                                                                                                                                                                                                                                                                                                                                                                                                                                                                       |
| Date Submitted by the Author:   | 19-Sep-2022                                                                                                                                                                                                                                                                                                                                                                                                                                                                                                                                                                                                                                                                                                                                                                                                                                                                                                                                                                                                                                                                                                                                                             |
| Complete List of Authors:       | Book, Julian; Cologne Health Authority, Department of Infection Control and Environmental Hygiene; RWTH Aachen University Medical Faculty, Institute for Occupational, Social and Environmental Medicine<br>Broichhaus, Lukas; Cologne Health Authority, Department of Infection Control and Environmental Hygiene; RWTH Aachen University Medical Faculty, Institute for Occupational, Social and Environmental Medicine<br>Grüne, Barbara; Cologne Health Authority, Department of Infection Control and Environmental Hygiene<br>Nießen, Johannes; Cologne Health Authority<br>Wiesmüller, Gerhard A.; Cologne Health Authority, Department of Infection Control and Environmental Hygiene; RWTH Aachen University Medical Faculty, Institute for Occupational, Social and Environmental Medicine<br>Joisten, Christine; Institute of Movement and Neurosciences, Department for physical activity in public health; Cologne Health Authority, Department of Infection Control and Environmental Hygiene<br>Kossow, Annelene; Cologne Health Authority, Department of Infection Control and Environmental Hygiene; University Hospital Munster, Institute of Hygiene |
| <b>Primary Subject Heading</b>: | Public health                                                                                                                                                                                                                                                                                                                                                                                                                                                                                                                                                                                                                                                                                                                                                                                                                                                                                                                                                                                                                                                                                                                                                           |
| Secondary Subject Heading:      | Infectious diseases                                                                                                                                                                                                                                                                                                                                                                                                                                                                                                                                                                                                                                                                                                                                                                                                                                                                                                                                                                                                                                                                                                                                                     |
| Keywords:                       | COVID-19, EPIDEMIOLOGY, Infection control < INFECTIOUS DISEASES, PUBLIC HEALTH                                                                                                                                                                                                                                                                                                                                                                                                                                                                                                                                                                                                                                                                                                                                                                                                                                                                                                                                                                                                                                                                                          |
|                                 |                                                                                                                                                                                                                                                                                                                                                                                                                                                                                                                                                                                                                                                                                                                                                                                                                                                                                                                                                                                                                                                                                                                                                                         |

SCHOLARONE™  
Manuscripts



I, the Submitting Author has the right to grant and does grant on behalf of all authors of the Work (as defined in the below author licence), an exclusive licence and/or a non-exclusive licence for contributions from authors who are: i) UK Crown employees; ii) where BMJ has agreed a CC-BY licence shall apply, and/or iii) in accordance with the terms applicable for US Federal Government officers or employees acting as part of their official duties; on a worldwide, perpetual, irrevocable, royalty-free basis to BMJ Publishing Group Ltd ("BMJ") its licensees and where the relevant Journal is co-owned by BMJ to the co-owners of the Journal, to publish the Work in this journal and any other BMJ products and to exploit all rights, as set out in our [licence](#).

The Submitting Author accepts and understands that any supply made under these terms is made by BMJ to the Submitting Author unless you are acting as an employee on behalf of your employer or a postgraduate student of an affiliated institution which is paying any applicable article publishing charge ("APC") for Open Access articles. Where the Submitting Author wishes to make the Work available on an Open Access basis (and intends to pay the relevant APC), the terms of reuse of such Open Access shall be governed by a Creative Commons licence – details of these licences and which [Creative Commons](#) licence will apply to this Work are set out in our licence referred to above.

Other than as permitted in any relevant BMJ Author's Self Archiving Policies, I confirm this Work has not been accepted for publication elsewhere, is not being considered for publication elsewhere and does not duplicate material already published. I confirm all authors consent to publication of this Work and authorise the granting of this licence.

1  
2  
3  
4 **Adherence to stay-at-home orders: Awareness, implementation and difficulties of officially**  
5 **ordered quarantine measures in the context of the COVID-19 pandemic in Cologne – A**  
6 **retrospective cohort study**  
7  
8

9 **Authors:** Julian Book<sup>1,2</sup>, Lukas Broichhaus<sup>1,2</sup>, Barbara Grüne MD<sup>1</sup>, Johannes Nießen MD<sup>3</sup>, Prof.  
10 Gerhard A Wiesmüller MD<sup>1,2</sup>, Prof. Christine Joisten MD, PhD<sup>1,4,\*</sup>, Annelene Kossow MD,  
11 PhD<sup>1,5,\*</sup>  
12

13 **Author affiliations:**

14 1 Department of Infection Control and Environmental Hygiene, Cologne Health  
15 Authority, Cologne, Germany

16 2 Institute for Occupational, Social and Environmental Medicine, Uniclinic RWTH Aachen,  
17 Aachen, Germany

18 3 Cologne Health Authority, Cologne, Germany

19 4 Department for Physical Activity in Public Health, German Sport University Institute  
20 of Movement and Neurosciences, Cologne, Germany

21 5 Institute of Hygiene, University Hospital Muenster, Muenster, Germany

22 \* contributed equally  
23  
24  
25  
26

27 **Corresponding Author:**

28 Julian Book

29 Gleueler Str. 163, 50931 Cologne, Germany

30 E-Mail: julian.book@gmx.de  
31  
32

33 **Word count:** 5570 words  
34  
35

36 **Keywords (MeSH-Terms):**

37 Public Health, Infectious Disease Medicine, COVID-19, Quarantine, Guideline Adherence,  
38 Patient Isolation  
39  
40  
41  
42  
43  
44  
45  
46  
47  
48  
49  
50  
51  
52  
53  
54  
55  
56  
57  
58  
59  
60

## ABSTRACT

### Objectives:

To estimate the awareness, implementation and difficulty of behavioural recommendations and their correlates in officially ordered domestic isolation and quarantine during the COVID-19 pandemic.

### Design:

Online retrospective cohort survey conducted from 12 December 2020 to 6 January 2021 as part of the Cologne-Corona Counselling and Support for Index and Contact Persons During the Quarantine Period study (CoCo-Fakt).

### Setting:

Administrative area of the city of Cologne, Germany.

### Participants:

3011 infected persons and 5822 contacts over 16 years of age who were in officially ordered domestic isolation or quarantine between 28 February 2020 and 09 December 2020. Of these, 60.4% were women.

### Outcome measures:

Self-developed scores were calculated, based on responses about awareness and implementation of 19 behavioural recommendations, to determine community- and household-based adherence. Linear regression analyses were conducted to determine factors influencing adherence.

### Results:

The average adherence to all recommendations, including staying in a single room, keeping distance and wearing a mask, was  $13.8 \pm 2.4$  out of 15 points for community-based recommendations (CBRs) and  $17.2 \pm 6.8$  out of 25 points for household-based recommendations (HBRs). Infected persons were significantly more adherent to CBRs ( $14.3 \pm 2.0$  vs.  $13.7 \pm 2.6$  points;  $p < .001$ ) and HBRs ( $18.2 \pm 6.7$  vs.  $16.5 \pm 6.8$  points;  $p < .001$ ) than were contact persons. Among other factors, both status as an infected person and being informed about the measures positively influenced participants' adherence. The linear regression analysis explained 6.6% and 14.4% (corr.  $R^2$ ) of the adherence to HBRs and CBRs.

### Conclusion

Not all persons under official quarantine were aware of the relevant behavioural recommendations. This was especially true in cases where instructions were given for measures to be taken in one's own household. Due to the high transmission rates within households, HBRs should be communicated with particular emphasis.

### STRENGTHS AND LIMITATIONS OF THIS STUDY

- A large, homogenous cohort of participants in officially ordered isolation and quarantine, a subgroup for which studies on adherence are lacking.
- Detailed consideration of the various recommendations for domestic isolation and quarantine, taking motivation into account.
- Limitation to the catchment area of the Cologne Health Department, Germany.

- Selection bias due to the online format of the survey.
- Non-compliance with officially ordered isolation and quarantine measures is a punishable offence in Germany. Even though the anonymity of participants was explicitly mentioned in our survey, it cannot be ruled out that this led to desired, less honest answers.

## INTRODUCTION

Alongside vaccination, public health interventions such as restrictions on public life, social distancing and, in particular, the isolation of people infected with COVID-19 (infected persons [IPs]) and the quarantine of their close contacts (contact persons [CPs]) continue to constitute a central pillar of COVID-19 control in many countries.[1] Therefore, there have been severe penalties if officially ordered quarantine and isolation measures are not followed. In Germany at the time of the survey, punishment betrayed an income-related fine of over 20,000€ or a prison sentence of up to 5 years, which was relatively high by international comparison. In other countries such as Japan or Sweden, no penalties were threatened in cases of disregarding isolation and quarantine recommendations.[2]

Analyses of adherence to social distancing measures during the COVID-19 pandemic, however, have yielded findings ranging from 87% adherence[3] to 92.8% non-adherence[4] due to different questionnaire items and assessment criteria. Despite this heterogeneity, it has generally been shown that women, older people, those with higher levels of education or socioeconomic status (SES) and people with no dependent children were more likely to implement the interventions than were men, younger people or those with lower levels of education or SES.[3–8] In addition to financial–existential problems such as lost income or social obligations to others and cultural–religious issues such as restrictions on religious practice, psychological factors such as depression and anxiety also seem to have had a negative influence on adherence to COVID-19 protection measures (Solomou et al.[9], Wang et al.[10], Al-Sabbagh et al.[11]). Conversely, the COVID-19 pandemic and its associated countermeasures have had adverse effects on mental well-being, particularly on rates of depression and anxiety in the population (Kunzler et al.[12] and Rajkumar[13]).

The aforementioned studies mainly address general social distancing measures and self-isolation; adherence to officially ordered isolation and quarantine has been hardly investigated before now. A Norwegian cohort study identified almost 1900 people with positive COVID-19 tests from August to October 2020. Among them, only 79% of men and 91% of women adhered to isolation.[14] In a UK cohort study that included 1213 people with COVID-19-suspected symptoms, only 42.5% reported not leaving the house in the 10 days after symptom onset. Verberk et al. also examined households' levels of implementing recommendations in a small study of 34 households, each with an index case. While in most households, staying in the same room with the IP was avoided and ventilation increased, wearing masks in the household was often not considered useful and was rarely implemented.[15]

Although COVID-19 vaccination significantly reduces infection rates and the infectivity of those affected, isolation and quarantine measures continue to be highly valued responses to the pandemic in the context of emerging variants of concern and reduced vaccine efficacy against these variants.[16, 17] It is therefore essential to understand the general level of awareness and implementation of various measures and of possible factors influencing

1  
2  
3 awareness and implementation, especially among persons at risk of transmission, such as IPs,  
4 or at risk of disease, such as CPs.

5 Therefore, within the Cologne-Corona Counselling and Support for Index and Contact Persons  
6 During the Quarantine Period (CoCo-Fakt) cohort study [18], IPs and CPs in the area of  
7 responsibility of the Cologne Health Department, the largest health department in Germany  
8 [17], were retrospectively and anonymously surveyed regarding their adherence to  
9 quarantine measures following an officially ordered domestic quarantine. Based on Tong et  
10 al.[19], the study recorded components of the Health Belief Model, in addition to socio-  
11 demographic factors such as age, gender, living or relationship situation and level of  
12 education. This model is intended to capture people's intentions to take or refrain from taking  
13 health measures.[20] These include the main constructs Perceived Benefits, Perceived  
14 Barriers, Expected Results, Psychological Characteristics/Peer Group Pressure, and Cues to  
15 Action/Health Knowledge.[21] The additional analysis of these variables in the context of  
16 quarantine adherence should help to develop effective measures.  
17  
18  
19  
20

## 21 METHODS

### 22 Study design

23  
24 Beginning in February 2020, trained staff from the Cologne Health Authority contacted IPs and  
25 CPs by telephone and questioned them in a standardised interview regarding their symptoms,  
26 possible routes of infection, chronic diseases, risk factors and residential and family  
27 situations.[17] These individuals had been quarantined based on the legal regulations for  
28 combating infectious diseases according to the Infectious Diseases Protection Act (in German,  
29 *Infektionsschutzgesetz*, or IfSG), with the usual length of quarantine for IPs being 14 days after  
30 symptom onset or a positive test result. The quarantine period for CPs was 10–14 days at the  
31 time of this survey, depending on the time of last contact. Until October 2020, this period  
32 could be extended, lasting several weeks for families that could not be physically separated.  
33 All data were recorded using the Cologne Health Authority's specially programmed software,  
34 the digital contact management system DiKoMa.[22]  
35  
36  
37  
38  
39  
40

41 The CoCo-Fakt study integrated all IPs and their relevant CPs, who had been quarantined by  
42 Cologne's local health authorities since the beginning of the COVID-19 pandemic in February  
43 2020. Therefore, from 28 February (the date of the first COVID-19 case in Cologne) to 9  
44 December 2020, all persons who were at least 16 years old, registered in DiKoMa with a  
45 positive SARS-CoV-2 test (by quantitative real-time polymerase chain reaction) and whose  
46 written informed consent was obtained were integrated into this analysis along with their  
47 relevant CPs.  
48  
49

50 The demographic factors of this survey were based on a modified version of the COVID-19  
51 Snapshot Monitoring questionnaire from the University of Erfurt (COSMO).[23] In addition,  
52 items on awareness and implementation of the behavioural recommendations were derived  
53 from the official recommendations provided by the World Health Organization (WHO), the  
54 European Centre for Disease Prevention and Control, the Robert Koch Institute (RKI) and the  
55 German Society for General and Family Medicine.[24–27]  
56  
57  
58

59 To prevent participants from providing untruthful information in the questionnaire, for fear  
60 of prosecution upon admitting incompliant behaviour, participants were explicitly informed



1  
2  
3 in the written clarification that the answers would be evaluated anonymously and could not  
4 be assigned to specific persons.  
5

6  
7 The questionnaire was carried out by the online survey software Unipark. Ethics approval was  
8 obtained from the Rheinisch–Westfälische Technische Hochschule Aachen Human Ethics  
9 Research Committee (351/20). Responding to the questionnaire took participants  
10 approximately 30 minutes, and qualitative data were evaluated using MAXQDA software. The  
11 survey was conducted from 12.12.2020 to 6.1.2021.  
12

13  
14 The detailed study design, including the complete questionnaire, was published in advance as  
15 a study protocol.[18]  
16

### 17 **Patient and public involvement**

18 The research questions and methods were developed based on the literature available at the  
19 time of the study's development in summer 2020. Affected persons from the researchers'  
20 personal environment were first approached and asked to respond to and assess the draft in  
21 order to optimise the survey and align it with the research questions. From this collective, 20  
22 additional affected persons were recruited by snowball sampling, and the survey's feasibility  
23 and duration were tested during June and July 2020. The draft questionnaire was adapted and  
24 finalised based on feedback from these respondents. Since the online survey was anonymised,  
25 no individual results were given to the patients (see Joisten et al. 2021[18]).  
26  
27  
28  
29

### 30 **Sampling and study population**

31 36498 persons whose email addresses were known were identified in DiKoMa during the  
32 period under consideration. Of these, 33699 persons were sent the questionnaire, and 13057  
33 clicked on the questionnaire. The study excluded pregnant women who were monitored and  
34 advised particularly intensively by the Cologne Health Department during the study period,  
35 persons under 16 years of age, subjects with missing or invalid essential information (sex, age,  
36 awareness of quarantine recommendations 1–3) and subjects who could not be assigned to  
37 the IP or CP groups (e.g. travel returnees) ( $N=3462$ ). Contacts who tested positive for SARS-  
38 CoV-19 during quarantine were included in the infected group. Thus, 9595 subjects (3773 IPs  
39 and 5822 CPs) were included in the analysis of adherence to community-based  
40 recommendations (CBRs). Household-based recommendations (HBRs) were relevant only for  
41 those individuals who needed to isolate themselves from others within a household.  
42 Therefore, individuals for whom this did not apply, such as those living alone or in cohort  
43 isolation, were not included in the analysis of household-based adherence ( $N=5584$ ). A total  
44 of 3011 subjects (1197 IPs, 1814 CPs) were included in the analysis of household-based  
45 adherence (Fig. 1).  
46  
47  
48  
49

### 50 **Demographic parameters and personal living situations**

51 Based on the COSMO survey, age, gender, migration background (yes/no), relationship status  
52 (single/partnered), chronic illnesses (yes/no), children (yes/no) and their number, lived alone  
53 (yes/no) and access to a garden or balcony (yes/no) were assessed. SES was determined based  
54 on the classifications of the German Health Update 2009.[28]  
55  
56  
57  
58

### 59 **Quarantine recommendations: Awareness, implementation and difficulties**



Recommendations on behaviour in isolation and quarantine from the WHO, the European Centre for Disease Prevention and Control, the RKI and the German Society for General and Family Medicine were reviewed.[24–27] As a synopsis of all these recommendations, a list with a total of 19 relevant isolation and quarantine recommendations was compiled by the authors (Table 1).

*Table 1: Behavioural recommendations in domestic quarantine and isolation. The evaluations of recommendations 1–4, 7, 8, 14 and 16 (bold), which the authors consider particularly relevant, are addressed in the paper and included in the calculation. CBR: Community-based recommendation; HBR: Household-based recommendation*

| No.       | Recommendation                                                                                                              |          |
|-----------|-----------------------------------------------------------------------------------------------------------------------------|----------|
| <b>1</b>  | <b>Do not leave your home.</b>                                                                                              | <b>C</b> |
| <b>2</b>  | <b>Do not receive visitors.</b>                                                                                             | <b>B</b> |
| <b>3</b>  | <b>Avoid personal contact with postal and delivery workers and have deliveries left outside the house or flat entrance.</b> | <b>R</b> |
| <b>4</b>  | <b>Stay apart from other household members in a single room.</b>                                                            | <b>H</b> |
| 5         | Sleep separately from other household members in a single room.                                                             | <b>B</b> |
| 6         | Have contact with other household members only when you need their help.                                                    | <b>R</b> |
| <b>7</b>  | <b>Keep at least a 1.5m distance when in contact with other household members.</b>                                          |          |
| <b>8</b>  | <b>Wear a mouth–nose mask when in contact with other household members.</b>                                                 |          |
| 9         | Take your meals in a different room from other household members.                                                           |          |
| 10        | Use the bathroom, hallway, kitchen and other common areas only when absolutely necessary.                                   |          |
| 11        | Use only one toilet. The rest of the household members should not use this toilet.                                          |          |
| 12        | The bathroom you use should be cleaned at least once a day.                                                                 |          |
| 13        | Surfaces you frequently touch (bedside table, door handles, smartphone, work surfaces, etc.) should be cleaned once a day.  |          |
| <b>14</b> | <b>Air all rooms regularly.</b>                                                                                             |          |
| 15        | Sneeze into the crook of your elbow or a disposable handkerchief.                                                           |          |
| <b>16</b> | <b>Wash your hands regularly for at least 20 seconds, especially after blowing your nose or sneezing.</b>                   |          |
| 17        | Collect tissues, gloves and other rubbish in a lidded bin in your room.                                                     |          |
| 18        | After washing your hands, use paper towels or a towel that only you use, and change it daily.                               |          |
| 19        | Wash your clothes at a minimum of 60 degrees and separately from the laundry of other household members.                    |          |

Of these, three recommendations (do not receive visitors, stay at home and have no contact with delivery or postal workers) relate to seclusion from the public, are relevant for all persons in quarantine and were classified as CBRs. The other 16 recommendations relate to seclusion within a household and are relevant only to people who needed to isolate themselves from other household members but not to people living alone or to index people in cohort isolation; these were classified as HBRs. To identify subjects for whom HBRs were relevant, the item ‘Did you have to isolate yourself from other household members during your quarantine? (yes/no)’ was included in the questionnaire.

CBRs 1–3 were presented to all participants. The HBRs were presented only to subjects who indicated that they had had to isolate themselves from other household members. Recommendation 11 (use of a separate toilet) was also presented only to subjects who had previously reported living in a household with more than one toilet. For each recommendation presented, the respondents were first asked whether the respective recommendation was

1  
2  
3 known (yes=1, no=2). If the recommendation was known, they were also asked to what extent  
4 it had been implemented and how difficult it was to implement. The survey was carried out  
5 using a 6-part interval scale with endpoints: 1  $\triangleq$  I have not implemented at all, 6  $\triangleq$  I have fully  
6 implemented, 1  $\triangleq$  I have found this very difficult and 6  $\triangleq$  I have not found this difficult at all.  
7  
8

9 Whereas at the beginning of the COVID-19 pandemic, droplet and smear infection were  
10 considered the main transmission routes, inhalation of virus-containing particles in the form  
11 of aerosols has since been identified as the most important transmission route in the further  
12 course of the pandemic.[29] The present paper considers in more detail the CBRs on staying  
13 in a single room, having regular ventilation, wearing a mouth–nose covering, keeping a  
14 distance of 1.5 m from other persons and practising hand hygiene, which are considered  
15 particularly relevant for the prevention of aerosol transmission and have been promoted in  
16 an extensive public campaign by the German Federal Ministry of Health.[30] To enable  
17 comparability of adherence in our study population with other cohorts, we recorded  
18 behaviour in isolation and quarantine for these 19 recommendations in the finest detail  
19 possible. Definitions of adherence that, for example, only consider not leaving home[31, 32]  
20 or only selected WHO recommendations[31] could thus also be recreated from our dataset.  
21 Evaluations of other recommendations can be found in the supplement (Table S1, Table S2,  
22 Table S3).  
23  
24  
25  
26  
27

### 28 **Adherence scores**

#### 29 **Baseline adherence score**

30 A self-developed baseline adherence score was calculated to map individual adherence and  
31 examine influencing factors. The basis for this baseline adherence score was the awareness  
32 and implementation of the particularly important CBRs 1–3.  
33  
34

35 According to the answers on the 6-part scale for the implementation of the recommendations,  
36 each respondent received points from 0 (not implemented at all) to 5 (fully implemented) for  
37 each of the three recommendations. If the respondent was unaware of the recommendation  
38 or did not provide information on implementation, 0 points were awarded. With three  
39 recommendations scored, the maximum possible score was 15, corresponding to a baseline  
40 adherence score of 100%.  
41  
42

#### 43 **Household adherence score**

44 Following the same procedure, a self-developed household adherence score was calculated,  
45 including HBRs 4, 7, 8, 14 and 16 for all subjects who had to isolate themselves from other  
46 household members. Missing answers, as well as the answer 'I did not implement at all', were  
47 weighted with 0 points. With five recommendations scored, the maximum possible score was  
48 25, corresponding to a household adherence score of 100%.  
49  
50

### 51 **Items of the Health Belief Model**

52 To capture in detail the factors influencing health-related behaviour under the Health Belief  
53 Model (Perceived Severity, Perceived Susceptibility, Perceived Benefits, Perceived Barriers,  
54 Expected Result, Psychological Characteristics/Peer Group Pressure and Cues to Action/Health  
55 Knowledge), we developed 11 statements or questions with hypothetical influence on  
56 adherence, with isolation and quarantine measures based on Tong et al. and Al-Sabbagh et al.  
57 rose [11, 19, 20]:  
58  
59  
60

- 1
- 2
- 3
- 4 - Perceived Severity/Perceived Susceptibility
- 5     ○ 'I think the coronavirus is dangerous.'
- 6
- 7 - Perceived Benefits
- 8     ○ 'When I isolate/quarantine myself, I am protecting myself.'
- 9     ○ 'When I isolate/quarantine myself, I am protecting other members of my
- 10     household.'
- 11     ○ 'When I isolate/quarantine myself, I am protecting our society from the further
- 12     spread of the coronavirus.'
- 13
- 14 - Perceived Barriers
- 15     ○ 'I experienced difficulties in obtaining everyday necessities during
- 16     isolation/quarantine.'
- 17     ○ 'I suffered financial losses due to the isolation/quarantine.'
- 18
- 19 - Expected Result
- 20     ○ 'I think the isolation/quarantine measures are too strict.'
- 21     ○ 'I think the quarantine measures are too lax.'
- 22
- 23 - Psychological characteristics/Peer group pressure
- 24     ○ 'People in my professional and social environment have expected me to
- 25     implement the quarantine measures.'
- 26
- 27 - Cues to Action/Health Knowledge
- 28     ○ 'I have been given clear information about the reason for the
- 29     isolation/quarantine.'
- 30     ○ 'It was explained to me in an understandable way how to behave in
- 31     isolation/quarantine.'
- 32
- 33
- 34

35 Respondents' agreement with each statement was determined using a 6-item endpoint-

36 named interval scale (strongly disagree–strongly agree). For the question regarding financial

37 losses due to quarantine, the answer was binary (yes/no) (Table S4).

38

### 39 **Data analysis**

40 Descriptive and inductive data analyses were conducted using the program SPSS 28.0 (IBM,

41 Armonk, NY, USA). Chi-squared tests and *t*-tests were conducted to assess the differences

42 between IPs and CPs.

43

44 Linear backward regression analyses were conducted to determine the influence of age (in

45 years), quarantine as an IP (1) or CP (2), gender (female=1, male=2), being in a partnership

46 (no=1, yes=2), living situation with balcony or garden (yes=0, no=1), migration background

47 (no=1, yes=2), SES (high=1, middle and low=2), comorbidity (yes=1, no=2), presence of

48 children in the household (yes=1, no=2), as well as the hypothetical factors influencing the

49 baseline and household adherence scores listed previously (Table S4) (agree=1, disagree=2).

50 Non-significant factors were excluded during stepwise regression. A *p*-value below 0.05 was

51 considered significant.

52

53

54

55

## 56 **RESULTS**

### 57 **Demographic parameters and personal life situation**

Among the study participants, 60.4% were women (see Table 2). The proportion of women among the contact persons was 63.0%, which was significantly higher than the proportion of women among the index persons at 56.5% ( $p < .001$ ). The participants in the study were, on average,  $40.9 \pm 14.2$  years old. Index participants were, on average,  $41.9 \pm 14.3$  years old, slightly older than contacts with an average age of  $40.3 \pm 14.1$  years ( $p < .001$ ). 5.4% of the study participants had a migration background; here, too, there was a significant difference between 7.2% of the index persons and 4.2% of the contact persons ( $p < .001$ ).

Table 2: General characteristics of participants, total and by status as infected person or contact person; \* chi-squared test; \*\*unpaired t-test

| Variable                                | Total<br>N (%) | Infected<br>persons<br>N (%) | Contact<br>persons<br>N (%) | p-Value |
|-----------------------------------------|----------------|------------------------------|-----------------------------|---------|
| <b>Sample</b>                           | 9595 (100)     | 3773 (39.3)                  | 5822 (60.7)                 |         |
| <b>Sex</b>                              | 9595 (100)     |                              |                             |         |
| Male                                    | 3797 (39.6)    | 1643 (43.5)                  | 2154 (37.0)                 | <.001*  |
| Female                                  | 5798 (60.4)    | 2130 (56.5)                  | 3668 (63.0)                 |         |
| <b>Mean age years (SD)</b>              | 40.9 (14.2)    | 41.9 (14.3)                  | 40.3 (14.1)                 | <.001** |
| <b>Age Groups (years)</b>               | 9595 (100)     |                              |                             |         |
| 16-29                                   | 2580 (26.9)    | 925 (24.5)                   | 1655 (28.4)                 | <.001*  |
| 30-39                                   | 2260 (23.6)    | 853 (22.6)                   | 1407 (24.2)                 |         |
| 40-49                                   | 1771 (18.5)    | 731 (19.4)                   | 1040 (17.9)                 |         |
| 50-59                                   | 1953 (20.4)    | 812 (21.5)                   | 1141 (19.6)                 |         |
| 60-69                                   | 789 (8.2)      | 339 (9.0)                    | 450 (7.7)                   |         |
| 70+                                     | 242 (2.5)      | 113 (3.0)                    | 129 (2.2)                   |         |
| <b>Migration background</b>             | 9427 (100)     |                              |                             |         |
| No                                      | 8919 (94.6)    | 3421 (92.8)                  | 5498 (95.8)                 | <.001*  |
| Yes                                     | 508 (5.4)      | 265 (7.2)                    | 243 (4.2)                   |         |
| <b>Socioeconomic status (SES)</b>       | 9522 (100)     |                              |                             |         |
| High                                    | 7644 (80.3)    | 2964 (79.2)                  | 4680 (80.9)                 | .007*   |
| Middle                                  | 1790 (18.8)    | 731 (19.5)                   | 1059 (18.3)                 |         |
| Low                                     | 88 (0.9)       | 47 (1.3)                     | 41 (0.7)                    |         |
| <b>Married/living in a relationship</b> | 9383 (100)     |                              |                             |         |
| No                                      | 2650 (28.2)    | 1012 (27.5)                  | 1638 (28.7)                 | .186*   |
| yes                                     | 6733 (71.8)    | 2671 (72.5)                  | 4062 (71.3)                 |         |
| <b>Having children</b>                  | 9553 (100)     |                              |                             |         |
| No                                      | 5419 (56.7)    | 2070 (55.2)                  | 3349 (57.7)                 | .013*   |
| Yes                                     | 4134 (43.3)    | 1683 (44.8)                  | 2451 (42.3)                 |         |
| <b>Living alone</b>                     | 9545 (100)     |                              |                             |         |
| No                                      | 6767 (70.9)    | 2656 (70.8)                  | 4111 (70.9)                 | .905*   |
| Yes                                     | 2778 (29.1)    | 1094 (29.2)                  | 1684 (29.1)                 |         |
| <b>Access to balcony or garden</b>      | 9557 (100)     |                              |                             |         |
| No                                      | 1443 (15.1)    | 530 (14.1)                   | 913 (15.7)                  | .030*   |
| Yes                                     | 8114 (84.9)    | 3226 (85.9)                  | 4888 (84.3)                 |         |
| <b>Comorbidity</b>                      | 9264 (100)     |                              |                             |         |
| No                                      | 7212 (77.8)    | 2768 (76.2)                  | 4444 (78.9)                 | .003*   |
| Yes                                     | 2052 (22.2)    | 863 (23.8)                   | 1189 (21.1)                 |         |

### Awareness of the recommendations

Results showed that 88.8% of all respondents, 92.2% of IPs and 86.6% of CPs were aware of all three CBRs (stay at home, do not receive visitors and have no contact with delivery or postal

workers). On average,  $2.9 \pm 0.3$  of the CBRs were known to the IPs, and  $2.8 \pm 0.4$  were known to the CPs ( $p < .001$ ). While 98.7% of respondents were aware of the recommendation not to receive visitors, and 98.3% were aware of the recommendation not to leave home, only 90.1% were aware of the recommendation not to have contact with delivery or postal workers. The awareness of the 16 HBRs varied more markedly. On average,  $10.7 \pm 4.0$  of the 16 HBRs were known to all subjects,  $11.2 \pm 3.8$  to the IPs and  $10.3 \pm 4.0$  to the CPs ( $p < .001$ ). For example, only 33.2% of respondents were aware of the recommendation to wash laundry separately and at  $60^\circ\text{C}$ , and only 41.1% knew about the recommendation to dispose of waste in a separate waste bin. On the other hand, 97.7% and 95.1% of the respondents stated that they were aware of the recommendations on coughing and sneezing etiquette and regular hand hygiene, respectively. While the recommendations of staying in a single room, having regular ventilation and keeping a distance of 1.5m were also widely known, the recommendation to wear a mouth–nose covering inside their house or flat was less well known, especially among CPs ( $p < .001$ ) (Table S1).

### Implementation of the recommendations

On the 6-item endpoint-named interval scale for implementation of interventions, the three CBRs 'Do not leave your home' (IP: mean= $5.9 \pm 0.4$ ; CP: mean= $5.8 \pm 0.7$ ), 'Do not receive visitors' (IP: mean= $6.0 \pm 0.3$ ; CP: mean= $5.9 \pm 0.5$ ) and 'Avoid personal contact with postal and delivery workers' (IP: mean= $5.9 \pm 0.4$ ; CP: mean= $5.9 \pm 0.5$ ) achieved very high rates of implementation. CPs implemented the HBRs to a somewhat lesser degree ( $p < .001$ ). The HBRs on regular ventilation (IP: mean= $5.7 \pm 0.7$ ; CP: mean= $5.7 \pm 0.7$ ) and hand washing (IP: mean= $5.7 \pm 0.7$ ; CP: mean= $5.7 \pm 0.7$ ) were quite well implemented, with no appreciable differences between IPs and CPs here ( $p = .275$  and  $p = .363$ ). Comparatively worse was the implementation of the HBRs on staying in a single room (IP: mean= $4.9 \pm 1.5$ ; CP: mean= $4.4 \pm 1.6$ ), keeping a distance of 1.5m (IP: mean= $5.2 \pm 1.4$ ; CP: mean= $4.7 \pm 1.6$ ) and wearing a mouth-nose mask (IP: mean= $5.2 \pm 1.5$ ; CP: mean= $4.7 \pm 1.8$ ). These recommendations, which involve distancing oneself from other household members, were implemented significantly better by the IPs than by the CPs ( $p < .001$ ) (see Figure 2 and Table S2).

### Baseline adherence score

The mean baseline adherence score was  $13.8 \pm 2.4$  out of 15 points (= 100%), equivalent to an adherence rate of 92.8%. Only 0.7% ( $N=68$ ) of respondents did not observe any of the CBRs, obtaining a score of 0 points. Of the respondents, 70.8% fully implemented the included recommendations, corresponding to a baseline adherence score of 15 points. IPs achieved significantly higher adherence scores than did CPs ( $14.3 \pm 2.0$  points vs.  $13.7 \pm 2.6$  points;  $p < .001$ ), representing a baseline adherence of 95.3% (IPs) vs. 91.2% (CPs). In total, 64.9% of contacts and 80.0% of index persons achieved a baseline adherence score of 15 points or 100%. The detailed distribution of the baseline adherence score is shown in the supplement (Table S5).

### Household adherence score

The mean household adherence score was  $17.2 \pm 6.8$  out of 25 points (=100%), equivalent to an adherence rate of 68.8%. Of the respondents, 2.2% ( $N=67$ ) did not observe any of the HBRs, obtaining a score of 0 points, whereas 18.2% fully implemented all included recommendations, corresponding to a household adherence score of 25 points. IPs achieved a significantly higher adherence score than did CPs ( $18.2 \pm 6.7$  points vs.  $16.5 \pm 6.8$  points;  $p < .001$ ), representing a household adherence of 72.9% (IPs) vs. 66.0% (CPs). In total, 22.8% of

1  
2  
3 IPs and 15.1% of CPs achieved a household adherence score of 25 points. The detailed  
4 distribution of the household adherence score is shown in the supplement (Table S6).  
5

### 6 **Difficulties of implementation**

7  
8 The greatest implementation difficulties were found for the recommendations requiring  
9 distancing from familiar people. The most problematic was the implementation of seclusion  
10 in a single room (IP: mean=2.9±1.9; CP: mean=2.6±1.8; 1=very difficult; 6=not difficult at all).  
11 The recommendation to wear a mouth–nose covering when in contact with other household  
12 members (IP: mean=4.4±1.9; CP: mean=3.9±2.0), to keep a distance of 1.5m (IP:  
13 mean=3.8±2.0; CP: mean=3.4±2.0), to avoid visitors (IP: mean=4.7±1.7; CP: mean=4.2±1.8)  
14 and to stay at home (IP: 4.2; CP: 3.6) were also comparatively difficult to implement. In  
15 contrast, the recommendations on regular hand washing (IP: mean=5.6±0.9; CP:  
16 mean=5.6±0.9), airing (IP: mean=5.6±1.0; CP: mean=5.5±1.0) and avoiding contact with  
17 delivery and postal workers (IP: mean=5.6±1.0; CP: mean=5.5±1.1) were easy to implement.  
18 While there were no significant differences in the perceived difficulty of implementing the  
19 recommendations on airing and hand washing between IPs and CPs ( $p=.483$  and  $p=.219$ ), the  
20 implementation of the other recommendations mentioned previously was perceived as more  
21 difficult by CPs than by IPs ( $p<.001$ ) (see Figure 2 and Table S3).  
22  
23  
24  
25

### 26 **Views on isolation and quarantine for COVID-19**

#### 27 Perceived Severity Perceived Susceptibility

28  
29 On the six-point Likert scale, both IPs and CPs considered the coronavirus relatively dangerous  
30 (IP: mean=5.4±1.1; CP: mean=5.5±0.9). CPs perceived the coronavirus as significantly more  
31 dangerous than IPs ( $p<0.01$ ).  
32  
33

#### 34 Perceived Benefits

35  
36 While the statement that isolation/quarantine protects oneself received comparatively low  
37 agreement among both IPs and CPs (IP: mean=3.7±2.1; CP: mean=3.9±2.0), the statement that  
38 isolation/quarantine protects other household members (IP: mean=4.6±1.8; CP:  
39 mean=4.4±1.9), as well as society, from the further spread of the coronavirus (IP:  
40 mean=5.8±0.7; CP: mean=5.8±0.7) received high or very high agreement.  
41  
42

#### 43 Perceived Barriers

44  
45 Supply shortages for everyday necessities (IP: mean=2.4±1.7; CP: mean=2.3±1.7), as well as  
46 financial losses (IP: mean=1.8±0.4; CP: mean=1.8±0.4; 1=yes, 2=no), did not seem to have  
47 existed to any great extent for participants during isolation/quarantine. There was no  
48 significant difference between IPs and CPs in this regard ( $p=.061$  and  $p=.271$ ).  
49

#### 50 Expected Results

51  
52 There was also low agreement with the statements that the isolation/quarantine measures  
53 were too strict (IP: mean=2.2±1.7; CP: mean=2.5±1.7) or too lax (IP: mean=2.4±1.7; CP:  
54 mean=2.4±1.6).  
55

#### 56 Psychological Characteristics/Peer Group Pressure

57  
58 Many respondents seemed to feel social pressure to implement the recommendations (IP:  
59 mean=5.5±1.2; CP: mean=5.3±1.3). IPs were significantly more likely to report having felt  
60 social pressure ( $p<.001$ ).



#### Health Knowledge/Cue to Action

IPs, in particular, showed a high level of agreement with the statements that they had been informed about the recommended behavioural measures of isolation/quarantine and the reason for these measures (IP: mean=5.3±1.3; CP: mean=4.8±1.7) (see Table S4).

### Factors influencing adherence during isolation and quarantine

Regression analysis was used to determine factors influencing baseline adherence scores. The baseline models are shown in the supplement (Table S7). The final models are shown in Table 3. A total of 7173 subjects were included in the regression analysis of the baseline adherence score. Factors correlating with higher baseline scores included status as an IP ( $\beta=-0.102$ ;  $p<.001$ ), older age ( $\beta=0.055$ ;  $p<.001$ ), presence of children in the household ( $\beta=-0.037$ ;  $p=.008$ ) and agreement with the following statements: 'It was explained to me in an understandable way how to behave in quarantine' ( $\beta=0.136$ ;  $p<.001$ ); 'When I isolate quarantine myself, I am protecting other members of my household' ( $\beta=0.046$ ;  $p<.001$ ); 'When I isolate quarantine myself, I am protecting our society from the further spread of the coronavirus' ( $\beta=0.049$ ;  $p<.001$ ) and 'People in my professional and social environment have expected me to implement the quarantine measures' ( $\beta=0.069$ ;  $p<.001$ ). Agreement with the statements that the isolation/quarantine measures were too strict ( $\beta=-0.049$ ;  $p<.001$ ) or too lax ( $\beta=-0.033$ ;  $p=0.004$ ) or that there were supply difficulties during isolation/quarantine ( $\beta=-0.042$ ;  $p<.001$ ) was associated with a lower baseline adherence score. The model explained 6.6% (corr.  $R^2$ ) of the variance.

Factors influencing household adherence scores were analysed analogously (see supplement Table S7 and Table 3). A total of 2227 subjects were included in the regression analysis of the household adherence score. Here, factors correlating with higher household adherence scores included IP status ( $\beta=-0.103$ ;  $p<.001$ ), older age ( $\beta=0.108$ ;  $p<.001$ ), male gender ( $\beta=0.043$ ;  $p=0.030$ ), migration background ( $\beta=0.058$ ;  $p=.004$ ), lower SES ( $\beta=-0.045$ ;  $p=0.025$ ), living in a relationship ( $\beta=0.099$ ;  $p<.001$ ), having children in the household ( $\beta=-0.058$ ;  $p=0.028$ ), considering coronavirus dangerous ( $\beta=0.052$ ;  $p=0.011$ ) and agreement with the following statements: 'I have been given clear information about the reason for the isolation/quarantine' ( $\beta=0.060$ ;  $p=0.014$ ), 'It was explained in an understandable way how to behave in isolation/quarantine' ( $\beta=0.047$ ;  $p=0.051$ ), 'When I isolate/quarantine myself, I am protecting other members of my household' ( $\beta=0.240$ ;  $p<.001$ ) and 'When I isolate/quarantine myself, I am protecting our society from the further spread of the coronavirus' ( $\beta=0.037$ ;  $p=0.072$ ). In addition, there was a positive association between financial losses due to quarantine and household adherence ( $\beta=-0.034$ ;  $p=0.090$ ). The model explained 14.4% (corr.  $R^2$ ) of the variance.

Table 3: Factors influencing the baseline and household adherence scores. Final models of linear backward regression analyses \*(disagree=1, agree=2)

| Final Models | Non-Standardised Coefficients |            | Standardised Coefficients | Sig. | 95% Confidence Interval |             |
|--------------|-------------------------------|------------|---------------------------|------|-------------------------|-------------|
|              | Regression Coefficient (B)    | Std. Error |                           |      | Lower Limit             | Upper Limit |
|              |                               |            | Beta                      |      |                         |             |

| <b>Baseline adherence score</b>                                                                                    |        |        |        |       |        |        |
|--------------------------------------------------------------------------------------------------------------------|--------|--------|--------|-------|--------|--------|
| <b>Infected persons (1) vs. Contact persons (2)</b>                                                                | -0.030 | 0.003  | -0.102 | <.001 | -0.037 | -0.024 |
| <b>Age (years)</b>                                                                                                 | 0.001  | <0.001 | 0.055  | <.001 | <0.001 | 0.001  |
| <b>Having children (yes=1, no=2)</b>                                                                               | -0.011 | 0.004  | -0.037 | .008  | -0.019 | -0.003 |
| <b>When I isolate/quarantine myself, I am protecting other members of my household. *</b>                          | 0.015  | 0.004  | 0.046  | <.001 | 0.007  | 0.022  |
| <b>When I isolate/quarantine myself, I am protecting our society from the further spread of the coronavirus. *</b> | 0.049  | 0.013  | 0.045  | <.001 | 0.024  | 0.073  |
| <b>I experienced difficulties in obtaining everyday necessities during isolation/quarantine *</b>                  | -0.014 | 0.004  | -0.042 | <.001 | -0.022 | -0.006 |
| <b>I think the isolation/quarantine measures are too strict. *</b>                                                 | -0.016 | 0.004  | -0.049 | <.001 | -0.024 | -0.009 |
| <b>I think the isolation/quarantine measures are too lax. *</b>                                                    | -0.011 | 0.004  | -0.033 | .004  | -0.019 | -0.004 |
| <b>People in my professional and social environment have expected me to implement the quarantine measures. *</b>   | 0.037  | 0.006  | 0.069  | <.001 | 0.025  | 0.049  |
| <b>It was explained to me in an understandable way how to behave in quarantine. *</b>                              | 0.051  | 0.004  | 0.136  | <.001 | 0.043  | 0.060  |
| <b>Household adherence score</b>                                                                                   |        |        |        |       |        |        |
| <b>Infected persons (1) vs. Contact persons (2)</b>                                                                | -0.052 | 0.010  | -0.103 | <.001 | -0.072 | -0.032 |
| <b>Age (years)</b>                                                                                                 | 0.002  | <0.001 | 0.108  | <.001 | 0.001  | 0.003  |
| <b>Sex (female=1, male=2)</b>                                                                                      | 0.022  | 0.010  | 0.043  | .030  | 0.002  | 0.042  |
| <b>Migration background (no= 1, yes=2)</b>                                                                         | 0.064  | 0.022  | 0.058  | .004  | 0.021  | 0.107  |
| <b>Socioeconomic status (SES) (high=1, middle and low=2)</b>                                                       | -0.028 | 0.012  | -0.045 | .025  | -0.052 | -0.004 |
| <b>Married/living in a relationship (no=1, yes=2)</b>                                                              | 0.062  | 0.014  | 0.099  | <.001 | 0.035  | 0.090  |
| <b>Having children (yes=1, no=2)</b>                                                                               | -0.029 | 0.013  | -0.058 | .028  | -0.054 | -0.003 |
| <b>I think the coronavirus is dangerous. *</b>                                                                     | 0.059  | 0.023  | 0.052  | .011  | 0.014  | 0.104  |
| <b>I have been given clear information about the reason for the isolation/quarantine. *</b>                        | 0.042  | 0.017  | 0.060  | .014  | 0.009  | 0.076  |
| <b>It was explained to me in an understandable way how to behave in quarantine. *</b>                              | 0.031  | 0.016  | 0.047  | .051  | <0.001 | 0.063  |
| <b>When I isolate/quarantine myself, I am protecting other members of my household. *</b>                          | 0.145  | 0.012  | 0.240  | <.001 | 0.121  | 0.169  |
| <b>When I isolate/quarantine myself, I am protecting our society from the further spread of the coronavirus. *</b> | 0.074  | 0.041  | 0.037  | .072  | -0.007 | 0.154  |
| <b>I suffered financial losses due to the isolation/quarantine (yes=1, no=2)</b>                                   | -0.021 | 0.012  | -0.034 | .090  | -0.045 | 0.003  |

## DISCUSSION

To our knowledge, this study is one of the first studies in Germany of adherence to recommendations while in official domestic isolation or quarantine during the COVID-19



1  
2  
3 pandemic. The study showed that the measures for seclusion from the public were especially  
4 well implemented (92.8% adherence). Adherence to measures requiring distancing from other  
5 household members reached only 68.8%. The measures calling for seclusion in a single room  
6 and keeping a distance of 1.5 m from other household members were both particularly  
7 difficult to implement. By contrast, regular airing and washing of hands, as well as avoiding  
8 contact with delivery and postal workers, were easier. The lower adherence to measures of  
9 separating from other household members aligns with the results of a study by Broichhaus et  
10 al. on COVID-19 transmission routes conducted at about the same time in Cologne, according  
11 to which a large proportion of infections occurred within the same household.[32]  
12  
13  
14

15 In the present study, men were more adherent than women, older people more adherent  
16 than younger people and IPs more adherent than CPs. The higher adherence of IPs could be  
17 due to their knowledge of acute contagiousness and a more direct benefit from the  
18 behavioural measures. However, the extent to which the higher adherence of IPs can also be  
19 attributed to symptom-related immobility remains speculative. It is evident that CPs, in  
20 particular, must be informed about the meaning and benefits of quarantine, especially if they  
21 are unvaccinated.  
22  
23

24 Al-Hanawi et al., Al-Zabadi et al. and Park et al. also found higher adherence among older  
25 people in survey studies on the implementation of social distancing measures in the general  
26 population, as did Smith et al. in a study on self-isolation at the onset of COVID-19 symptoms  
27 in a British cohort.[3, 33–35] However, in all four studies, women were more likely to  
28 implement the relevant measures. Why men performed better on HBRs in our study can only  
29 be speculated here. As the Mannheim–Corona study by Cornesse et al. suggests, women (still)  
30 feel more obliged to take on household tasks, even during quarantine.[36] Smith et al. showed  
31 lower adherence in their study among subjects with younger children in the household.  
32 However, the only criterion for adherent behaviour in their study was whether the subjects  
33 left their home.[35] Our study found a positive correlation between the presence of children  
34 in the household and greater adherence, accounting for all relevant isolation/quarantine  
35 recommendations. Subjects with children in the household implemented the HBRs  
36 significantly better than did subjects without children at home. The reason for this could be  
37 the high motivation of many parents to protect their children from infection. However, the  
38 extent to which psychosocial reasons played a role here, such as the feeling of loneliness or  
39 existential hardship, can only be speculated at this point.  
40  
41  
42  
43  
44

45 These speculations are supported by the results from the Health Belief Model. Thus, the  
46 measures were predominately perceived as appropriate and not too strict. In addition to the  
47 perceived risks associated with a given disease, the assumed costs and benefits of different  
48 behaviours also influence the extent of behavioural change.[20]  
49  
50

51 Subjects who stated that they had been clearly informed about both the reason for their  
52 isolation or quarantine and the scope of the measures mandated showed greater adherence  
53 to the measures, considering 'Health knowledge', resp. the construct 'Cues to Action' in the  
54 Health Belief Model. Adherence was also positively influenced by the assessment of the  
55 measures as appropriate, as well as by the perception of social pressure in relation to their  
56 implementation, which can be attributed to the constructs Expected Results and Psychological  
57 Characteristics/ Peer Group Pressure. The construct Perceived Severity Susceptibility reflected  
58 the perception that COVID-19 is dangerous and had a further positive influence on household  
59 adherence. In cross-sectional studies of perceptions of the coronavirus and social distancing  
60

1  
2  
3 measures, Hills et al. and Al-Sabbagh et al. found that the perceived dangerousness of  
4 infection and identifying oneself as belonging to a risk group were both associated with higher  
5 adherence.[4, 11] Results are contradictory with regard to the construct of Perceived Barriers.  
6 While Al-Sabbagh et al. also found that a perceived financial disadvantage related to social  
7 distancing measures correlated with lower adherence, the present study associated higher  
8 expenditures or financial losses due to isolation or quarantine with higher household  
9 adherence.[11] This fact could be explained by a certain retrospective aspect of our study:  
10 those who adhered more strictly to the measures may, as a result, have had higher costs (e.g.  
11 for hygiene items or delivery services).  
12  
13  
14

### 15 **Strengths and limitations**

16 A particular strength of this survey was its large, homogeneous cohort and its detailed  
17 consideration of the various recommendations, taking quarantine reason (IP or CP) motivation  
18 into account. Even though this survey was limited to the catchment area of the largest health  
19 department in Germany, the measures were largely uniform across Germany, and the  
20 approaches taken by the various health departments were comparable. This makes it quite  
21 likely that the findings can be transferred reliably to other urban regions. It must be  
22 particularly emphasised that this was a full census, taking into account the inclusion and  
23 exclusion criteria. However, mainly people with higher SES and without a migration  
24 background participated, making it difficult to transfer the findings to other target groups.  
25 Psychological, cultural–religious factors and coping strategies, which possibly also influenced  
26 adherence, were not taken into account. One further limitation, however, was the online  
27 format, which could have prevented older participants, particularly those who are less  
28 computer-literate, from participating. However, the average age of the study participants, at  
29 40.9 years, is 13 months below the average age of the Cologne population.[37] Furthermore,  
30 when interpreting the results, it must be taken into account that citizens placed under  
31 isolation/quarantine orders were informed that non-compliance with certain measures,  
32 especially leaving one's own home, could be punished. Even though the anonymity of  
33 participation was explicitly mentioned in our survey, it cannot be ruled out that the threat of  
34 subsequent punishment led to desired and less honest answers.  
35  
36  
37  
38  
39  
40

41 Moreover, it is plausible that more of those who complied with the prescribed measures took  
42 part in the survey.  
43  
44

### 45 **CONCLUSIONS**

46 In summary, adherence was quite high overall, especially with regard to the general  
47 isolation/quarantine rules. However, with high infection rates in households with an index  
48 case in the past, and the comparatively lower adherence to isolation and quarantine within  
49 one household found in this study, it still seems sensible to develop more strategies for  
50 increasing adherence, particularly within households.[38] The pandemic has been ongoing for  
51 more than two years, and with the emergence of new viral variants such as Omicron and its  
52 subtypes, associated weakened vaccine effectiveness and a still-significant number of  
53 unvaccinated people, the importance of non-drug measures is clear. As Telenti et al. have  
54 indicated, responsible management of COVID-19 will continue to be relevant in the future.[39]  
55 Thus, to support staff in health offices in their care of citizens, adequate education on the  
56 benefits of quarantine measures should be implemented in the public sphere. This might also  
57 lead to increased adherence, especially within a household. The approach to successful risk  
58 communication outlined by Loss et al., which includes credible messages, acknowledgement  
59  
60

1  
2  
3 of uncertainties and a balance of reassurance and alarm, combined with continuous  
4 monitoring and evaluation, could be used as a guide to preventing fatigue in future pandemics  
5 and in the ongoing development of COVID-19.[40]  
6  
7

#### 8 Key messages and implications 9

- 10 • Measures of seclusion from other household members are followed more weakly  
11 overall than are measures of seclusion from the public.
- 12 • Not only uninfluenceable demographic factors such as age, gender, education level  
13 or index-person status but also the personal views and beliefs of those affected  
14 influence adherence to quarantine and isolation.
- 15 • Responsible health authorities can increase the adherence of citizens in isolation and  
16 quarantine by providing comprehensible information about the reason, benefits and  
17 scope of the recommended behavioural measures.
- 18 • Particular attention should be paid to contact persons and those who must isolate  
19 themselves from others within the same household.  
20  
21  
22  
23

#### 24 **Author Contributions**

25 CJ, AK, JN and GAW conducted the study on behalf of the CoCo-Fakt study group, JB conducted  
26 the questions regarding the quarantine recommendations, CJ and JB conducted the statistical  
27 analyses, AK, CJ and JB contributed to interpreting the results, JB wrote the original draft of  
28 the manuscript, AK, CJ, GAW, BG, LB, and JN provided comments and inputs to revise the  
29 manuscript.  
30  
31

#### 32 **Competing interests**

33 None declared.  
34  
35

#### 36 **Funding**

37 The authors have not declared a specific grant for this research from any funding agency in  
38 the public, commercial or not-for-profit sectors.  
39  
40

#### 41 **Data sharing statement**

42 Data are available upon reasonable request.  
43  
44

#### 45 **Acknowledgements**

46 The authors would like to thank Nikola Schmidt for her support with the programming of the  
47 online survey. Additionally, they would also like to thank everyone who helped with the  
48 pretest and who participated in the survey.  
49  
50

#### 51 **Ethics approval**

52 This study involves human participants. Ethics approval was obtained from the Rheinisch-  
53 Westfälische Technische Hochschule Aachen Human Ethics Research Committee (351/20).  
54  
55

#### 56 **Patient consent for publication**

57 Not required.  
58  
59  
60

## REFERENCES

- 1 Nussbaumer-Streit B, Mayr V, Dobrescu AI, et al. Quarantine alone or in combination with other public health measures to control COVID-19: a rapid review. *Cochrane Database Syst Rev* 2020;9(9):CD013574.
- 2 Patel J, Fernandes G, Sridhar D. How can we improve self-isolation and quarantine for covid-19? *BMJ* 2021;372:n625.
- 3 Al-Hanawi MK, Angawi K, Alshareef N, et al. Knowledge, Attitude and Practice Toward COVID-19 Among the Public in the Kingdom of Saudi Arabia: A Cross-Sectional Study. *Front Public Health* 2020;8:217.
- 4 Hills S, Eraso Y. Factors associated with non-adherence to social distancing rules during the COVID-19 pandemic: a logistic regression analysis. *BMC Public Health* 2021;21(1):352.
- 5 Clark C, Davila A, Regis M, et al. Predictors of COVID-19 voluntary compliance behaviors: An international investigation. *Glob Transit* 2020;2:76–82.
- 6 Crane MA, Shermock KM, Omer SB, et al. Change in Reported Adherence to Nonpharmaceutical Interventions During the COVID-19 Pandemic, April–November 2020. *JAMA* 2021;325(9):883–85.
- 7 Lüdecke D, Knesebeck O von dem. Protective Behavior in Course of the COVID-19 Outbreak-Survey Results From Germany. *Front Public Health* 2020;8:572561.
- 8 Szwarcwald CL, Souza Júnior PRB de, Malta DC, et al. Adherence to physical contact restriction measures and the spread of COVID-19 in Brazil. *Epidemiol Serv Saude* 2020;29(5):e2020432.
- 9 Solomou I, Constantinidou F. Prevalence and Predictors of Anxiety and Depression Symptoms during the COVID-19 Pandemic and Compliance with Precautionary Measures: Age and Sex Matter. *Int J Environ Res Public Health* 2020;17(14).
- 10 Wang C, Pan R, Wan X, et al. Immediate Psychological Responses and Associated Factors during the Initial Stage of the 2019 Coronavirus Disease (COVID-19) Epidemic among the General Population in China. *Int J Environ Res Public Health* 2020;17(5).
- 11 Al-Sabbagh MQ, Al-Ani A, Mafrachi B, et al. Predictors of adherence with home quarantine during COVID-19 crisis: the case of health belief model. *Psychol Health Med* 2022;27(1):215–27.
- 12 Kunzler AM, Röthke N, Günthner L, et al. Mental burden and its risk and protective factors during the early phase of the SARS-CoV-2 pandemic: systematic review and meta-analyses. *Global Health* 2021;17(1):34.
- 13 Rajkumar RP. COVID-19 and mental health: A review of the existing literature. *Asian Journal of Psychiatry* 2020;52:102066.
- 14 Carlsen EØ, Caspersen IH, Trogstad L, et al. Public adherence to governmental recommendations regarding quarantine and testing for COVID-19 in two Norwegian cohorts. *MedRxiv* 2020.12.18.20248405 [Preprint]. December 20, 2020. [cited 2022 Sep 17]. <https://doi.org/10.1101/2020.12.18.20248405>.
- 15 Verberk JDM, Anthierens SA, Tonkin-Crine S, et al. Experiences and needs of persons living with a household member infected with SARS-CoV-2: A mixed method study. *PLoS ONE* 2021;16(3):e0249391.
- 16 Andrews N, Stowe J, Kirsebom F, et al. Covid-19 Vaccine Effectiveness against the Omicron (B.1.1.529) Variant. *N Engl J Med* 2022;386(16):1532–46.
- 17 Hsu L, Grüne B, Buess M, et al. COVID-19 Breakthrough Infections and Transmission Risk: Real-World Data Analyses from Germany's Largest Public Health Department (Cologne). *Vaccines (Basel)* 2021;9(11).

- 1  
2  
3 18 Joisten C, Kossow A, Book J, et al. How to manage quarantine-adherence, psychosocial  
4 consequences, coping strategies and lifestyle of patients with COVID-19 and their  
5 confirmed contacts: study protocol of the CoCo-Fakt surveillance study, Cologne,  
6 Germany. *BMJ Open* 2021;11(4):e048001.  
7  
8 19 Tong KK, Chen JH, Yu EW-Y, et al. Adherence to COVID-19 Precautionary Measures:  
9 Applying the Health Belief Model and Generalised Social Beliefs to a Probability  
10 Community Sample. *Appl Psychol Health Well Being* 2020;12(4):1205–23.  
11  
12 20 Rosenstock IM. The Health Belief Model and Preventive Health Behavior. *Health*  
13 *Education Monographs* 1974;2(4):354–86.  
14  
15 21 Carpenter CJ. A meta-analysis of the effectiveness of health belief model variables in  
16 predicting behavior. *Health Commun* 2010;25(8):661–69.  
17  
18 22 Neuhann F, Buess M, Wolff A, et al. Entwicklung einer Software zur Unterstützung der  
19 Prozesse im Gesundheitsamt der Stadt Köln in der SARS-CoV-2-Pandemie, Digitales  
20 Kontaktmanagement (DiKoMa). *Epidemiologisches Bulletin* 2020;2020(23):3–11.  
21  
22 23 Betsch C, Wieler L, Bosnjak M, et al. Germany COVID-19 Snapshot MOonitoring (COSMO  
23 Germany): Monitoring knowledge risk perceptions preventive behaviours and public  
24 trust in the current coronavirus outbreak in Germany. *PsychArchives*; 2020. Available  
25 at: <https://doi.org/10.23668/psycharchives.2776> Accessed September 17, 2022.  
26  
27 24 World Health Organization. Home care for patients with suspected or confirmed  
28 COVID-19 and management of their contacts 2020. Available at:  
29 [https://www.who.int/publications/i/item/home-care-for-patients-with-suspected-](https://www.who.int/publications/i/item/home-care-for-patients-with-suspected-novel-coronavirus-(ncov)-infection-presenting-with-mild-symptoms-and-management-of-contacts)  
30 [novel-coronavirus-\(ncov\)-infection-presenting-with-mild-symptoms-and-management-](https://www.who.int/publications/i/item/home-care-for-patients-with-suspected-novel-coronavirus-(ncov)-infection-presenting-with-mild-symptoms-and-management-of-contacts)  
31 [of-contacts](https://www.who.int/publications/i/item/home-care-for-patients-with-suspected-novel-coronavirus-(ncov)-infection-presenting-with-mild-symptoms-and-management-of-contacts) Accessed September 17, 2022.  
32  
33 25 European Centre for Disease Prevention and Control. Infection prevention and control  
34 in the household management of people with suspected or confirmed coronavirus  
35 disease (COVID-19) 2020. Available at:  
36 [https://www.ecdc.europa.eu/sites/default/files/documents/Home-care-of-COVID-19-](https://www.ecdc.europa.eu/sites/default/files/documents/Home-care-of-COVID-19-patients-2020-03-31.pdf)  
37 [patients-2020-03-31.pdf](https://www.ecdc.europa.eu/sites/default/files/documents/Home-care-of-COVID-19-patients-2020-03-31.pdf) Accessed September 17, 2022.  
38  
39 26 Robert Koch-Institut. Häusliche Isolierung bei bestätigter COVID-19-Erkrankung 2021.  
40 Available at:  
41 [https://www.rki.de/DE/Content/InfAZ/N/Neuartiges\\_Coronavirus/Flyer\\_Patienten.pdf?](https://www.rki.de/DE/Content/InfAZ/N/Neuartiges_Coronavirus/Flyer_Patienten.pdf?__blob=publicationFile)  
42 [\\_\\_blob=publicationFile](https://www.rki.de/DE/Content/InfAZ/N/Neuartiges_Coronavirus/Flyer_Patienten.pdf?__blob=publicationFile) Accessed September 17, 2022.  
43  
44 27 Kaduszkiewicz H, Kochen M, Pömsl J. Handlungsempfehlung Häusliche Isolierung von  
45 CoViD-19-Fällen mit leichtem Krankheitsbild und Verdachtsfällen 2020. Available at:  
46 [https://www.degam.de/files/Inhalte/Leitlinien-Inhalte/Dokumente/DEGAM-S1-](https://www.degam.de/files/Inhalte/Leitlinien-Inhalte/Dokumente/DEGAM-S1-Handlungsempfehlung/053-054%20SARS-CoV-2%20und%20Covid-19/Publikationsdokumente%20Archiv/053-054_Empfehlungen%20Haeusliche_Isolierung.pdf)  
47 [Handlungsempfehlung/053-054%20SARS-CoV-2%20und%20Covid-](https://www.degam.de/files/Inhalte/Leitlinien-Inhalte/Dokumente/DEGAM-S1-Handlungsempfehlung/053-054%20SARS-CoV-2%20und%20Covid-19/Publikationsdokumente%20Archiv/053-054_Empfehlungen%20Haeusliche_Isolierung.pdf)  
48 [19/Publikationsdokumente%20Archiv/053-](https://www.degam.de/files/Inhalte/Leitlinien-Inhalte/Dokumente/DEGAM-S1-Handlungsempfehlung/053-054%20SARS-CoV-2%20und%20Covid-19/Publikationsdokumente%20Archiv/053-054_Empfehlungen%20Haeusliche_Isolierung.pdf)  
49 [054\\_Empfehlungen%20Haeusliche\\_Isolierung.pdf](https://www.degam.de/files/Inhalte/Leitlinien-Inhalte/Dokumente/DEGAM-S1-Handlungsempfehlung/053-054%20SARS-CoV-2%20und%20Covid-19/Publikationsdokumente%20Archiv/053-054_Empfehlungen%20Haeusliche_Isolierung.pdf) Accessed September 17, 2022.  
50  
51 28 Lange C, Jentsch F, Allen J, et al. Data Resource Profile: German Health Update (GEDA)--  
52 the health interview survey for adults in Germany. *Int J Epidemiol* 2015;44(2):442–50.  
53  
54 29 Wang CC, Prather KA, Sznitman J, et al. Airborne transmission of respiratory viruses.  
55 *Science* 2021;373(6558).  
56  
57 30 German Federal Ministry of Health, Public Relations Division. Together against corona:  
58 How to protect ourselves against the coronavirus 2021. Available at:  
59 [https://assets.zusammengengencorona.de/eaae45wp4t29/59kagmqA8AWs87Jo2VgpTf/](https://assets.zusammengengencorona.de/eaae45wp4t29/59kagmqA8AWs87Jo2VgpTf/f826234fc4d8d58a891c9d159d2627aa/BMG_Infoflyer_kurz_Corona_English.pdf)  
60 [f826234fc4d8d58a891c9d159d2627aa/BMG\\_Infoflyer\\_kurz\\_Corona\\_English.pdf](https://assets.zusammengengencorona.de/eaae45wp4t29/59kagmqA8AWs87Jo2VgpTf/f826234fc4d8d58a891c9d159d2627aa/BMG_Infoflyer_kurz_Corona_English.pdf)  
Accessed September 17, 2022.



- 1  
2  
3  
4  
5  
6  
7  
8  
9  
10  
11  
12  
13  
14  
15  
16  
17  
18  
19  
20  
21  
22  
23  
24  
25  
26  
27  
28  
29  
30  
31  
32  
33  
34  
35  
36  
37  
38  
39  
40  
41  
42  
43  
44  
45  
46  
47  
48  
49  
50  
51  
52  
53  
54  
55  
56  
57  
58  
59  
60
- 31 Lin Y, Hu Z, Alias H, et al. Quarantine for the coronavirus disease (COVID-19) in Wuhan city: Support, understanding, compliance and psychological impact among lay public. *J Psychosom Res* 2021;144:110420.
- 32 Broichhaus L, Book J, Feddern S, et al. Where is the greatest risk of COVID-19 infection? Findings from Germany's largest public health department, Cologne. *PLoS ONE* 2022;17(8):e0273496.
- 33 Al Zabadi H, Yaseen N, Alhroub T, et al. Assessment of Quarantine Understanding and Adherence to Lockdown Measures During the COVID-19 Pandemic in Palestine: Community Experience and Evidence for Action. *Front Public Health* 2021;9:570242.
- 34 Park CL, Russell BS, Fendrich M, et al. Americans' COVID-19 Stress, Coping, and Adherence to CDC Guidelines. *J Gen Intern Med* 2020;35(8):2296–303.
- 35 Smith LE, Potts HWW, Amlôt R, et al. Adherence to the test, trace, and isolate system in the UK: results from 37 nationally representative surveys. *BMJ* 2021;372:n608.
- 36 Cornesse C, Gonzalez Ocanto M, Fikel M, et al. Measurement instruments for fast and frequent data collection during the early phase of COVID-19 in Germany: reflections on the Mannheim Corona Study. *Meas Instrum Soc Sci* 2022;4(1).
- 37 Stadt Köln - Amt für Stadtentwicklung und Statistik. Kölner Zahlenspiegel 2020. Available at: [https://www.stadt-koeln.de/mediaasset/content/pdf15/statistik-standardinformationen/k%C3%B6lner\\_zahlenspiegel\\_2020\\_deutsch.pdf](https://www.stadt-koeln.de/mediaasset/content/pdf15/statistik-standardinformationen/k%C3%B6lner_zahlenspiegel_2020_deutsch.pdf) Accessed September 17, 2022.
- 38 Madewell ZJ, Yang Y, Longini IM, et al. Household Transmission of SARS-CoV-2: A Systematic Review and Meta-analysis. *JAMA Netw Open* 2020;3(12):e2031756.
- 39 Telenti A, Arvin A, Corey L, et al. After the pandemic: perspectives on the future trajectory of COVID-19. *Nature* 2021;596(7873):495–504.
- 40 Loss J, Boklage E, Jordan S, et al. Risikokommunikation bei der Eindämmung der COVID-19-Pandemie: Herausforderungen und Erfolg versprechende Ansätze. *Bundesgesundheitsblatt Gesundheitsforschung Gesundheitsschutz* 2021;64(3):294–303.

## FOOTNOTES

I, the Submitting Author has the right to grant and does grant on behalf of all authors of the Work (as defined in the below author licence), an exclusive licence and/or a non-exclusive licence for contributions from authors who are: i) UK Crown employees; ii) where BMJ has agreed a CC-BY licence shall apply, and/or iii) in accordance with the terms applicable for US Federal Government officers or employees acting as part of their official duties; on a worldwide, perpetual, irrevocable, royalty-free basis to BMJ Publishing Group Ltd ("BMJ") its licensees and where the relevant Journal is co-owned by BMJ to the co-owners of the Journal, to publish the Work in BMJ Global Health and any other BMJ products and to exploit all rights, as set out in our [licence](#).

The Submitting Author accepts and understands that any supply made under these terms is made by BMJ to the Submitting Author unless you are acting as an employee on behalf of your employer or a postgraduate student of an affiliated institution which is paying any applicable article publishing charge ("APC") for Open Access articles. Where the Submitting Author wishes to make the Work available on an Open Access basis (and intends to pay the relevant APC), the terms of reuse of such Open Access shall be governed by a Creative Commons licence – details of these licences and which [Creative Commons](#) licence will apply to this Work are set out in our licence referred to above.

Legends:

Figure 1: Participants-Flow Chart

Figure 2: Relative distribution of implementation (left) and difficulty (right) of selected recommendations in domestic isolation and quarantine; separated for infected persons (IP) and their contacts (CP)



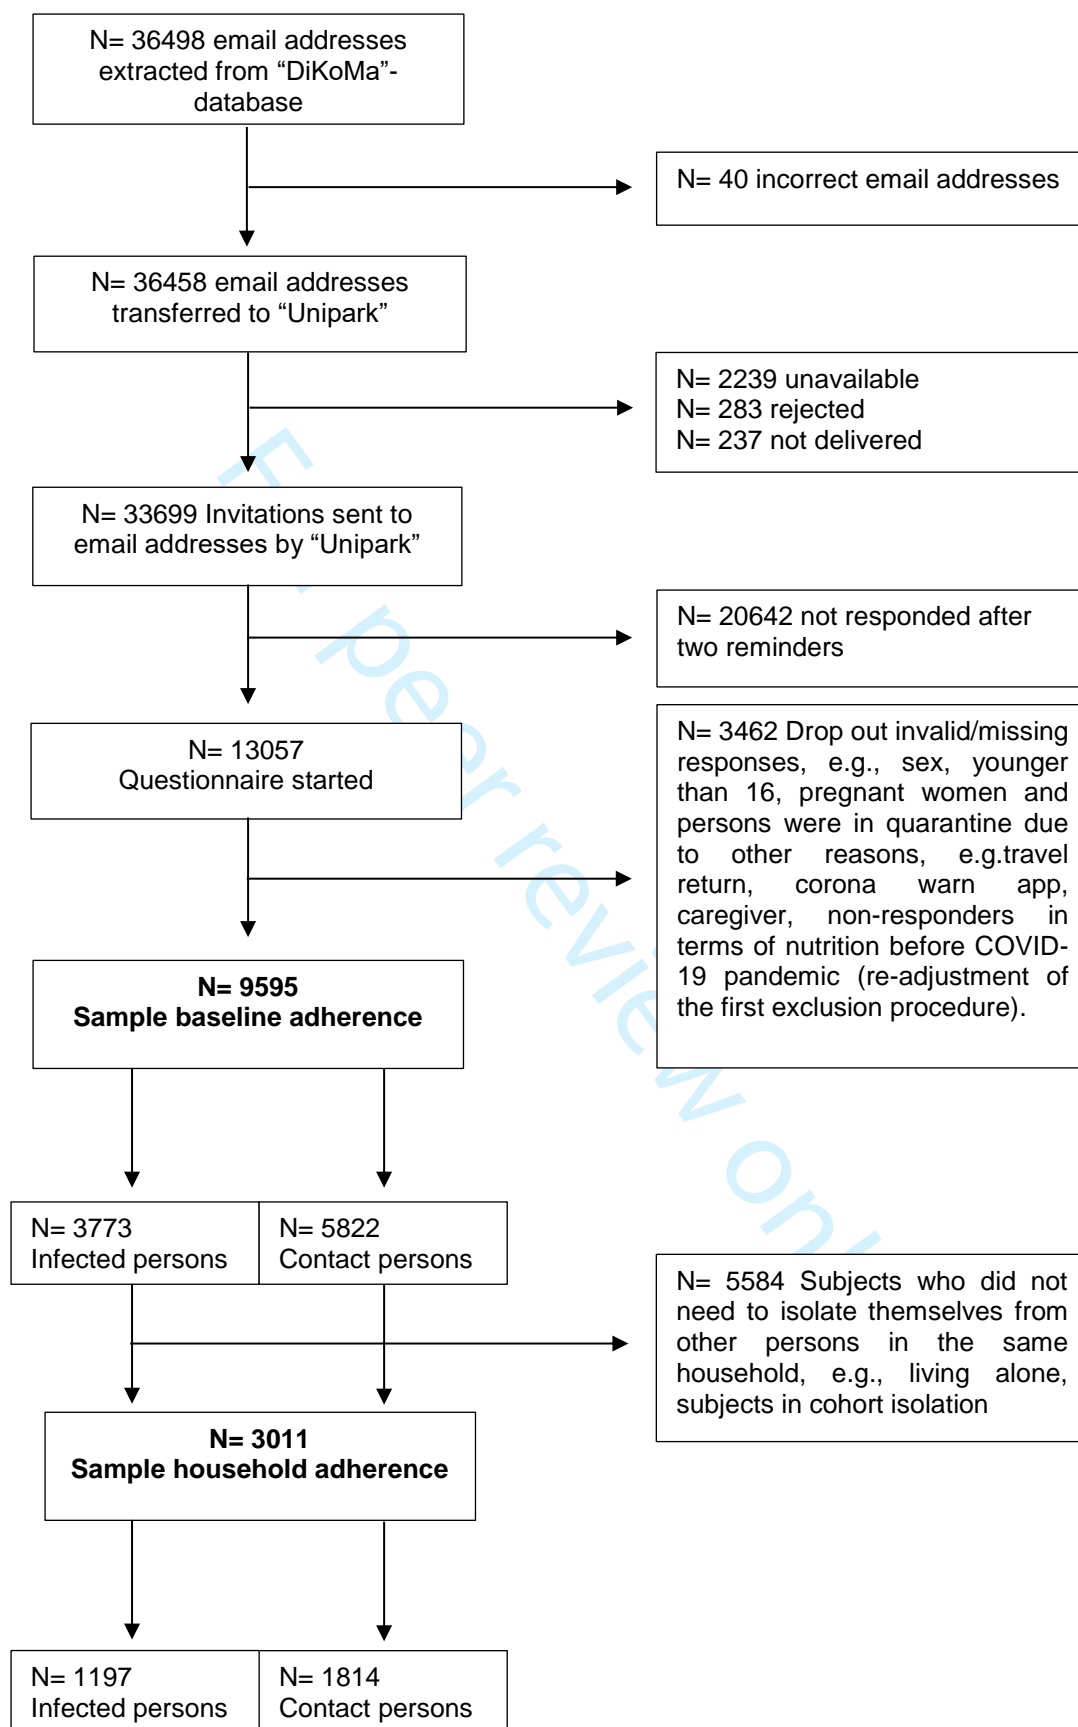

Staying at home

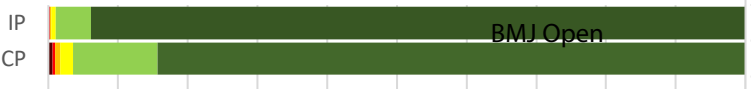

BMJ Open

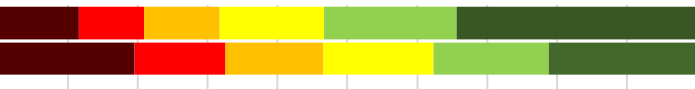

1

Not receiving visitors

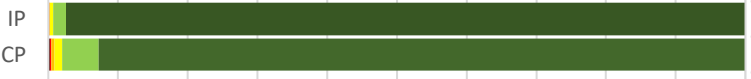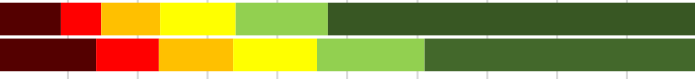

2

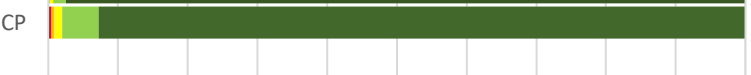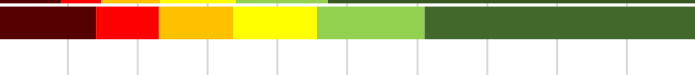

3

4

No contact with delivery workers

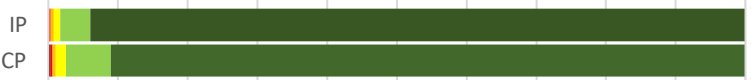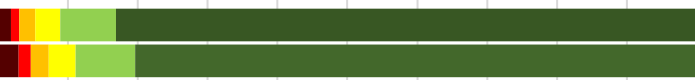

5

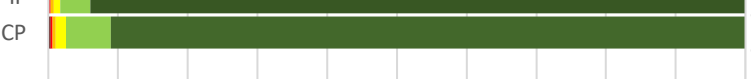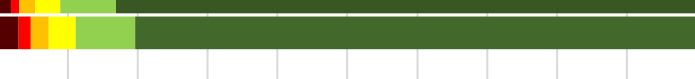

6

7

Staying in a single room

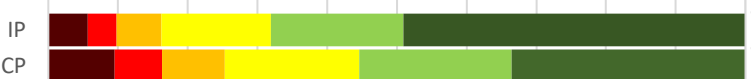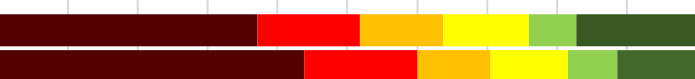

8

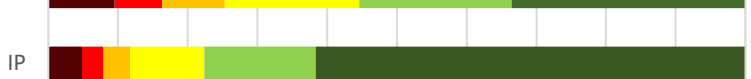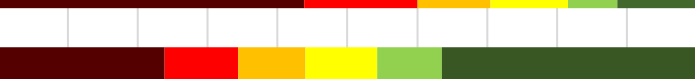

9

10

Keeping a distance of 1.5 m

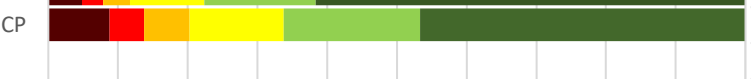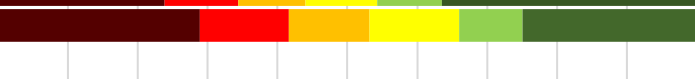

11

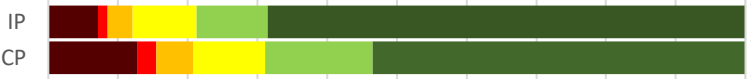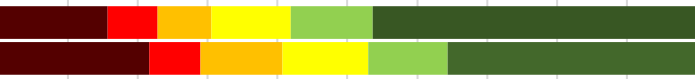

12

13

14

15

16

17

18

19

20

21

22

23

24

25

Wearing a mask

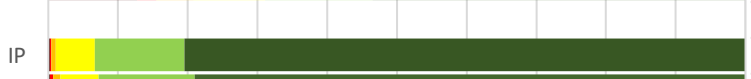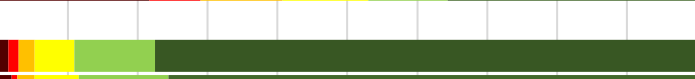

Regular ventilation

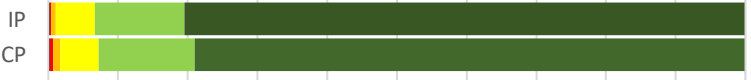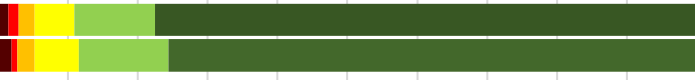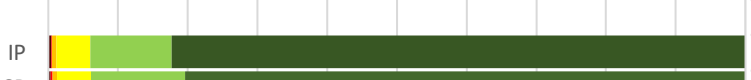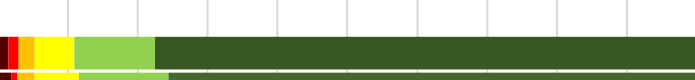

Hand hygiene

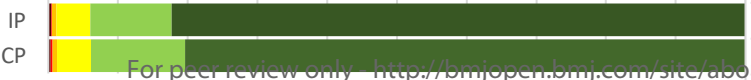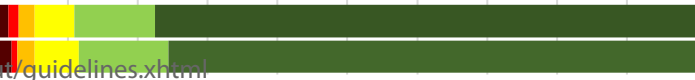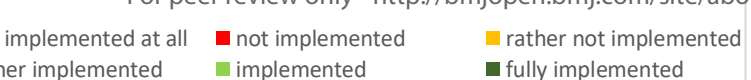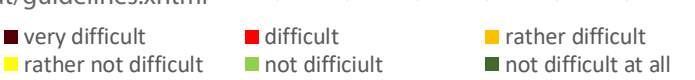

For peer review only - <http://bmjopen.bmj.com/site/about/guidelines.xhtml>

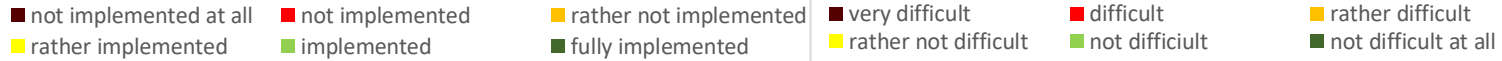

**SUPPLEMENTARY MATERIAL****Adherence to stay-at-home orders: awareness, implementation and difficulties of the officially ordered quarantine measures in the context of the COVID-19 pandemic in Cologne - a retrospective cohort study**

| <b>Table of contents</b> |                                                                                                                        |        |
|--------------------------|------------------------------------------------------------------------------------------------------------------------|--------|
| <b>Table S1</b>          | Awareness of isolation/quarantine recommendations                                                                      | Page 2 |
| <b>Table S2</b>          | Implementation of isolation/quarantine recommendations                                                                 | Page 3 |
| <b>Table S3</b>          | Difficulty of isolation/quarantine recommendations                                                                     | Page 4 |
| <b>Table S4</b>          | Views on COVID-19 in relation to quarantine                                                                            | Page 5 |
| <b>Table S5</b>          | Distribution of the baseline adherence score                                                                           | Page 6 |
| <b>Table S6</b>          | Distribution of the household adherence score                                                                          | Page 6 |
| <b>Table S7</b>          | Factors influencing the baseline and household adherence score; Baseline models of linear backward regression analyses | Page 7 |

Table S1: Awareness of isolation/quarantine recommendations. \*(yes=1; no=2); CBR=Community based recommendation; HBR= Household based recommendation

| Recommendation |                                                                                                                            | Infected persons |              |      | Contact persons |              |      | p-value |       |
|----------------|----------------------------------------------------------------------------------------------------------------------------|------------------|--------------|------|-----------------|--------------|------|---------|-------|
|                |                                                                                                                            | N                | Mean value * | SD   | N               | Mean value * | SD   |         |       |
| 1              | Do not leave your home.                                                                                                    | CBR              | 3773         | 1.01 | 0.11            | 5822         | 1.02 | 0.14    | .003  |
| 2              | Do not receive visitors.                                                                                                   | CBR              | 3773         | 1.01 | 0.10            | 5822         | 1.02 | 0.12    | .009  |
| 3              | Avoid personal contact with postal and delivery workers and have deliveries left outside the house or flat entrance.       | CBR              | 3773         | 1.07 | 0.25            | 5822         | 1.12 | 0.32    | <.001 |
| 4              | Stay apart from other household members in a single room.                                                                  | HBR              | 1184         | 1.06 | 0.24            | 1801         | 1.11 | 0.32    | <.001 |
| 5              | Sleep separately from other household members in a single room.                                                            | HBR              | 1182         | 1.12 | 0.33            | 1792         | 1.20 | 0.40    | <.001 |
| 6              | Have contact with other household members only when you need their help.                                                   | HBR              | 1173         | 1.19 | 0.39            | 1783         | 1.29 | 0.45    | <.001 |
| 7              | Keep at least a 1.5m distance when in contact with other household members.                                                | HBR              | 1154         | 1.11 | 0.32            | 1772         | 1.16 | 0.37    | <.001 |
| 8              | Wear a mouth-nose mask when in contact with other household members.                                                       | HBR              | 1152         | 1.26 | 0.44            | 1767         | 1.37 | 0.48    | <.001 |
| 9              | Take your meals in a different room from other household members.                                                          | HBR              | 1145         | 1.20 | 0.40            | 1750         | 1.29 | 0.46    | <.001 |
| 10             | Use the bathroom, hallway, kitchen and other common areas only when absolutely necessary.                                  | HBR              | 1144         | 1.19 | 0.39            | 1741         | 1.28 | 0.45    | <.001 |
| 11             | Use only one toilet. The rest of the household members should not use this toilet.                                         | HBR              | 604          | 1.20 | 0.40            | 940          | 1.32 | 0.47    | <.001 |
| 12             | The bathroom you use should be cleaned at least once a day.                                                                | HBR              | 1142         | 1.47 | 0.50            | 1742         | 1.57 | 0.50    | <.001 |
| 13             | Surfaces you frequently touch (bedside table, door handles, smartphone, work surfaces, etc.) should be cleaned once a day. | HBR              | 1133         | 1.38 | 0.49            | 1729         | 1.48 | 0.50    | <.001 |
| 14             | Air all rooms regularly.                                                                                                   | HBR              | 1130         | 1.08 | 0.27            | 1729         | 1.10 | 0.30    | .160  |
| 15             | Sneeze into the crook of your elbow or a disposable handkerchief.                                                          | HBR              | 1124         | 1.03 | 0.16            | 1723         | 1.02 | 0.14    | .327  |
| 16             | Wash your hands regularly for at least 20 seconds, especially after blowing your nose or sneezing.                         | HBR              | 1117         | 1.05 | 0.23            | 1715         | 1.05 | 0.21    | .357  |
| 17             | Collect tissues, gloves and other rubbish in a lidded bin in your room.                                                    | HBR              | 1112         | 1.56 | 0.50            | 1707         | 1.61 | 0.49    | .018  |
| 18             | After washing your hands, use paper towels or a towel that only you use, and change it daily.                              | HBR              | 1107         | 1.35 | 0.48            | 1685         | 1.44 | 0.50    | <.001 |
| 19             | Wash your clothes at a minimum of 60 degrees and separately from the laundry of other household members.                   | HBR              | 1107         | 1.63 | 0.48            | 1693         | 1.69 | 0.46    | <.001 |

Table S2: Implementation of isolation/quarantine recommendations. \*(not implemented at all=1; fully implemented=6); CBR=Community based recommendation; HBR= Household based recommendation

| Recommendation |                                                                                                                            | Infected persons |             |      | Contact persons |             |      | p-value |       |
|----------------|----------------------------------------------------------------------------------------------------------------------------|------------------|-------------|------|-----------------|-------------|------|---------|-------|
|                |                                                                                                                            | N                | Mean value* | SD   | N               | Mean value* | SD   |         |       |
| 1              | Do not leave your home.                                                                                                    | CBR              | 3710        | 5.92 | 0.37            | 5656        | 5.78 | 0.65    | <.001 |
| 2              | Do not receive visitors.                                                                                                   | CBR              | 3724        | 5.96 | 0.26            | 5703        | 5.89 | 0.46    | <.001 |
| 3              | Avoid personal contact with postal and delivery workers and have deliveries left outside the house or flat entrance.       | CBR              | 3497        | 5.91 | 0.42            | 5090        | 5.86 | 0.52    | <.001 |
| 4              | Stay apart from other household members in a single room.                                                                  | HBR              | 1105        | 4.85 | 1.47            | 1590        | 4.38 | 1.62    | <.001 |
| 5              | Sleep separately from other household members in a single room.                                                            | HBR              | 1031        | 5.49 | 1.33            | 1418        | 5.00 | 1.82    | <.001 |
| 6              | Have contact with other household members only when you need their help.                                                   | HBR              | 936         | 5.29 | 1.33            | 1261        | 4.95 | 1.55    | <.001 |
| 7              | Keep at least a 1.5m distance when in contact with other household members.                                                | HBR              | 1010        | 5.15 | 1.38            | 1474        | 4.70 | 1.62    | <.001 |
| 8              | Wear a mouth-nose mask when in contact with other household members.                                                       | HBR              | 846         | 5.20 | 1.47            | 1104        | 4.73 | 1.75    | <.001 |
| 9              | Take your meals in a different room from other household members.                                                          | HBR              | 908         | 5.12 | 1.53            | 1230        | 4.56 | 1.86    | <.001 |
| 10             | Use the bathroom, hallway, kitchen and other common areas only when absolutely necessary.                                  | HBR              | 922         | 5.06 | 1.47            | 1239        | 4.55 | 1.77    | <.001 |
| 11             | Use only one toilet. The rest of the household members should not use this toilet.                                         | HBR              | 482         | 5.52 | 1.20            | 633         | 5.37 | 1.37    | .057  |
| 12             | The bathroom you use should be cleaned at least once a day.                                                                | HBR              | 601         | 5.30 | 1.22            | 741         | 5.18 | 1.34    | .065  |
| 13             | Surfaces you frequently touch (bedside table, door handles, smartphone, work surfaces, etc.) should be cleaned once a day. | HBR              | 686         | 5.13 | 1.30            | 902         | 5.00 | 1.37    | .071  |
| 14             | Air all rooms regularly.                                                                                                   | HBR              | 1028        | 5.72 | 0.65            | 1556        | 5.69 | 0.70    | .275  |
| 15             | Sneeze into the crook of your elbow or a disposable handkerchief.                                                          | HBR              | 1080        | 5.91 | 0.40            | 1681        | 5.88 | 0.47    | .13   |
| 16             | Wash your hands regularly for at least 20 seconds, especially after blowing your nose or sneezing.                         | HBR              | 1048        | 5.74 | 0.65            | 1630        | 5.72 | 0.67    | .363  |
| 17             | Collect tissues, gloves and other rubbish in a lidded bin in your room.                                                    | HBR              | 485         | 5.64 | 0.95            | 667         | 5.59 | 1.02    | .455  |
| 18             | After washing your hands, use paper towels or a towel that only you use, and change it daily.                              | HBR              | 715         | 5.66 | 0.83            | 942         | 5.61 | 0.86    | .230  |
| 19             | Wash your clothes at a minimum of 60 degrees and separately from the laundry of other household members.                   | HBR              | 408         | 5.26 | 1.39            | 515         | 5.11 | 1.49    | .118  |

Table S3: Difficulty of isolation/quarantine recommendations. \*(very difficult=1; not difficult at all=6); CBR=Community based recommendation; HBR=Household based recommendation

| Recommendation |                                                                                                                            | Infected persons |             |      | Contact persons |             |      | p-value |       |
|----------------|----------------------------------------------------------------------------------------------------------------------------|------------------|-------------|------|-----------------|-------------|------|---------|-------|
|                |                                                                                                                            | N                | Mean value* | SD   | N               | Mean value* | SD   |         |       |
| 1              | Do not leave your home.                                                                                                    | CBR              | 3722        | 4.24 | 1.74            | 5686        | 3.60 | 1.81    | <.001 |
| 2              | Do not receive visitors.                                                                                                   | CBR              | 3729        | 4.72 | 1.69            | 5713        | 4.23 | 1.84    | <.001 |
| 3              | Avoid personal contact with postal and delivery workers and have deliveries left outside the house or flat entrance.       | CBR              | 3499        | 5.64 | 0.97            | 5089        | 5.54 | 1.13    | <.001 |
| 4              | Stay apart from other household members in a single room.                                                                  | HBR              | 1102        | 2.89 | 1.89            | 1583        | 2.55 | 1.77    | <.001 |
| 5              | Sleep separately from other household members in a single room.                                                            | HBR              | 1026        | 4.24 | 2.09            | 1409        | 3.91 | 2.17    | <.001 |
| 6              | Have contact with other household members only when you need their help.                                                   | HBR              | 938         | 4.02 | 2.00            | 1256        | 3.70 | 2.02    | <.001 |
| 7              | Keep at least a 1.5m distance when in contact with other household members.                                                | HBR              | 1010        | 3.80 | 2.04            | 1467        | 3.35 | 1.97    | <.001 |
| 8              | Wear a mouth-nose mask when in contact with other household members.                                                       | HBR              | 843         | 4.36 | 1.90            | 1091        | 3.91 | 1.97    | <.001 |
| 9              | Take your meals in a different room from other household members.                                                          | HBR              | 904         | 3.90 | 1.99            | 1224        | 3.47 | 2.00    | <.001 |
| 10             | Use the bathroom, hallway, kitchen and other common areas only when absolutely necessary.                                  | HBR              | 919         | 3.93 | 1.96            | 1233        | 3.49 | 1.99    | <.001 |
| 11             | Use only one toilet. The rest of the household members should not use this toilet.                                         | HBR              | 481         | 5.31 | 1.46            | 627         | 5.20 | 1.50    | .259  |
| 12             | The bathroom you use should be cleaned at least once a day.                                                                | HBR              | 596         | 4.85 | 1.61            | 738         | 4.86 | 1.59    | .905  |
| 13             | Surfaces you frequently touch (bedside table, door handles, smartphone, work surfaces, etc.) should be cleaned once a day. | HBR              | 682         | 4.71 | 1.63            | 899         | 4.64 | 1.61    | .353  |
| 14             | Air all rooms regularly.                                                                                                   | HBR              | 1030        | 5.57 | 0.98            | 1553        | 5.54 | 1.00    | .483  |
| 15             | Sneeze into the crook of your elbow or a disposable handkerchief.                                                          | HBR              | 1079        | 5.81 | 0.73            | 1679        | 5.80 | 0.75    | .824  |
| 16             | Wash your hands regularly for at least 20 seconds, especially after blowing your nose or sneezing.                         | HBR              | 1047        | 5.59 | 0.94            | 1631        | 5.64 | 0.86    | .219  |
| 17             | Collect tissues, gloves and other rubbish in a lidded bin in your room.                                                    | HBR              | 480         | 5.56 | 1.01            | 664         | 5.54 | 1.07    | .675  |
| 18             | After washing your hands, use paper towels or a towel that only you use, and change it daily.                              | HBR              | 716         | 5.56 | 1.00            | 940         | 5.54 | 0.97    | .676  |
| 19             | Wash your clothes at a minimum of 60 degrees and separately from the laundry of other household members.                   | HBR              | 401         | 5.12 | 1.52            | 512         | 4.99 | 1.55    | .177  |

Table S4: Views on COVID-19 in relation to quarantine. Hypothetical factors influencing the use of preventive health measures according to the Health Belief Model with statements adapted to the COVID-19 pandemic and isolation/quarantine. Sample size, mean value of agreement and standard deviation (SD) are shown separately for index persons and contact persons. P-value is given for the t-test for independent samples. \* (1  $\triangleq$  I do not agree at all; 6  $\triangleq$  I fully agree); \*\* (1  $\triangleq$  yes; 2  $\triangleq$  no)

| Influencing factor according to the Health Belief Model   | Statement or question adapted to the COVID-19 pandemic and isolation/quarantine                          | Infected persons |            |     | Contact persons |            |     | P-Value |
|-----------------------------------------------------------|----------------------------------------------------------------------------------------------------------|------------------|------------|-----|-----------------|------------|-----|---------|
|                                                           |                                                                                                          | N                | Mean value | SD  | N               | Mean value | SD  |         |
| <b>Perceived Severity/ Perceived Susceptibility</b>       | I think the coronavirus is dangerous.                                                                    | 3750             | 5.4*       | 1.1 | 5784            | 5.5*       | 0.9 | <.001   |
| <b>Perceived Benefits</b>                                 | When I isolate/quarantine myself, I am protecting myself.                                                | 3685             | 3.7*       | 2.1 | 5730            | 3.9*       | 2.0 | .008    |
|                                                           | When I isolate/ quarantine myself, I am protecting other members of my household.                        | 3712             | 4.6*       | 1.8 | 5725            | 4.4*       | 1.9 | <.001   |
|                                                           | When I isolate/ quarantine myself, I am protecting our society from a further spread of the coronavirus. | 3748             | 5.8*       | 0.7 | 5790            | 5.8*       | 0.7 | <.001   |
| <b>Perceived Barriers</b>                                 | I experienced difficulties in obtaining everyday necessities during isolation/quarantine                 | 3748             | 2.4*       | 1.7 | 5781            | 2.3*       | 1.7 | .061    |
|                                                           | I suffered financial losses due to the isolation/quarantine (yes/no)                                     | 3239             | 1.8**      | 0.4 | 4956            | 1.8**      | 0.4 | .271    |
| <b>Expected Result</b>                                    | I think the isolation/ quarantine measures are too strict.                                               | 3724             | 2.2*       | 1.7 | 5757            | 2.5*       | 1.7 | <.001   |
|                                                           | I think the quarantine measures are too lax.                                                             | 3696             | 2.4*       | 1.7 | 5697            | 2.4*       | 1.6 | .200    |
| <b>Psychological characteristics/ Peer group pressure</b> | People in my professional and social environment have expected me to implement the quarantine measures.  | 3706             | 5.5*       | 1.2 | 5732            | 5.3*       | 1.3 | <.001   |
| <b>Health Knowledge/ Cue to action</b>                    | I have been given clear information about the reason for the isolation/quarantine.                       | 3742             | 5.3*       | 1.3 | 5786            | 4.8*       | 1.7 | <.001   |
|                                                           | It was explained to me in an understandable way how to behave in isolation/quarantine.                   | 3746             | 5.1*       | 1.4 | 5774            | 4.7*       | 1.7 | <.001   |



Table S5: Distribution of the baseline adherence score

| Baseline adherence score (points) | Infected persons |      | Contact persons |      | Total |      |
|-----------------------------------|------------------|------|-----------------|------|-------|------|
|                                   | N                | %    | N               | %    | N     | %    |
| <b>0</b>                          | 17               | 0.5  | 51              | 0.9  | 68    | 0.7  |
| <b>&gt;0-3</b>                    | 3                | 0.1  | 10              | 0.2  | 13    | 0.1  |
| <b>&gt;3-6</b>                    | 24               | 0.6  | 89              | 1.5  | 113   | 1.2  |
| <b>&gt;6-9</b>                    | 45               | 1.2  | 214             | 3.7  | 259   | 2.7  |
| <b>&gt;9-11</b>                   | 295              | 7.8  | 688             | 11.8 | 983   | 10.2 |
| <b>&gt;11-14</b>                  | 371              | 9.8  | 993             | 17.1 | 1364  | 14.2 |
| <b>15</b>                         | 3018             | 80.0 | 3777            | 64.9 | 6795  | 70.8 |

Table S6: Distribution of the household adherence score

| Household adherence score (points) | Infected persons |      | Contact persons |      | Total |      |
|------------------------------------|------------------|------|-----------------|------|-------|------|
|                                    | N                | %    | N               | %    | N     | %    |
| <b>0</b>                           | 25               | 2.1  | 42              | 2.3  | 67    | 2.2  |
| <b>&gt;0-5</b>                     | 52               | 4.3  | 105             | 5.8  | 157   | 5.2  |
| <b>&gt;5-10</b>                    | 119              | 9.9  | 253             | 13.9 | 372   | 12.4 |
| <b>&gt;10-15</b>                   | 191              | 16.0 | 373             | 20.6 | 564   | 18.7 |
| <b>&gt;15-20</b>                   | 259              | 21.6 | 419             | 23.1 | 678   | 22.5 |
| <b>&gt;20-24</b>                   | 278              | 23.2 | 348             | 19.2 | 626   | 20.8 |
| <b>25</b>                          | 273              | 22.8 | 274             | 15.1 | 547   | 18.2 |

Table S7: Factors influencing the baseline and household adherence score. Baseline models of linear backward regression analyses \*(disagree=1; agree=2)

| Baseline models                                                                                           | Non-Standardised Coefficients |            | Standardised Coefficients |       | 95% Confidence Interval |             |
|-----------------------------------------------------------------------------------------------------------|-------------------------------|------------|---------------------------|-------|-------------------------|-------------|
|                                                                                                           | Regression Coefficient (B)    | Std. Error | Beta                      | Sig.  | Lower Limit             | Upper Limit |
| <b>Baseline adherence score</b>                                                                           |                               |            |                           |       |                         |             |
| Infected persons (1) vs. Contact persons (2)                                                              | -0.030                        | 0.003      | -0.102                    | <.001 | -0.037                  | -0.024      |
| Age (years)                                                                                               | 0.001                         | 0.000      | 0.055                     | <.001 | <0.001                  | 0.001       |
| Gender (female=1; male=2)                                                                                 | -0.001                        | 0.003      | -0.002                    | .860  | -0.007                  | 0.006       |
| Migration background (no= 1; yes=2)                                                                       | 0.012                         | 0.008      | 0.017                     | .133  | -0.004                  | 0.027       |
| Socioeconomic status (SES) (high=1; middle and low=2)                                                     | -0.007                        | 0.004      | -0.018                    | .116  | -0.016                  | 0.002       |
| Comorbidity (yes=1; no=2)                                                                                 | 0.002                         | 0.004      | 0.004                     | .708  | -0.007                  | 0.010       |
| Married/ living in a Relationship (no=1; yes=2)                                                           | -0.001                        | 0.004      | -0.003                    | .791  | -0.009                  | 0.007       |
| Having Children (yes=1; no=2)                                                                             | -0.010                        | 0.004      | -0.033                    | .023  | -0.018                  | -0.001      |
| Access to balcony or garden (yes=0; no=1)                                                                 | -0.002                        | 0.005      | -0.006                    | .640  | -0.012                  | 0.007       |
| I think the coronavirus is dangerous. *                                                                   | 0.011                         | 0.008      | 0.017                     | .175  | -0.005                  | 0.027       |
| When I isolate/quarantine myself, I am protecting myself. *                                               | 0.004                         | 0.004      | 0.013                     | .268  | -0.003                  | 0.011       |
| When I isolate/ quarantine myself, I am protecting other members of my household. *                       | 0.012                         | 0.004      | 0.038                     | .002  | 0.005                   | 0.020       |
| When I isolate/ quarantine myself, I am protecting our society from a further spread of the coronavirus.* | 0.044                         | 0.013      | 0.041                     | .001  | 0.019                   | 0.070       |
| I experienced difficulties in obtaining everyday necessities during isolation/quarantine *                | -0.015                        | 0.004      | -0.044                    | <.001 | -0.023                  | -0.007      |
| I suffered financial losses due to the isolation/quarantine (yes=1; no=2)                                 | -0.005                        | 0.004      | -0.012                    | .294  | -0.013                  | 0.004       |
| I think the isolation/ quarantine measures are too strict. *                                              | -0.016                        | 0.004      | -0.048                    | <.001 | -0.024                  | -0.008      |
| I think the isolation/ quarantine measures are too lax. *                                                 | -0.012                        | 0.004      | -0.037                    | .002  | -0.020                  | -0.005      |
| People in my professional and social environment have expected me to implement the quarantine measures. * | 0.037                         | 0.006      | 0.070                     | <.001 | 0.025                   | 0.049       |
| I have been given clear information about the reason for the isolation/quarantine. *                      | 0.007                         | 0.006      | 0.017                     | .244  | -0.005                  | 0.018       |
| It was explained to me in an understandable way how to behave in quarantine. *                            | 0.047                         | 0.006      | 0.125                     | <.001 | 0.036                   | 0.058       |
| <b>Household adherence score</b>                                                                          |                               |            |                           |       |                         |             |
| Infected persons (1) vs. Contact persons (2)                                                              | -0.052                        | 0.010      | -0.102                    | <.001 | -0.072                  | -0.032      |
| Age (years)                                                                                               | 0.002                         | 0.001      | 0.104                     | <.001 | 0.001                   | 0.003       |
| Sex (female=1; male=2)                                                                                    | 0.023                         | 0.010      | 0.046                     | .023  | 0.003                   | 0.043       |
| Migration background (no= 1; yes=2)                                                                       | 0.067                         | 0.022      | 0.060                     | .003  | 0.023                   | 0.110       |

1  
2  
3  
4  
5  
6  
7  
8  
9  
10  
11  
12  
13  
14  
15  
16  
17  
18  
19  
20  
21  
22  
23  
24  
25  
26  
27  
28  
29  
30  
31  
32  
33  
34  
35  
36  
37  
38  
39  
40  
41  
42  
43  
44  
45  
46

|                                                                                                           |        |       |        |       |        |        |
|-----------------------------------------------------------------------------------------------------------|--------|-------|--------|-------|--------|--------|
| Socioeconomic status (SES) (high=1; middle and low=2)                                                     | -0.028 | 0.012 | -0.045 | .024  | -0.053 | -0.004 |
| Comorbidity (yes=1; no=2)                                                                                 | -0.006 | 0.012 | -0.010 | .608  | -0.030 | 0.018  |
| Married/ living in a Relationship (no=1; yes=2)                                                           | 0.064  | 0.014 | 0.101  | <.001 | 0.036  | 0.091  |
| Having Children (yes=1; no=2)                                                                             | -0.029 | 0.013 | -0.058 | .029  | -0.054 | -0.003 |
| Access to balcony or garden (yes=0; no=1)                                                                 | -0.015 | 0.017 | -0.017 | .391  | -0.048 | 0.019  |
| I think the coronavirus is dangerous. *                                                                   | 0.055  | 0.023 | 0.049  | .019  | 0.009  | 0.101  |
| When I isolate/quarantine myself, I am protecting myself. *                                               | 0.008  | 0.010 | 0.015  | .455  | -0.012 | 0.028  |
| When I isolate/ quarantine myself, I am protecting other members of my household. *                       | 0.142  | 0.013 | 0.236  | <.001 | 0.117  | 0.167  |
| When I isolate/ quarantine myself, I am protecting our society from a further spread of the coronavirus.* | 0.069  | 0.042 | 0.034  | .099  | -0.013 | 0.150  |
| I experienced difficulties in obtaining everyday necessities during isolation/quarantine *                | -0.004 | 0.012 | -0.006 | .766  | -0.028 | 0.021  |
| I suffered financial losses due to the isolation/quarantine (yes=1; no=2)                                 | -0.025 | 0.013 | -0.040 | .049  | -0.049 | <0.001 |
| I think the isolation/ quarantine measures are too strict. *                                              | -0.015 | 0.012 | -0.026 | .201  | -0.038 | 0.008  |
| I think the isolation/ quarantine measures are too lax. *                                                 | -0.012 | 0.011 | -0.022 | .276  | -0.035 | 0.010  |
| People in my professional and social environment have expected me to implement the quarantine measures. * | 0.007  | 0.019 | 0.007  | .729  | -0.031 | 0.045  |
| I have been given clear information about the reason for the isolation/quarantine. *                      | 0.040  | 0.017 | 0.057  | .019  | 0.007  | 0.074  |
| It was explained to me in an understandable way how to behave in quarantine. *                            | 0.032  | 0.016 | 0.048  | .047  | 0.000  | 0.064  |

STROBE Statement—Checklist of items that should be included in reports of *cross-sectional studies*

|                              | Item No | Recommendation                                                                                                                                                                                    | Page No           |
|------------------------------|---------|---------------------------------------------------------------------------------------------------------------------------------------------------------------------------------------------------|-------------------|
| <b>Title and abstract</b>    | 1       | (a) Indicate the study's design with a commonly used term in the title or the abstract                                                                                                            | 1,2               |
|                              |         | (b) Provide in the abstract an informative and balanced summary of what was done and what was found                                                                                               | 2                 |
| <b>Introduction</b>          |         |                                                                                                                                                                                                   |                   |
| Background/rationale         | 2       | Explain the scientific background and rationale for the investigation being reported                                                                                                              | 3-4               |
| Objectives                   | 3       | State specific objectives, including any prespecified hypotheses                                                                                                                                  | 3-4               |
| <b>Methods</b>               |         |                                                                                                                                                                                                   |                   |
| Study design                 | 4       | Present key elements of study design early in the paper                                                                                                                                           | 4-5               |
| Setting                      | 5       | Describe the setting, locations, and relevant dates, including periods of recruitment, exposure, follow-up, and data collection                                                                   | 4-5               |
| Participants                 | 6       | (a) Give the eligibility criteria, and the sources and methods of selection of participants                                                                                                       | 4-5               |
| Variables                    | 7       | Clearly define all outcomes, exposures, predictors, potential confounders, and effect modifiers. Give diagnostic criteria, if applicable                                                          | 4-8               |
| Data sources/<br>measurement | 8*      | For each variable of interest, give sources of data and details of methods of assessment (measurement). Describe comparability of assessment methods if there is more than one group              | 4-8               |
| Bias                         | 9       | Describe any efforts to address potential sources of bias                                                                                                                                         | 4-8               |
| Study size                   | 10      | Explain how the study size was arrived at                                                                                                                                                         | (Fig. 1)          |
| Quantitative variables       | 11      | Explain how quantitative variables were handled in the analyses. If applicable, describe which groupings were chosen and why                                                                      | 4-8               |
| Statistical methods          | 12      | (a) Describe all statistical methods, including those used to control for confounding                                                                                                             | 8                 |
|                              |         | (b) Describe any methods used to examine subgroups and interactions                                                                                                                               | 8                 |
|                              |         | (c) Explain how missing data were addressed                                                                                                                                                       | 8                 |
|                              |         | (d) If applicable, describe analytical methods taking account of sampling strategy                                                                                                                | 8                 |
|                              |         | (e) Describe any sensitivity analyses                                                                                                                                                             | 8                 |
| <b>Results</b>               |         |                                                                                                                                                                                                   |                   |
| Participants                 | 13*     | (a) Report numbers of individuals at each stage of study—eg numbers potentially eligible, examined for eligibility, confirmed eligible, included in the study, completing follow-up, and analysed | (Fig.1)           |
|                              |         | (b) Give reasons for non-participation at each stage                                                                                                                                              | (Fig.1)           |
|                              |         | (c) Consider use of a flow diagram                                                                                                                                                                | Fig. 1            |
| Descriptive data             | 14*     | (a) Give characteristics of study participants (eg demographic, clinical, social) and information on exposures and potential confounders                                                          | (Tab. 2)          |
|                              |         | (b) Indicate number of participants with missing data for each variable of interest                                                                                                               | 9, Fig. 1, Tab. 2 |
| Outcome data                 | 15*     | Report numbers of outcome events or summary measures                                                                                                                                              | 8-13              |

|    |                          |    |                                                                                                                                                                                                              |
|----|--------------------------|----|--------------------------------------------------------------------------------------------------------------------------------------------------------------------------------------------------------------|
| 1  |                          |    |                                                                                                                                                                                                              |
| 2  | Main results             | 16 | (a) Give unadjusted estimates and, if applicable, confounder-adjusted estimates and their precision (eg, 95% confidence interval). Make clear which confounders were adjusted for and why they were included |
| 3  |                          |    | 8-13                                                                                                                                                                                                         |
| 4  |                          |    |                                                                                                                                                                                                              |
| 5  |                          |    |                                                                                                                                                                                                              |
| 6  |                          |    |                                                                                                                                                                                                              |
| 7  |                          |    |                                                                                                                                                                                                              |
| 8  |                          |    | (b) Report category boundaries when continuous variables were categorized                                                                                                                                    |
| 9  |                          |    | not applicable                                                                                                                                                                                               |
| 10 |                          |    |                                                                                                                                                                                                              |
| 11 |                          |    | (c) If relevant, consider translating estimates of relative risk into absolute risk for a meaningful time period                                                                                             |
| 12 |                          |    | not applicable                                                                                                                                                                                               |
| 13 | Other analyses           | 17 | Report other analyses done—eg analyses of subgroups and interactions, and sensitivity analyses                                                                                                               |
| 14 |                          |    | 8-13                                                                                                                                                                                                         |
| 15 | <b>Discussion</b>        |    |                                                                                                                                                                                                              |
| 16 | Key results              | 18 | Summarise key results with reference to study objectives                                                                                                                                                     |
| 17 |                          |    | 2-4, 13-16                                                                                                                                                                                                   |
| 18 | Limitations              | 19 | Discuss limitations of the study, taking into account sources of potential bias or imprecision. Discuss both direction and magnitude of any potential bias                                                   |
| 19 |                          |    | 15                                                                                                                                                                                                           |
| 20 |                          |    |                                                                                                                                                                                                              |
| 21 | Interpretation           | 20 | Give a cautious overall interpretation of results considering objectives, limitations, multiplicity of analyses, results from similar studies, and other relevant evidence                                   |
| 22 |                          |    | 13-16                                                                                                                                                                                                        |
| 23 |                          |    |                                                                                                                                                                                                              |
| 24 |                          |    |                                                                                                                                                                                                              |
| 25 | Generalisability         | 21 | Discuss the generalisability (external validity) of the study results                                                                                                                                        |
| 26 |                          |    | 13-16                                                                                                                                                                                                        |
| 27 | <b>Other information</b> |    |                                                                                                                                                                                                              |
| 28 | Funding                  | 22 | Give the source of funding and the role of the funders for the present study and, if applicable, for the original study on which the present article is based                                                |
| 29 |                          |    | 16                                                                                                                                                                                                           |
| 30 |                          |    |                                                                                                                                                                                                              |
| 31 |                          |    |                                                                                                                                                                                                              |
| 32 |                          |    |                                                                                                                                                                                                              |

\*Give information separately for exposed and unexposed groups.

**Note:** An Explanation and Elaboration article discusses each checklist item and gives methodological background and published examples of transparent reporting. The STROBE checklist is best used in conjunction with this article (freely available on the Web sites of PLoS Medicine at <http://www.plosmedicine.org/>, Annals of Internal Medicine at <http://www.annals.org/>, and Epidemiology at <http://www.epidem.com/>). Information on the STROBE Initiative is available at [www.strobe-statement.org](http://www.strobe-statement.org).
