# Supplementary material for: Adherence to stay-at-home orders: awareness, implementation and difficulties of officially ordered quarantine measures in the context of the COVID-19 pandemic in Cologne – a retrospective cohort study
Source: PubMed Central journal article supplement — BMJ Open. 2022 Nov 2;12(11):e063358. doi: 10.1136/bmjopen-2022-063358 (PMC9638749; doi:10.1136/bmjopen-2022-063358), 2022-11-02
Supplement: bmjopen-2022-063358supp001.pdf [file bmjopen-2022-063358supp001.pdf]

**SUPPLEMENTARY MATERIAL****Adherence to stay-at-home orders: awareness, implementation and difficulties of the officially ordered quarantine measures in the context of the COVID-19 pandemic in Cologne - a retrospective cohort study**

---

| <b>Table of contents</b> |                                                                                                                        |        |
|--------------------------|------------------------------------------------------------------------------------------------------------------------|--------|
| <b>Table S1</b>          | Awareness of isolation/quarantine recommendations                                                                      | Page 2 |
| <b>Table S2</b>          | Implementation of isolation/quarantine recommendations                                                                 | Page 3 |
| <b>Table S3</b>          | Difficulty of isolation/quarantine recommendations                                                                     | Page 4 |
| <b>Table S4</b>          | Views on COVID-19 in relation to quarantine                                                                            | Page 5 |
| <b>Table S5</b>          | Distribution of the baseline adherence score                                                                           | Page 6 |
| <b>Table S6</b>          | Distribution of the household adherence score                                                                          | Page 6 |
| <b>Table S7</b>          | Factors influencing the baseline and household adherence score; Baseline models of linear backward regression analyses | Page 7 |

---

Table S1: Awareness of isolation/quarantine recommendations. \*(yes=1; no=2); CBR=Community based recommendation; HBR= Household based recommendation

| Recommendation |                                                                                                                            | Infected persons |              |      | Contact persons |              |      | p-value |       |
|----------------|----------------------------------------------------------------------------------------------------------------------------|------------------|--------------|------|-----------------|--------------|------|---------|-------|
|                |                                                                                                                            | N                | Mean value * | SD   | N               | Mean value * | SD   |         |       |
| 1              | Do not leave your home.                                                                                                    | CBR              | 3773         | 1.01 | 0.11            | 5822         | 1.02 | 0.14    | .003  |
| 2              | Do not receive visitors.                                                                                                   | CBR              | 3773         | 1.01 | 0.10            | 5822         | 1.02 | 0.12    | .009  |
| 3              | Avoid personal contact with postal and delivery workers and have deliveries left outside the house or flat entrance.       | CBR              | 3773         | 1.07 | 0.25            | 5822         | 1.12 | 0.32    | <.001 |
| 4              | Stay apart from other household members in a single room.                                                                  | HBR              | 1184         | 1.06 | 0.24            | 1801         | 1.11 | 0.32    | <.001 |
| 5              | Sleep separately from other household members in a single room.                                                            | HBR              | 1182         | 1.12 | 0.33            | 1792         | 1.20 | 0.40    | <.001 |
| 6              | Have contact with other household members only when you need their help.                                                   | HBR              | 1173         | 1.19 | 0.39            | 1783         | 1.29 | 0.45    | <.001 |
| 7              | Keep at least a 1.5m distance when in contact with other household members.                                                | HBR              | 1154         | 1.11 | 0.32            | 1772         | 1.16 | 0.37    | <.001 |
| 8              | Wear a mouth-nose mask when in contact with other household members.                                                       | HBR              | 1152         | 1.26 | 0.44            | 1767         | 1.37 | 0.48    | <.001 |
| 9              | Take your meals in a different room from other household members.                                                          | HBR              | 1145         | 1.20 | 0.40            | 1750         | 1.29 | 0.46    | <.001 |
| 10             | Use the bathroom, hallway, kitchen and other common areas only when absolutely necessary.                                  | HBR              | 1144         | 1.19 | 0.39            | 1741         | 1.28 | 0.45    | <.001 |
| 11             | Use only one toilet. The rest of the household members should not use this toilet.                                         | HBR              | 604          | 1.20 | 0.40            | 940          | 1.32 | 0.47    | <.001 |
| 12             | The bathroom you use should be cleaned at least once a day.                                                                | HBR              | 1142         | 1.47 | 0.50            | 1742         | 1.57 | 0.50    | <.001 |
| 13             | Surfaces you frequently touch (bedside table, door handles, smartphone, work surfaces, etc.) should be cleaned once a day. | HBR              | 1133         | 1.38 | 0.49            | 1729         | 1.48 | 0.50    | <.001 |
| 14             | Air all rooms regularly.                                                                                                   | HBR              | 1130         | 1.08 | 0.27            | 1729         | 1.10 | 0.30    | .160  |
| 15             | Sneeze into the crook of your elbow or a disposable handkerchief.                                                          | HBR              | 1124         | 1.03 | 0.16            | 1723         | 1.02 | 0.14    | .327  |
| 16             | Wash your hands regularly for at least 20 seconds, especially after blowing your nose or sneezing.                         | HBR              | 1117         | 1.05 | 0.23            | 1715         | 1.05 | 0.21    | .357  |
| 17             | Collect tissues, gloves and other rubbish in a lidded bin in your room.                                                    | HBR              | 1112         | 1.56 | 0.50            | 1707         | 1.61 | 0.49    | .018  |
| 18             | After washing your hands, use paper towels or a towel that only you use, and change it daily.                              | HBR              | 1107         | 1.35 | 0.48            | 1685         | 1.44 | 0.50    | <.001 |
| 19             | Wash your clothes at a minimum of 60 degrees and separately from the laundry of other household members.                   | HBR              | 1107         | 1.63 | 0.48            | 1693         | 1.69 | 0.46    | <.001 |

Table S2: Implementation of isolation/quarantine recommendations. \*(not implemented at all=1; fully implemented=6); CBR=Community based recommendation; HBR= Household based recommendation

| Recommendation |                                                                                                                            | Infected persons |             |      | Contact persons |             |      | P-value |       |
|----------------|----------------------------------------------------------------------------------------------------------------------------|------------------|-------------|------|-----------------|-------------|------|---------|-------|
|                |                                                                                                                            | N                | Mean value* | SD   | N               | Mean value* | SD   |         |       |
| 1              | Do not leave your home.                                                                                                    | CBR              | 3710        | 5.92 | 0.37            | 5656        | 5.78 | 0.65    | <.001 |
| 2              | Do not receive visitors.                                                                                                   | CBR              | 3724        | 5.96 | 0.26            | 5703        | 5.89 | 0.46    | <.001 |
| 3              | Avoid personal contact with postal and delivery workers and have deliveries left outside the house or flat entrance.       | CBR              | 3497        | 5.91 | 0.42            | 5090        | 5.86 | 0.52    | <.001 |
| 4              | Stay apart from other household members in a single room.                                                                  | HBR              | 1105        | 4.85 | 1.47            | 1590        | 4.38 | 1.62    | <.001 |
| 5              | Sleep separately from other household members in a single room.                                                            | HBR              | 1031        | 5.49 | 1.33            | 1418        | 5.00 | 1.82    | <.001 |
| 6              | Have contact with other household members only when you need their help.                                                   | HBR              | 936         | 5.29 | 1.33            | 1261        | 4.95 | 1.55    | <.001 |
| 7              | Keep at least a 1.5m distance when in contact with other household members.                                                | HBR              | 1010        | 5.15 | 1.38            | 1474        | 4.70 | 1.62    | <.001 |
| 8              | Wear a mouth-nose mask when in contact with other household members.                                                       | HBR              | 846         | 5.20 | 1.47            | 1104        | 4.73 | 1.75    | <.001 |
| 9              | Take your meals in a different room from other household members.                                                          | HBR              | 908         | 5.12 | 1.53            | 1230        | 4.56 | 1.86    | <.001 |
| 10             | Use the bathroom, hallway, kitchen and other common areas only when absolutely necessary.                                  | HBR              | 922         | 5.06 | 1.47            | 1239        | 4.55 | 1.77    | <.001 |
| 11             | Use only one toilet. The rest of the household members should not use this toilet.                                         | HBR              | 482         | 5.52 | 1.20            | 633         | 5.37 | 1.37    | .057  |
| 12             | The bathroom you use should be cleaned at least once a day.                                                                | HBR              | 601         | 5.30 | 1.22            | 741         | 5.18 | 1.34    | .065  |
| 13             | Surfaces you frequently touch (bedside table, door handles, smartphone, work surfaces, etc.) should be cleaned once a day. | HBR              | 686         | 5.13 | 1.30            | 902         | 5.00 | 1.37    | .071  |
| 14             | Air all rooms regularly.                                                                                                   | HBR              | 1028        | 5.72 | 0.65            | 1556        | 5.69 | 0.70    | .275  |
| 15             | Sneeze into the crook of your elbow or a disposable handkerchief.                                                          | HBR              | 1080        | 5.91 | 0.40            | 1681        | 5.88 | 0.47    | .13   |
| 16             | Wash your hands regularly for at least 20 seconds, especially after blowing your nose or sneezing.                         | HBR              | 1048        | 5.74 | 0.65            | 1630        | 5.72 | 0.67    | .363  |
| 17             | Collect tissues, gloves and other rubbish in a lidded bin in your room.                                                    | HBR              | 485         | 5.64 | 0.95            | 667         | 5.59 | 1.02    | .455  |
| 18             | After washing your hands, use paper towels or a towel that only you use, and change it daily.                              | HBR              | 715         | 5.66 | 0.83            | 942         | 5.61 | 0.86    | .230  |
| 19             | Wash your clothes at a minimum of 60 degrees and separately from the laundry of other household members.                   | HBR              | 408         | 5.26 | 1.39            | 515         | 5.11 | 1.49    | .118  |

Table S3: Difficulty of isolation/quarantine recommendations. \*(very difficult=1; not difficult at all=6); CBR=Community based recommendation; HBR=Household based recommendation

| Recommendation |                                                                                                                            | Infected persons |              |      | Contact persons |              |      | P-value |       |
|----------------|----------------------------------------------------------------------------------------------------------------------------|------------------|--------------|------|-----------------|--------------|------|---------|-------|
|                |                                                                                                                            | N                | Mean value * | SD   | N               | Mean value * | SD   |         |       |
| 1              | Do not leave your home.                                                                                                    | CBR              | 3722         | 4.24 | 1.74            | 5686         | 3.60 | 1.81    | <.001 |
| 2              | Do not receive visitors.                                                                                                   | CBR              | 3729         | 4.72 | 1.69            | 5713         | 4.23 | 1.84    | <.001 |
| 3              | Avoid personal contact with postal and delivery workers and have deliveries left outside the house or flat entrance.       | CBR              | 3499         | 5.64 | 0.97            | 5089         | 5.54 | 1.13    | <.001 |
| 4              | Stay apart from other household members in a single room.                                                                  | HBR              | 1102         | 2.89 | 1.89            | 1583         | 2.55 | 1.77    | <.001 |
| 5              | Sleep separately from other household members in a single room.                                                            | HBR              | 1026         | 4.24 | 2.09            | 1409         | 3.91 | 2.17    | <.001 |
| 6              | Have contact with other household members only when you need their help.                                                   | HBR              | 938          | 4.02 | 2.00            | 1256         | 3.70 | 2.02    | <.001 |
| 7              | Keep at least a 1.5m distance when in contact with other household members.                                                | HBR              | 1010         | 3.80 | 2.04            | 1467         | 3.35 | 1.97    | <.001 |
| 8              | Wear a mouth-nose mask when in contact with other household members.                                                       | HBR              | 843          | 4.36 | 1.90            | 1091         | 3.91 | 1.97    | <.001 |
| 9              | Take your meals in a different room from other household members.                                                          | HBR              | 904          | 3.90 | 1.99            | 1224         | 3.47 | 2.00    | <.001 |
| 10             | Use the bathroom, hallway, kitchen and other common areas only when absolutely necessary.                                  | HBR              | 919          | 3.93 | 1.96            | 1233         | 3.49 | 1.99    | <.001 |
| 11             | Use only one toilet. The rest of the household members should not use this toilet.                                         | HBR              | 481          | 5.31 | 1.46            | 627          | 5.20 | 1.50    | .259  |
| 12             | The bathroom you use should be cleaned at least once a day.                                                                | HBR              | 596          | 4.85 | 1.61            | 738          | 4.86 | 1.59    | .905  |
| 13             | Surfaces you frequently touch (bedside table, door handles, smartphone, work surfaces, etc.) should be cleaned once a day. | HBR              | 682          | 4.71 | 1.63            | 899          | 4.64 | 1.61    | .353  |
| 14             | Air all rooms regularly.                                                                                                   | HBR              | 1030         | 5.57 | 0.98            | 1553         | 5.54 | 1.00    | .483  |
| 15             | Sneeze into the crook of your elbow or a disposable handkerchief.                                                          | HBR              | 1079         | 5.81 | 0.73            | 1679         | 5.80 | 0.75    | .824  |
| 16             | Wash your hands regularly for at least 20 seconds, especially after blowing your nose or sneezing.                         | HBR              | 1047         | 5.59 | 0.94            | 1631         | 5.64 | 0.86    | .219  |
| 17             | Collect tissues, gloves and other rubbish in a lidded bin in your room.                                                    | HBR              | 480          | 5.56 | 1.01            | 664          | 5.54 | 1.07    | .675  |
| 18             | After washing your hands, use paper towels or a towel that only you use, and change it daily.                              | HBR              | 716          | 5.56 | 1.00            | 940          | 5.54 | 0.97    | .676  |
| 19             | Wash your clothes at a minimum of 60 degrees and separately from the laundry of other household members.                   | HBR              | 401          | 5.12 | 1.52            | 512          | 4.99 | 1.55    | .177  |

Table S4: Views on COVID-19 in relation to quarantine. Hypothetical factors influencing the use of preventive health measures according to the Health Belief Model with statements adapted to the COVID-19 pandemic and isolation/quarantine. Sample size, mean value of agreement and standard deviation (SD) are shown separately for index persons and contact persons. P-value is given for the t-test for independent samples. \* (1  $\triangleq$  I do not agree at all; 6  $\triangleq$  I fully agree); \*\* (1  $\triangleq$  yes; 2  $\triangleq$  no)

| Influencing factor according to the Health Belief Model   | Statement or question adapted to the COVID-19 pandemic and isolation/quarantine                          | Infected persons |            |     | Contact persons |            |     | P-Value |
|-----------------------------------------------------------|----------------------------------------------------------------------------------------------------------|------------------|------------|-----|-----------------|------------|-----|---------|
|                                                           |                                                                                                          | N                | Mean value | SD  | N               | Mean value | SD  |         |
| <b>Perceived Severity/ Perceived Susceptibility</b>       | I think the coronavirus is dangerous.                                                                    | 3750             | 5.4*       | 1.1 | 5784            | 5.5*       | 0.9 | <.001   |
| <b>Perceived Benefits</b>                                 | When I isolate/quarantine myself, I am protecting myself.                                                | 3685             | 3.7*       | 2.1 | 5730            | 3.9*       | 2.0 | .008    |
|                                                           | When I isolate/ quarantine myself, I am protecting other members of my household.                        | 3712             | 4.6*       | 1.8 | 5725            | 4.4*       | 1.9 | <.001   |
|                                                           | When I isolate/ quarantine myself, I am protecting our society from a further spread of the coronavirus. | 3748             | 5.8*       | 0.7 | 5790            | 5.8*       | 0.7 | <.001   |
| <b>Perceived Barriers</b>                                 | I experienced difficulties in obtaining everyday necessities during isolation/quarantine                 | 3748             | 2.4*       | 1.7 | 5781            | 2.3*       | 1.7 | .061    |
|                                                           | I suffered financial losses due to the isolation/quarantine (yes/no)                                     | 3239             | 1.8**      | 0.4 | 4956            | 1.8**      | 0.4 | .271    |
| <b>Expected Result</b>                                    | I think the isolation/ quarantine measures are too strict.                                               | 3724             | 2.2*       | 1.7 | 5757            | 2.5*       | 1.7 | <.001   |
|                                                           | I think the quarantine measures are too lax.                                                             | 3696             | 2.4*       | 1.7 | 5697            | 2.4*       | 1.6 | .200    |
| <b>Psychological characteristics/ Peer group pressure</b> | People in my professional and social environment have expected me to implement the quarantine measures.  | 3706             | 5.5*       | 1.2 | 5732            | 5.3*       | 1.3 | <.001   |
| <b>Health Knowledge/ Cue to action</b>                    | I have been given clear information about the reason for the isolation/quarantine.                       | 3742             | 5.3*       | 1.3 | 5786            | 4.8*       | 1.7 | <.001   |
|                                                           | It was explained to me in an understandable way how to behave in isolation/quarantine.                   | 3746             | 5.1*       | 1.4 | 5774            | 4.7*       | 1.7 | <.001   |

Table S5: Distribution of the baseline adherence score

| Baseline adherence score (points) | Infected persons |      | Contact persons |      | Total |      |
|-----------------------------------|------------------|------|-----------------|------|-------|------|
|                                   | N                | %    | N               | %    | N     | %    |
| 0                                 | 17               | 0.5  | 51              | 0.9  | 68    | 0.7  |
| >0-3                              | 3                | 0.1  | 10              | 0.2  | 13    | 0.1  |
| >3-6                              | 24               | 0.6  | 89              | 1.5  | 113   | 1.2  |
| >6-9                              | 45               | 1.2  | 214             | 3.7  | 259   | 2.7  |
| >9-11                             | 295              | 7.8  | 688             | 11.8 | 983   | 10.2 |
| >11-14                            | 371              | 9.8  | 993             | 17.1 | 1364  | 14.2 |
| 15                                | 3018             | 80.0 | 3777            | 64.9 | 6795  | 70.8 |

Table S6: Distribution of the household adherence score

| Household adherence score (points) | Infected persons |      | Contact persons |      | Total |      |
|------------------------------------|------------------|------|-----------------|------|-------|------|
|                                    | N                | %    | N               | %    | N     | %    |
| 0                                  | 25               | 2.1  | 42              | 2.3  | 67    | 2.2  |
| >0-5                               | 52               | 4.3  | 105             | 5.8  | 157   | 5.2  |
| >5-10                              | 119              | 9.9  | 253             | 13.9 | 372   | 12.4 |
| >10-15                             | 191              | 16.0 | 373             | 20.6 | 564   | 18.7 |
| >15-20                             | 259              | 21.6 | 419             | 23.1 | 678   | 22.5 |
| >20-24                             | 278              | 23.2 | 348             | 19.2 | 626   | 20.8 |
| 25                                 | 273              | 22.8 | 274             | 15.1 | 547   | 18.2 |

Table S7: Factors influencing the baseline and household adherence score. Baseline models of linear backward regression analyses \*(disagree=1; agree=2)

| Baseline models                                                                                           | Non-Standardised Coefficients |            | Standardised Coefficients |       | 95% Confidence Interval |             |
|-----------------------------------------------------------------------------------------------------------|-------------------------------|------------|---------------------------|-------|-------------------------|-------------|
|                                                                                                           | Regression Coefficient (B)    | Std. Error | Beta                      | Sig.  | Lower Limit             | Upper Limit |
| <b>Baseline adherence score</b>                                                                           |                               |            |                           |       |                         |             |
| Infected persons (1) vs. Contact persons (2)                                                              | -0.030                        | 0.003      | -0.102                    | <.001 | -0.037                  | -0.024      |
| Age (years)                                                                                               | 0.001                         | 0.000      | 0.055                     | <.001 | <0.001                  | 0.001       |
| Gender (female=1; male=2)                                                                                 | -0.001                        | 0.003      | -0.002                    | .860  | -0.007                  | 0.006       |
| Migration background (no= 1; yes=2)                                                                       | 0.012                         | 0.008      | 0.017                     | .133  | -0.004                  | 0.027       |
| Socioeconomic status (SES) (high=1; middle and low=2)                                                     | -0.007                        | 0.004      | -0.018                    | .116  | -0.016                  | 0.002       |
| Comorbidity (yes=1; no=2)                                                                                 | 0.002                         | 0.004      | 0.004                     | .708  | -0.007                  | 0.010       |
| Married/ living in a Relationship (no=1; yes=2)                                                           | -0.001                        | 0.004      | -0.003                    | .791  | -0.009                  | 0.007       |
| Having Children (yes=1; no=2)                                                                             | -0.010                        | 0.004      | -0.033                    | .023  | -0.018                  | -0.001      |
| Access to balcony or garden (yes=0; no=1)                                                                 | -0.002                        | 0.005      | -0.006                    | .640  | -0.012                  | 0.007       |
| I think the coronavirus is dangerous. *                                                                   | 0.011                         | 0.008      | 0.017                     | .175  | -0.005                  | 0.027       |
| When I isolate/quarantine myself, I am protecting myself. *                                               | 0.004                         | 0.004      | 0.013                     | .268  | -0.003                  | 0.011       |
| When I isolate/ quarantine myself, I am protecting other members of my household. *                       | 0.012                         | 0.004      | 0.038                     | .002  | 0.005                   | 0.020       |
| When I isolate/ quarantine myself, I am protecting our society from a further spread of the coronavirus.* | 0.044                         | 0.013      | 0.041                     | .001  | 0.019                   | 0.070       |
| I experienced difficulties in obtaining everyday necessities during isolation/quarantine *                | -0.015                        | 0.004      | -0.044                    | <.001 | -0.023                  | -0.007      |
| I suffered financial losses due to the isolation/quarantine (yes=1; no=2)                                 | -0.005                        | 0.004      | -0.012                    | .294  | -0.013                  | 0.004       |
| I think the isolation/ quarantine measures are too strict. *                                              | -0.016                        | 0.004      | -0.048                    | <.001 | -0.024                  | -0.008      |
| I think the isolation/ quarantine measures are too lax. *                                                 | -0.012                        | 0.004      | -0.037                    | .002  | -0.020                  | -0.005      |
| People in my professional and social environment have expected me to implement the quarantine measures. * | 0.037                         | 0.006      | 0.070                     | <.001 | 0.025                   | 0.049       |
| I have been given clear information about the reason for the isolation/quarantine. *                      | 0.007                         | 0.006      | 0.017                     | .244  | -0.005                  | 0.018       |
| It was explained to me in an understandable way how to behave in quarantine. *                            | 0.047                         | 0.006      | 0.125                     | <.001 | 0.036                   | 0.058       |
| <b>Household adherence score</b>                                                                          |                               |            |                           |       |                         |             |
| Infected persons (1) vs. Contact persons (2)                                                              | -0.052                        | 0.010      | -0.102                    | <.001 | -0.072                  | -0.032      |
| Age (years)                                                                                               | 0.002                         | 0.001      | 0.104                     | <.001 | 0.001                   | 0.003       |
| Sex (female=1; male=2)                                                                                    | 0.023                         | 0.010      | 0.046                     | .023  | 0.003                   | 0.043       |
| Migration background (no= 1; yes=2)                                                                       | 0.067                         | 0.022      | 0.060                     | .003  | 0.023                   | 0.110       |

|                                                                                                           |        |       |        |       |        |        |
|-----------------------------------------------------------------------------------------------------------|--------|-------|--------|-------|--------|--------|
| Socioeconomic status (SES) (high=1; middle and low=2)                                                     | -0.028 | 0.012 | -0.045 | .024  | -0.053 | -0.004 |
| Comorbidity (yes=1; no=2)                                                                                 | -0.006 | 0.012 | -0.010 | .608  | -0.030 | 0.018  |
| Married/ living in a Relationship (no=1; yes=2)                                                           | 0.064  | 0.014 | 0.101  | <.001 | 0.036  | 0.091  |
| Having Children (yes=1; no=2)                                                                             | -0.029 | 0.013 | -0.058 | .029  | -0.054 | -0.003 |
| Access to balcony or garden (yes=0; no=1)                                                                 | -0.015 | 0.017 | -0.017 | .391  | -0.048 | 0.019  |
| I think the coronavirus is dangerous. *                                                                   | 0.055  | 0.023 | 0.049  | .019  | 0.009  | 0.101  |
| When I isolate/quarantine myself, I am protecting myself. *                                               | 0.008  | 0.010 | 0.015  | .455  | -0.012 | 0.028  |
| When I isolate/ quarantine myself, I am protecting other members of my household. *                       | 0.142  | 0.013 | 0.236  | <.001 | 0.117  | 0.167  |
| When I isolate/ quarantine myself, I am protecting our society from a further spread of the coronavirus.* | 0.069  | 0.042 | 0.034  | .099  | -0.013 | 0.150  |
| I experienced difficulties in obtaining everyday necessities during isolation/quarantine *                | -0.004 | 0.012 | -0.006 | .766  | -0.028 | 0.021  |
| I suffered financial losses due to the isolation/quarantine (yes=1; no=2)                                 | -0.025 | 0.013 | -0.040 | .049  | -0.049 | <0.001 |
| I think the isolation/ quarantine measures are too strict. *                                              | -0.015 | 0.012 | -0.026 | .201  | -0.038 | 0.008  |
| I think the isolation/ quarantine measures are too lax. *                                                 | -0.012 | 0.011 | -0.022 | .276  | -0.035 | 0.010  |
| People in my professional and social environment have expected me to implement the quarantine measures. * | 0.007  | 0.019 | 0.007  | .729  | -0.031 | 0.045  |
| I have been given clear information about the reason for the isolation/quarantine. *                      | 0.040  | 0.017 | 0.057  | .019  | 0.007  | 0.074  |
| It was explained to me in an understandable way how to behave in quarantine. *                            | 0.032  | 0.016 | 0.048  | .047  | 0.000  | 0.064  |
